# Supplementary material for: Collaboration and knowledge generation in an 18-year quality improvement research programme in Australian Indigenous primary healthcare: a coauthorship network analysis
Source: PubMed Central journal article supplement — BMJ Open. 2021 May 6;11(5):e045101. doi: 10.1136/bmjopen-2020-045101 (PMC8103942; doi:10.1136/bmjopen-2020-045101), 2021-05-06
Supplement: bmjopen-2020-045101.draft_revisions.pdf [file bmjopen-2020-045101.draft_revisions.pdf]

# BMJ Open

BMJ Open is committed to open peer review. As part of this commitment we make the peer review history of every article we publish publicly available.

When an article is published we post the peer reviewers' comments and the authors' responses online. We also post the versions of the paper that were used during peer review. These are the versions that the peer review comments apply to.

The versions of the paper that follow are the versions that were submitted during the peer review process. They are not the versions of record or the final published versions. They should not be cited or distributed as the published version of this manuscript.

BMJ Open is an open access journal and the full, final, typeset and author-corrected version of record of the manuscript is available on our site with no access controls, subscription charges or pay-per-view fees (<http://bmjopen.bmj.com>).

If you have any questions on BMJ Open's open peer review process please email [info.bmjopen@bmj.com](mailto:info.bmjopen@bmj.com)

# BMJ Open

## Collaboration and knowledge generation in an 18- year quality improvement research program in Australian Indigenous primary health care: a co-authorship network analysis

|                               |                                                                                                                                                                                                                                                                                                                                                                                                                                                                                                                                                                                                                                                                                                                                                                                                                                                                                                                                                                                                                                                                                                                                                   |
|-------------------------------|---------------------------------------------------------------------------------------------------------------------------------------------------------------------------------------------------------------------------------------------------------------------------------------------------------------------------------------------------------------------------------------------------------------------------------------------------------------------------------------------------------------------------------------------------------------------------------------------------------------------------------------------------------------------------------------------------------------------------------------------------------------------------------------------------------------------------------------------------------------------------------------------------------------------------------------------------------------------------------------------------------------------------------------------------------------------------------------------------------------------------------------------------|
| Journal:                      | <i>BMJ Open</i>                                                                                                                                                                                                                                                                                                                                                                                                                                                                                                                                                                                                                                                                                                                                                                                                                                                                                                                                                                                                                                                                                                                                   |
| Manuscript ID                 | bmjopen-2020-045101                                                                                                                                                                                                                                                                                                                                                                                                                                                                                                                                                                                                                                                                                                                                                                                                                                                                                                                                                                                                                                                                                                                               |
| Article Type:                 | Original research                                                                                                                                                                                                                                                                                                                                                                                                                                                                                                                                                                                                                                                                                                                                                                                                                                                                                                                                                                                                                                                                                                                                 |
| Date Submitted by the Author: | 24-Sep-2020                                                                                                                                                                                                                                                                                                                                                                                                                                                                                                                                                                                                                                                                                                                                                                                                                                                                                                                                                                                                                                                                                                                                       |
| Complete List of Authors:     | Bailie, Jodie; The University of Sydney, University Centre for Rural Health; The University of Sydney, School of Public Health<br>Potts, Boyd; The University of Sydney, University Centre for Rural Health<br>Laycock, Alison; The University of Sydney, University Centre for Rural Health<br>Abimbola, Seye; The University of Sydney, School of Public Health; University of New South Wales, The George Institute for Global Health<br>Bailie, Ross; University of Sydney, University Centre for Rural Health<br>Cunningham, Frances; Charles Darwin University, Menzies School of Health Research<br>Matthews, Veronica; The University of Sydney, University Centre for Rural Health<br>Bainbridge, Roxanne; Central Queensland University, Centre for Indigenous Health Equity<br>Conte, Kathleen; The University of Sydney, University Centre for Rural Health; DePaul University, School of Public Health<br>Passey, Megan; The University of Sydney, University Centre for Rural Health<br>Peiris, David; University of New South Wales, The George Institute for Global Health; The University of Sydney, The School of Public Health |
| Keywords:                     | Health policy < HEALTH SERVICES ADMINISTRATION & MANAGEMENT, PRIMARY CARE, HEALTH SERVICES ADMINISTRATION & MANAGEMENT                                                                                                                                                                                                                                                                                                                                                                                                                                                                                                                                                                                                                                                                                                                                                                                                                                                                                                                                                                                                                            |
|                               |                                                                                                                                                                                                                                                                                                                                                                                                                                                                                                                                                                                                                                                                                                                                                                                                                                                                                                                                                                                                                                                                                                                                                   |

SCHOLARONE™  
Manuscripts

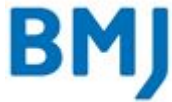

I, the Submitting Author has the right to grant and does grant on behalf of all authors of the Work (as defined in the below author licence), an exclusive licence and/or a non-exclusive licence for contributions from authors who are: i) UK Crown employees; ii) where BMJ has agreed a CC-BY licence shall apply, and/or iii) in accordance with the terms applicable for US Federal Government officers or employees acting as part of their official duties; on a worldwide, perpetual, irrevocable, royalty-free basis to BMJ Publishing Group Ltd ("BMJ") its licensees and where the relevant Journal is co-owned by BMJ to the co-owners of the Journal, to publish the Work in this journal and any other BMJ products and to exploit all rights, as set out in our [licence](#).

The Submitting Author accepts and understands that any supply made under these terms is made by BMJ to the Submitting Author unless you are acting as an employee on behalf of your employer or a postgraduate student of an affiliated institution which is paying any applicable article publishing charge ("APC") for Open Access articles. Where the Submitting Author wishes to make the Work available on an Open Access basis (and intends to pay the relevant APC), the terms of reuse of such Open Access shall be governed by a Creative Commons licence – details of these licences and which [Creative Commons](#) licence will apply to this Work are set out in our licence referred to above.

Other than as permitted in any relevant BMJ Author's Self Archiving Policies, I confirm this Work has not been accepted for publication elsewhere, is not being considered for publication elsewhere and does not duplicate material already published. I confirm all authors consent to publication of this Work and authorise the granting of this licence.

# TITLE PAGE

## Title

Collaboration and knowledge generation in an 18- year quality improvement research program in Australian Indigenous primary health care: a co-authorship network analysis

## Authors

Jodie Bailie<sup>1,2,\*</sup>

Boyd Alexander Potts<sup>1</sup>

Alison Frances Laycock<sup>1</sup>

Seye Abimbola<sup>2,3</sup>

Ross Stewart Bailie<sup>1</sup>

Frances Clare Cunningham<sup>4</sup>

Veronica Matthews<sup>1</sup>

Roxanne Gwendalyn Bainbridge<sup>5</sup>

Kathleen Parker Conte<sup>1</sup>

Megan Elizabeth Passey<sup>1</sup>

David Peiris<sup>2,3</sup>

## Affiliations

<sup>1</sup>University Centre for Rural Health, The University of Sydney, Lismore, NSW, Australia

<sup>2</sup>School of Public Health, The University of Sydney, Sydney, NSW, Australia

<sup>3</sup>The George Institute for Global Health, The University of New South Wales, Sydney, NSW, Australia

<sup>4</sup>Menzies School of Health Research, Charles Darwin University, Brisbane, QLD, Australia

<sup>5</sup>Centre for Indigenous Health Equity, Central Queensland University, Cairns, QLD, Australia

## \* Corresponding author

61 Uralba Street, Lismore, NSW 2480, Australia

Email: [jodie.bailie@sydney.edu.au](mailto:jodie.bailie@sydney.edu.au)

## Key words

Quality improvement; collaboration; research networks; social network analysis; co-authorship network analysis; evaluation; innovation platforms; partnership research

# 1 ABSTRACT

## 2 Objectives

3 Though multidisciplinary research networks support the practice and effectiveness of continuous  
4 quality improvement (CQI) programs, their characteristics and development are poorly understood. In  
5 this study we examine publication outputs from a research network in Australian Indigenous primary  
6 health care (PHC) to assess to what extent the research network changed over time.

## 7 Setting

8 Australian CQI research network in Indigenous PHC from 2002 - 2019.

## 9 Participants

10 Authors from peer-reviewed journal articles and books published by the network.

## 11 Design

12 Co-author networks across four phases of the network (2002–04; 2005–09; 2010–14; 2015–19) were  
13 constructed based on author affiliations and examined using social network analysis methods.  
14 Descriptive characteristics included organisation types, Indigenous representation, gender, student  
15 authorship and thematic research trends.

## 16 Results

17 We identified 128 publications written by 308 individual authors from 79 different organisations.  
18 Publications increased in number and diversity over each funding phase. During the final phase,  
19 publication outputs accelerated for organisations, students, project officers, Indigenous and female  
20 authors. Over time there was also a shift in research themes to encompass new clinical areas and social,  
21 environmental or behavioural determinants of health. Average degree (8.1), clustering (0.81) and  
22 diameter (3) indicated a well-connected network, with a core-periphery structure in each phase ( $p \leq 0.03$ )  
23 rather than a single central organisation (degree-centralisation=0.55-0.65). Academic organisations  
24 dominated the core structure in all funding phases.

## 25 Conclusion

26 Collaboration in publications increased with network consolidation and expansion. Increased  
27 productivity was associated with increased authorship diversity and a decentralised network, suggesting

1  
2  
3 1 these may be important factors in enhancing research impact and advancing the knowledge and practice  
4 2 of CQI in primary health care. Publication diversity and growth occurred mainly in the fourth phase,  
5 3 suggesting long-term relationship building among diverse partners is required to facilitate participatory  
6 4 research in CQI. Despite improvements, further work is needed to address inequities in female  
7 5 authorship and Indigenous authorship.  
8  
9  
10  
11  
12  
13  
14  
15  
16  
17  
18  
19  
20  
21  
22  
23  
24  
25  
26  
27  
28  
29  
30  
31  
32  
33  
34  
35  
36  
37  
38  
39  
40  
41  
42  
43  
44  
45  
46  
47  
48  
49  
50  
51  
52  
53  
54  
55  
56  
57  
58  
59  
60

For peer review only

## STRENGTHS AND LIMITATIONS OF THIS STUDY

- A study strength was the long timeframe of 18 years of publications from an Australian quality improvement research network.
- Although co-authorship is only one indicator of collaboration, there are several advantages to relying on it as a proxy for assessing the level of research collaboration, including its verifiability, stability over time, availability of data in the public domain and ease of measurement.
- Methods such as co-authorship analysis are useful for demonstrating a pathway to research impact related to engagement, which traditionally tends to rely on the quantity of outputs rather than on the strengthening of networks and the scope of work undertaken.
- Co-authorship is only one indicator of collaboration, though it has several advantages to relying on it as a proxy for assessing research collaboration including its verifiability, stability over time, and availability in the public domain.
- Our analysis does not include the multiple affiliations of many of the authors and so may under-report the level of collaboration. Many other collaborative efforts are not reflected in co-authorship metrics, such as collaborations that continue to occur through co-authorship, grant submissions, and conference presentations.

## 1 INTRODUCTION

2 Over the past two decades, continuous quality improvement (CQI) programs have been widely taken  
3 up by primary healthcare (PHC) services caring for Aboriginal and Torres Strait Islander people  
4 (hereafter respectfully referred to as Indigenous people, acknowledging their cultural and historical  
5 diversity) across Australia.(1, 2) CQI – a set of methods for improving the quality of care, through  
6 continuous measurement and problem-solving techniques(3, 4) – has been found to improve the quality  
7 of care delivered in Indigenous PHC.(1, 5)

8 While evidence indicates no single model of CQI outperforms others, the most successful applications  
9 of CQI are multi-site and multi-faceted approaches that aim to achieve change at various levels of the  
10 health system.(6) We and others have argued the need for multidisciplinary research networks to  
11 support the practice and effectiveness of CQI (6, 7) and to foster co-production and sharing of  
12 knowledge. However, despite research networks often being touted as a solution for enhancing  
13 knowledge translation into policy and practice, their characteristics and emergence over time are poorly  
14 understood.(8-10) Furthermore, evaluation challenges can be considerable because research networks  
15 are often loosely defined and manifest in different forms with formal and informal organisational  
16 structures.(11, 12)

17 We sought to better understand the development and growth of a multidisciplinary research network in  
18 Indigenous PHC quality improvement, and how these aspects reflected the vision of the network with  
19 respect to capacity strengthening, equity and membership diversity. Co-authorship network analysis  
20 offers one feasible strategy for evaluating the growth and emergence of research networks, because  
21 publications are well documented and reflect collaboration.(13-15) The study uses co-authorship  
22 network analysis to examine the growth and change in an 18-year CQI research network in Australian  
23 Indigenous primary health care. We address the question: How did the research network expand and  
24 change over time? Specifically we will investigate the extent to which the research network brought  
25 together people from a variety of organisations; the structural characteristics of the network; the level  
26 of equity in authorship relative to Indigenous status and gender; capacity strengthening efforts through  
27 examining student authorship; and changes in research themes over time.

### 28 The setting

29 Although Australia has a high-performing health system, underpinned by a universal health insurance  
30 scheme, it ranks low on measures of equity when compared with other Organisation for Economic Co-  
31 operation and Development (OECD) nations.(16) This ranking is reflected in consistent  
32 underperformance in addressing inequities in health care access, quality of care and outcomes for  
33 Indigenous people.(17-19) These inequities are underpinned by a legacy of colonisation, land



1  
2  
3 1 dispossession, displacement, disempowerment, social and economic exclusion, and ongoing racial  
4 2 discrimination.(19, 20)  
5  
6

7 3 To help address these inequities, the Audit and Best Practice in Chronic Disease (ABCD) participatory  
8 4 action research program was initiated in 2002. Drawing on international evidence about the  
9 5 effectiveness of system-wide CQI approaches to improve the quality of PHC service delivery,(21) the  
10 6 ABCD program employed a systems approach to support the CQI efforts of PHC services established  
11 7 to provide care for Indigenous Australians.(1, 6, 22) Connected to this research program, in 2010 a  
12 8 national, not-for-profit, CQI support entity – One21seventy – was established to support Indigenous  
13 9 PHC services in implementing CQI cycles using standardised, evidence-based, best practice clinical  
14 10 audit and systems assessment tools. Notably, 175 of the over 275 PHC centres involved provided the  
15 11 research network with de-identified data derived from their use of the CQI tools and processes. The  
16 12 studies published by network members reporting analyses of these data form a comprehensive picture  
17 13 of the quality of PHC received by Indigenous people around Australia. (1) Between 2010 and 2016,  
18 14 ABCD research accounted for 42 of the 60 (70%) peer-reviewed publications identified in a systematic  
19 15 review on CQI in Indigenous PHC in Australia,(2) and also made a significant contribution to  
20 16 international CQI research.(23) Importantly, although there were demonstrated improvements in quality  
21 17 of care in some areas of clinical care, there was continuing wide variation between PHC centres and  
22 18 jurisdictions.(1,5)  
23  
24  
25  
26  
27  
28  
29  
30  
31  
32

33 19 Table 1 sets out the four distinct phases of the ABCD program's evolution from 2002 to December  
34 20 2019, its research aims, systems-strengthening dimensions and main findings. The intention of the  
35 21 resulting network was an 'open collaboration' that actively encourages cooperation with other  
36 22 organisations and individuals to help achieve the program's aims. The current phase of research (2020-  
37 23 24) is included in Table 1 but was not part of this study.  
38  
39  
40  
41  
42  
43  
44  
45  
46  
47  
48  
49  
50  
51  
52  
53  
54  
55  
56  
57  
58  
59  
60

Table 1: Phases and research focus of the ABCD program, an action research project implementing quality improvement in Indigenous PHC, 2002–2019

|                      | <b>Phase 1</b><br>Exploring feasibility and acceptability of CQI tools and processes | <b>Phase 2</b><br>Exploring scalability and expansion of CQI                        | <b>Phase 3</b><br>Supporting wide-scale implementation of CQI and development of Partnership Learning Model | <b>Phase 4</b><br>Embedding CQI approaches in systems                                                                                                                | Current Phase (not part of study)<br>Strengthening leadership and engagement in system wide CQI                                                                                            |                                                                                                                                                                                                                                                                                  |
|----------------------|--------------------------------------------------------------------------------------|-------------------------------------------------------------------------------------|-------------------------------------------------------------------------------------------------------------|----------------------------------------------------------------------------------------------------------------------------------------------------------------------|--------------------------------------------------------------------------------------------------------------------------------------------------------------------------------------------|----------------------------------------------------------------------------------------------------------------------------------------------------------------------------------------------------------------------------------------------------------------------------------|
|                      | <b>ABCD (2002–2004)</b>                                                              | <b>ABCD Extension (2005–2009)</b>                                                   | <b>ABCD National Research Partnership (2010–2014)</b>                                                       | <b>One21seventy (2010–2016) service support arm</b>                                                                                                                  | <b>Centre for Research Excellence in Integrated Quality Improvement (CRE-IQI) (2015–2019)</b>                                                                                              | Centre for Research Excellence in Strengthening Systems for Indigenous Health Care Equity (CRE-STRIDE) 2020–2024 <sup>#</sup>                                                                                                                                                    |
| <b>Research aims</b> | Explore whether a CQI approach was feasible and effective in Indigenous PHC.(24)     | Identify support requirements for large-scale implementation of the ABCD model.(25) | Understand variation in quality of care and strategies for improvement.(22)                                 | Primarily a service support function. Voluntary contribution of data by services for research purposes, and potential for other involvement of services in research. | <ul style="list-style-type: none"> <li>— Accelerate and strengthen large-scale CQI efforts.</li> <li>— Explore the feasibility/functioning of an ‘innovation platform.’(26, 27)</li> </ul> | <ul style="list-style-type: none"> <li>— Strengthen Aboriginal and Torres Strait Islander research leadership for CQI.</li> <li>— Extend CQI methods to sectors beyond the PHC clinical environment.(28)</li> <li>— Enhance community participation in CQI processes.</li> </ul> |

1  
2  
3  
4  
5  
6  
7  
8  
9  
10  
11  
12  
13  
14  
15  
16  
17  
18  
19  
20  
21  
22  
23  
24  
25  
26  
27  
28  
29  
30  
31  
32  
33  
34  
35  
36  
37  
38  
39  
40  
41  
42  
43  
44  
45  
46

|                                                     |                                                                                                                                                                                                                                                                                                                                                                                                                                                                                                   |                                                                                                                                                                                                                                                                                                                                                                                                                                                                            |                                                                                                                                                                                                                                                                                                                                                                                                                                  |                                                                                                                                                                                                                                                                                                                                      |                                                                                                                                                                                                                                                                                                                                                                     |                                                                                                                                                                                                                                                                                                                     |
|-----------------------------------------------------|---------------------------------------------------------------------------------------------------------------------------------------------------------------------------------------------------------------------------------------------------------------------------------------------------------------------------------------------------------------------------------------------------------------------------------------------------------------------------------------------------|----------------------------------------------------------------------------------------------------------------------------------------------------------------------------------------------------------------------------------------------------------------------------------------------------------------------------------------------------------------------------------------------------------------------------------------------------------------------------|----------------------------------------------------------------------------------------------------------------------------------------------------------------------------------------------------------------------------------------------------------------------------------------------------------------------------------------------------------------------------------------------------------------------------------|--------------------------------------------------------------------------------------------------------------------------------------------------------------------------------------------------------------------------------------------------------------------------------------------------------------------------------------|---------------------------------------------------------------------------------------------------------------------------------------------------------------------------------------------------------------------------------------------------------------------------------------------------------------------------------------------------------------------|---------------------------------------------------------------------------------------------------------------------------------------------------------------------------------------------------------------------------------------------------------------------------------------------------------------------|
| <p><b>Health system strengthening dimension</b></p> | <ul style="list-style-type: none"> <li>Using participatory action research, a CQI process was introduced to 12 Indigenous PHC centres in one jurisdiction (Northern Territory) with a focus on the prevention and management of chronic disease.(29)</li> <li>CQI approach embraced to improve (and demonstrate) quality of care.</li> <li>Systems assessment tool provided a mechanism for ongoing local system improvement and integration with other organisations and sectors.(30)</li> </ul> | <ul style="list-style-type: none"> <li>Geographic scope of the project was extended to include 69 Indigenous PHC services in several jurisdictions across Australia.</li> <li>Scope was broadened to address other priority areas of PHC, with audit tools for additional areas of care.</li> <li>Informed health system planning and policy by showing how the ABCD approach could be scaled up, and examined barriers/enablers to engagement and improvement.</li> </ul> | <ul style="list-style-type: none"> <li>More than 175 Indigenous PHC services across Australia involved in ABCD program.(31)</li> <li>Brought together stakeholders from across jurisdictions and levels of the health system to support and guide research on priority PHC health system issues, and to contribute to refining CQI tools and processes, interpreting data, applying findings and sharing lessons.(31)</li> </ul> | <p>Provided CQI training and tools with systems thinking focus, and web-based data analysis and reporting system able to provide local and aggregated data reports, with benchmarking. 275 + health services used ABCD tools and processes, and more than 2500 PHC staff were trained in the use of CQI tools and processes.(31)</p> | <ul style="list-style-type: none"> <li>Adapted and extended the Partnership Learning Model, developed through previous phases of the research, by engaging with a wider range of stakeholders responsible for Indigenous PHC to solve problems and innovate together.</li> <li>Emphasis on research capacity strengthening and research translation.(32)</li> </ul> | <ul style="list-style-type: none"> <li>Develop new knowledge to strengthen integration in comprehensive PHC and embed CQI at all levels of the PHC system.</li> <li>Strengthen Indigenous community input into improving CQI processes.</li> <li>Extend CQI processes and collaborations across sectors.</li> </ul> |
|-----------------------------------------------------|---------------------------------------------------------------------------------------------------------------------------------------------------------------------------------------------------------------------------------------------------------------------------------------------------------------------------------------------------------------------------------------------------------------------------------------------------------------------------------------------------|----------------------------------------------------------------------------------------------------------------------------------------------------------------------------------------------------------------------------------------------------------------------------------------------------------------------------------------------------------------------------------------------------------------------------------------------------------------------------|----------------------------------------------------------------------------------------------------------------------------------------------------------------------------------------------------------------------------------------------------------------------------------------------------------------------------------------------------------------------------------------------------------------------------------|--------------------------------------------------------------------------------------------------------------------------------------------------------------------------------------------------------------------------------------------------------------------------------------------------------------------------------------|---------------------------------------------------------------------------------------------------------------------------------------------------------------------------------------------------------------------------------------------------------------------------------------------------------------------------------------------------------------------|---------------------------------------------------------------------------------------------------------------------------------------------------------------------------------------------------------------------------------------------------------------------------------------------------------------------|

|                          |                                                                                                                                                                        |                                                                                                                                                                                                                                                |                                                                                                                                                                                                                                                                                                                                     |                                                                                                                                                                                                   |                                                                                                                                                                                                                                                                                                                                                                                                                                                                                           |                |
|--------------------------|------------------------------------------------------------------------------------------------------------------------------------------------------------------------|------------------------------------------------------------------------------------------------------------------------------------------------------------------------------------------------------------------------------------------------|-------------------------------------------------------------------------------------------------------------------------------------------------------------------------------------------------------------------------------------------------------------------------------------------------------------------------------------|---------------------------------------------------------------------------------------------------------------------------------------------------------------------------------------------------|-------------------------------------------------------------------------------------------------------------------------------------------------------------------------------------------------------------------------------------------------------------------------------------------------------------------------------------------------------------------------------------------------------------------------------------------------------------------------------------------|----------------|
| <b>Research findings</b> | CQI approach was well accepted, demonstrated the feasibility and application of tools and processes, and showed improvements in care and intermediate health outcomes. | <ul style="list-style-type: none"> <li>— Identified key barriers and enablers to scaling up in an Indigenous context.(33)</li> <li>— Established the need for further tools to support the implementation of CQI in Indigenous PHC.</li> </ul> | <ul style="list-style-type: none"> <li>— Demonstrated improvements in quality of care in some areas, and continuing wide variation between PHC centres and jurisdictions.(1,5)</li> <li>— Developed Partnership Learning Model to achieve large-scale improvements in quality of care and population health outcomes.(6)</li> </ul> | <ul style="list-style-type: none"> <li>— + 70% of PHC centres engaged in One21seventy provided their de-identified data to the ABCD National Research Partnership for use in research.</li> </ul> | <ul style="list-style-type: none"> <li>— Established that clinical and other areas such as community health promotion and prevention outcomes can be improved by using evidence-based CQI tools and processes.(34)</li> <li>— Identified factors that support the effective use of CQI by PHC teams and services, and improvements in delivery of care.(35)</li> <li>— Identified priorities for strengthening PHC systems to achieve large-scale health improvements.(36, 37)</li> </ul> | Not applicable |
|--------------------------|------------------------------------------------------------------------------------------------------------------------------------------------------------------------|------------------------------------------------------------------------------------------------------------------------------------------------------------------------------------------------------------------------------------------------|-------------------------------------------------------------------------------------------------------------------------------------------------------------------------------------------------------------------------------------------------------------------------------------------------------------------------------------|---------------------------------------------------------------------------------------------------------------------------------------------------------------------------------------------------|-------------------------------------------------------------------------------------------------------------------------------------------------------------------------------------------------------------------------------------------------------------------------------------------------------------------------------------------------------------------------------------------------------------------------------------------------------------------------------------------|----------------|

1  
2  
3  
4  
5  
6  
7  
8  
9  
10  
11  
12  
13  
14  
15  
16  
17  
18  
19  
20  
21  
22  
23  
24  
25  
26  
27  
28  
29  
30  
31  
32  
33  
34  
35  
36  
37  
38  
39  
40  
41  
42  
43  
44  
45  
46

1  
2  
3  
4  
5  
6  
7  
8  
9  
10  
11  
12  
13  
14  
15  
16  
17  
18  
19  
20  
21  
22  
23  
24  
25  
26  
27  
28  
29  
30  
31  
32  
33  
34  
35  
36  
37  
38  
39  
40  
41  
42  
43  
44  
45  
46

|                                    |                                                                                                       |                                                                                                                                  |                                    |                                                   |                                                            |                                                            |
|------------------------------------|-------------------------------------------------------------------------------------------------------|----------------------------------------------------------------------------------------------------------------------------------|------------------------------------|---------------------------------------------------|------------------------------------------------------------|------------------------------------------------------------|
| <b>Funding source</b> <sup>+</sup> | NHMRC Fellowship.<br>Grant Number: #283303<br>Cooperative Research<br>Centre for Aboriginal<br>Health | Cooperative Research<br>Centre for Aboriginal<br>Health and the Australian<br>Commission on Safety and<br>Quality in Health Care | NHMRC Partnership<br>Scheme #54267 | Not-for-profit / cost-<br>recovery service agency | NHMRC Centres of<br>Research Excellence<br>Scheme #1078927 | NHMRC Centres of<br>Research Excellence Scheme<br>#1170882 |
|------------------------------------|-------------------------------------------------------------------------------------------------------|----------------------------------------------------------------------------------------------------------------------------------|------------------------------------|---------------------------------------------------|------------------------------------------------------------|------------------------------------------------------------|

**NB:** ABCD – audit and best practice for chronic disease; CQI – continuous quality improvement; PHC – primary health care; NHMRC – National Health and Medical Research Council

**Source:** Adapted from Bailie et al. 2013

+ Although the projects were supported by research funding, it is important to note there were financial contributions and in-kind support from a range of community-controlled and government agencies.

# CRE-STRIDE is the current form of the network, and its successful funding underscores the research program’s longevity and stability.

For peer review only

## METHODS

We used social network analysis, as described by Fonseca and co-authors(13) in their health sector co-authorship network analysis, to retrieve scientific publications, standardise entries for authors and organisations, visualise the network and calculate metrics.

### Data retrieval

Details of peer-reviewed journal articles and books (the ‘publications’) were retrieved from administrative records held by the Centre for Research Excellence in Integrated Quality Improvement (CRE-IQI) coordinating centre, and included all publications published from 2002–2019.

### Data categorisation, standardisation, and cleaning

Publications were sorted into categories and research themes that were iteratively developed and defined by JB and RSB. We describe the process for categorisation of included publications below.

**Organisations:** the affiliations of the authors (as per their citation on publications) were coded into Universities and Research Institutes; Government Departments; Health Services; Affiliates; Primary Health Networks; and Non-Government Organisations. Where authors had more than one affiliation listed on the publication, we used the first affiliation provided. Other key points in the categorisation of publications were as follows:

- We used the author’s University rather than their specific Department and, if named, the Research Institute rather than the University.
- Where an author’s affiliation was nominated as a hospital we used the State Health Department with which these organisations were affiliated.
- ‘Affiliates’ refers to regional support organisations established to support Indigenous health services, such as Aboriginal Medical Services Alliance Northern Territory.
- ‘Health Service’ refers to services established primarily to provide PHC to Indigenous people, and includes Aboriginal community-controlled services, Government services, and private General Practice.
- Primary Health Networks refer to independent regional PHC organisations across Australia that commission rather than provide services, as established by the Australian Government in July 2015.
- Non-Government Organisations refer to not-for-profit organisations that operate independently of Government, typically with the purpose of addressing a social or political issue.

**Research themes:** Publications were assigned to one of the following three research themes:

1. *CQI-related program activities that address clinical care delivery in the PHC setting:* publications that focus on the quality, and variations in delivery, of clinical care, and the application of, or learning from, CQI techniques in relation to a specific aspect of clinical care, e.g., child health and chronic illness care.
2. *CQI-related program activities that address social, environmental or behavioural determinants – i.e. community health promotion or prevention activities:* publications that focus on the application of, or learning from, CQI with a focus on areas such as health promotion, social and environmental conditions, housing, food security, and family wellbeing in general community settings.
3. *CQI-related processes and approaches:* publications related to CQI program development (such as study protocols and reviews informing CQI approaches), health systems strengthening, and the development and evaluation of research collaborations and their impact.

In categorising the publications by research themes, abstracts of publications were retrieved and screened by blinded reviewers (JB and RSB). Inconsistencies in reviewer assessments were resolved by consensus.

**Role type:** We identified all authors who were students or project officers at the time of the publication, and who had authored in this capacity. The student category included Public Health Trainees, and Masters, PhD, and Medical Honours students. Project officers were identified as those whose primary role supported research, and/or related either to health care administration and/or to project work.

**Indigenous status:** Coordinating centre records flagged authors who identified as Indigenous.

**Gender:** Authors were assigned a male or female category through a number of ways – reviewer knowledge of authors and Google searches.

Where there was uncertainty in allocating the above categories, JB checked with RSB and, when necessary, with the corresponding authors of the manuscripts. Data were entered into an Excel spreadsheet, and then standardised and cleaned by JB and BAP.

## Network assembly, visualisation and analysis

The evolution of the research network was analysed over the four phases displayed in Table 1, with the analysis split into three parts: 1) an analysis of publications by type of organisation represented, research themes, the role of authors, and the Indigenous status of authors; 2) the network analysis of co-authorship between organisations; and 3) a core-periphery analysis of organisational position within the network.

Python programming language version 3.7.4(38) and the *Jupyter Notebook*(39) application accessed through the *Anaconda Navigator*(40) interface were used to script all data manipulation and analytical

1 work. Network analyses used the Python package *NetworkX*,<sup>(41)</sup> with visualisations produced with the  
2 open-source *Gephi* program.<sup>(42)</sup>

3 We first created a node list containing every organisation and its attributes (unique identifier,  
4 organisation name, type and years published), and an edge list representing co-authorship as pairwise  
5 combinations of each organisation listed on a publication and its unique attributes.

6 A single, undirected edge of weight=1 was assigned for each organisation pair that shared at least one  
7 publication in each phase of the network. For publications that involved only authors from the same  
8 organisation, a self-loop edge of weight=0 was assigned. No additional weight was given to the number  
9 of publications or authors involved or any other attribute. This approach was chosen so that results of  
10 the analysis could be directly interpreted in the context of inter-organisational collaboration.

11 Networks were analysed discretely across the four phases. Several network measures (defined in Table  
12 2) were used to understand the resulting networks.

13 *Table 2: Theoretical definitions of social network analysis measures, and their meaning in this study*

| Measure                 | Definition, meaning in this study, and importance                                                                                                                                                                                                                                                                                                                                                                                                                                                                                       |
|-------------------------|-----------------------------------------------------------------------------------------------------------------------------------------------------------------------------------------------------------------------------------------------------------------------------------------------------------------------------------------------------------------------------------------------------------------------------------------------------------------------------------------------------------------------------------------|
| Node                    | The basic unit of a network. Nodes represent organisations. The node size is proportional to the number of publications.                                                                                                                                                                                                                                                                                                                                                                                                                |
| Edge or Tie             | An edge or tie connects two nodes in a network, and indicates a relationship between the two. An edge between two organisations indicates co-authorship of at least one publication.                                                                                                                                                                                                                                                                                                                                                    |
| Density                 | The density of a network is the total number of edges divided by the total number of possible edges. It is a widely used measure that reflects the level of cohesion among network organisations, or the extent to which organisations collaborated with every other organisation in the network.                                                                                                                                                                                                                                       |
| Average degree          | Degree is a count of the number of connections for any given node: the higher the average degree, the more connected the network. The average number of inter-organisational collaborations per organisation.                                                                                                                                                                                                                                                                                                                           |
| Clustering co-efficient | Clustering is a measure of how many of the nodes connected to a given node are also connected to each other, which is expressed as a proportion of the total possible connections. The overall clustering co-efficient is the average across the network. Where density tells you how connected the network is, the clustering co-efficient tells you how well connected the various neighbourhoods of the network are. A high clustering co-efficient and low density can be an indication of lots of small groups, loosely connected. |



|                               |                                                                                                                                                                                                                                                                               |
|-------------------------------|-------------------------------------------------------------------------------------------------------------------------------------------------------------------------------------------------------------------------------------------------------------------------------|
| Path/path length              | The path is any connected series of edges between two nodes. The length of a path is the number of steps (edges) and shows how quickly organisations can communicate with each other through their links.                                                                     |
| Geodesic distance             | The geodesic distance is the shortest path of all possible options between two nodes in the network. The number of steps it takes to get across a network is a useful measure of how quickly information can be disseminated to the entire network.                           |
| Diameter                      | The diameter of the network is the ‘longest short path’ between nodes and indicates the maximum number of steps it would take to get between nodes that are furthest away from each other in the network. The diameter gives a useful indication of how broad the network is. |
| Centralisation                | This reflects how tightly the organisations are connected around the most central point of the network and how reliant the network may be on a central node.                                                                                                                  |
| Discrete core-periphery model | A network with a core-periphery structure has a ‘core’ of nodes densely connected to each other and to others, and ‘periphery’ nodes in the less-connected ‘periphery’ that are connected only to core nodes.                                                                 |

The analysis of network position at the organisational level uses discrete core-periphery analysis(43) to identify organisations that are well connected to each other (the core) as distinct from those less well connected (the periphery). To detect the core-periphery, we used the Borgatti and Everett(43) algorithm and the non-parametric statistical test devised by Kojaku and Masuda(44).

## Patient and public involvement

No patients or members of the public were involved in the design, analysis or reporting of this study.

## RESULTS

We identified 128 publications written by 308 authors, with a median of six authors per publication (Interquartile Range = 4–9.25), representing 79 different organisations (Table 3). Most authors (182 or 59.5%) contributed just one publication, while 18 (5.9%) contributed 10 or more. The chief investigator (RSB) of the original ABCD program co-authored 97 of the 128 publications (Supplementary File 1).

*Table 3: Co-authorship characteristics, by phases and total 2002–2019*

| Indicator | Phase 1:<br>2002–<br>2004 | Phase 2:<br>2005–2009 | Phase 3:<br>2010–<br>2014 | Phase 4:<br>2015–2019 | Total:<br>2002–2019 |
|-----------|---------------------------|-----------------------|---------------------------|-----------------------|---------------------|
|-----------|---------------------------|-----------------------|---------------------------|-----------------------|---------------------|

|                                                                                              |                                  |            |                |             |            |               |
|----------------------------------------------------------------------------------------------|----------------------------------|------------|----------------|-------------|------------|---------------|
| Number of publications                                                                       |                                  | 2          | 15             | 21          | 90         | 128           |
| Number of different authors                                                                  |                                  | 5          | 33             | 67          | 263        | 308           |
| Number of authors per paper (median, IQR)                                                    |                                  | 5, [5 - 5] | 5, [3.5 - 8.5] | 9, [4 - 13] | 6, [5 - 9] | 6, [4 - 9.25] |
| <b>Organisational involvement</b>                                                            |                                  |            |                |             |            |               |
| Number of nodes (organisations)                                                              |                                  | 3          | 12             | 24          | 72         | 79            |
| Number and type of different organisations                                                   | University or Research Institute | 3          | 8              | 15          | 45         | 48            |
|                                                                                              | Government Department            | –          | 2              | 3           | 9          | 10            |
|                                                                                              | Affiliate                        | –          | 1              | 4           | 2          | 5             |
|                                                                                              | Health Service                   | –          | 1              | 2           | 11         | 11            |
|                                                                                              | Non-Government Organisation      | –          | –              | –           | 4          | 4             |
| Primary Health Network                                                                       | –                                | –          | –              | 1           | 1          |               |
| Number of publications with an author who has an international affiliation                   |                                  | 0          | 1              | 0           | 8          | 9             |
| <b>Capacity strengthening</b>                                                                |                                  |            |                |             |            |               |
| Number and percentage of publications with a student/project officer as a lead author        |                                  | 0 (0%)     | 2 (13%)        | 3 (14%)     | 25 (28%)   | 30 (23%)      |
| Number and percentage of publications with at least one student/project officer as an author |                                  | 2 (100%)   | 12 (80%)       | 13 (62%)    | 52 (58%)   | 79 (62%)      |
| <b>Addressing equity</b>                                                                     |                                  |            |                |             |            |               |
| Number and percentage of female authors                                                      |                                  | 1 (25%)    | 20 (60%)       | 39 (58%)    | 171 (65%)  | 192 (62%)     |
| Number and percentage of publications with a female first author                             |                                  | 0 (0%)     | 2 (13%)        | 14 (67%)    | 76 (84%)   | 92 (72%)      |
| Number and percentage of publications with a female last author                              |                                  | 0 (0%)     | 4 (27%)        | 6 (29%)     | 25 (28%)   | 35 (27%)      |
| Number and percentage of publications with at least one Indigenous author                    |                                  | 0 (0%)     | 6 (40%)        | 13 (62%)    | 56 (62%)   | 75 (59%)      |
| Number and percentage of publications with an Indigenous lead author                         |                                  | 0 (0%)     | 0 (0%)         | 2 (10%)     | 3 (3%)     | 5 (4%)        |
| Number and percentage of publications with an Indigenous last author                         |                                  | 0 (0%)     | 3 (20%)        | 0 (0%)      | 0 (0%)     | 0 (0%)        |
| <b>Thematic trends in publications</b>                                                       |                                  |            |                |             |            |               |

|                                                                |                                                                                 |          |               |               |                |                  |
|----------------------------------------------------------------|---------------------------------------------------------------------------------|----------|---------------|---------------|----------------|------------------|
| Thematic areas, number and percentage                          | CQI-related activities in clinical care                                         | 2 (100%) | 6 (40%)       | 8 (38%)       | 44 (49%)       | 60 (47%)         |
|                                                                | CQI activities in areas such as community-based health promotion and prevention | 0        | 2 (13%)       | 5 (24%)       | 16 (18%)       | 23 (18%)         |
|                                                                | Processes and approaches for CQI                                                | 0        | 7 (47%)       | 8 (38%)       | 30 (33%)       | 45 (35%)         |
| <b><i>Co-authorship network structural characteristics</i></b> |                                                                                 |          |               |               |                |                  |
| Density                                                        |                                                                                 | 1        | 0.45          | 0.47          | 0.11           | 0.13             |
| Average degree (organisations)                                 |                                                                                 | 2        | 5             | 10.9          | 8.1            | 9.8              |
| Centralisation (degree)                                        |                                                                                 | 0        | 0.65          | 0.57          | 0.55           | 0.53             |
| Clustering                                                     |                                                                                 | 1        | 0.80          | 0.86          | 0.81           | 0.79             |
| Geodesic distance                                              |                                                                                 | 1        | 1.5           | 1.5           | 2.1            | 2.1              |
| Diameter                                                       |                                                                                 | 1        | 2             | 2             | 3              | 3                |
| Core-periphery structure                                       |                                                                                 | 0        | 1 ( $p=.03$ ) | 1 ( $p=.01$ ) | 1 ( $p<.001$ ) | 0.42 ( $p=.83$ ) |

1 CQI: continuous quality improvement; IQR: interquartile range

## 2 **Linking people from a variety of organisations**

3 As shown in Table 3, there was an increase in the number and type of different organisations in the  
 4 network, with considerable growth from Phase 3 (24 organisations) to Phase 4 (72 organisations). Of  
 5 note, the number of Universities and Research Institutes increased from 15 in Phase 3 to 45 in Phase 4,  
 6 while Health Services rose from 2 to 11 and international organisations increased to 8. This growth in  
 7 different organisations participating in the research network over time was a result of existing  
 8 organisations continuing to publish together (yellow nodes), and new organisations co-authoring (blue  
 9 nodes) (Figure 1). A few organisations ceased publishing as part of the network (red nodes), shown as  
 10 'isolates'.

11 [INSERT FIGURE 1]

12 *Figure 1: Evolution of the quality improvement research network, 2002–2019*

## 13 **Relationships of organisations and structural characteristics**

14 The structural characteristics of the networks are based on the indicators shown in Table 3. Our analysis  
 15 of the network data shows a decrease in the network density. In Phase 2 and 3, the research network  
 16 was relatively well connected with ~46% of all possible relationships in the network actualised.  
 17 However, in Phase 4, with ~11% of all possible links existing between organisations, there was less  
 18 connectivity between organisations. The decrease in network density was linked to an increase in the

1  
2  
3 1 number of organisations publishing together in Phase 4, as noted above (Table 3), and an increase in  
4 the scope of CQI publications. However, the average clustering coefficient remained high across all  
5 2 phases (1, 0.80, 0.86, and 0.81 respectively), indicating a strong tendency for multiple organisations to  
6 3 be collaborating on individual publications. Part of this high effect is a natural consequence of authors  
7 4 publishing together – it introduces triangles of collaborating authors, thereby increasing the clustering  
8 5 co-efficient.  
9 6

10 7 From Table 3, we note that the average number of organisations collaborating directly on publications  
11 8 (average node degree) steadily increased from 2 in Phase 1, to 5, 10.9, and then 8.1 in subsequent  
12 9 phases. This is a sign that organisations collaborated more widely over time, with a small decrease in  
13 10 Phase 4. On average, publications involved 3.4 organisations, with 3.5 publications per organisation.  
14 11 This indicates a maturation of organisational relationships, typically creating more than one publication  
15 12 from each collaboration. Furthermore, network diameter was at-most 3 (Phase 4) and geodesic distance  
16 13 was at-most 2.1 (Phase 4). This indicates a close-knit cohesive network in which organisations were  
17 14 connected by no more than two other organisations, resulting in the network being unlikely to fragment  
18 15 and able to disseminate information quickly.

19 16 The degree-centralisation from Phase 2 was 0.65 followed by 0.57 and 0.55 in the subsequent phases.  
20 17 Conversely, the core-periphery analysis produced strong results in each phase (see Table 3). These  
21 18 analyses indicate that in all four phases the network was not connected via a single dominant central  
22 19 organisation but rather by a core-periphery structure that points to a more collaborative network.  
23 20 Intersectoral collaboration (research, government and/or health services) were represented in the core  
24 21 for phases 2 and 3 (green nodes in Figure 2). In Phase 4, the organisations comprising the core were all  
25 22 Universities or Research Institutes, indicating that Government Departments and Health Services were  
26 23 more likely to publish with them than with each other.

27  
28  
29  
30  
31  
32  
33  
34  
35  
36  
37  
38  
39  
40  
41 24 [INSERT FIGURE 2]

42  
43  
44 25 *Figure 2: Core periphery analysis by phases, 2002–2019*

## 45 26 **Equity in authorship**

46  
47  
48 27 Female first authors increased over time, growing from none in Phase 1 to 84% (n=76) in Phase 4 (Table  
49 28 3), with about 28% of the publications having a female senior or last author in all phases after the first.  
50 29 Although the number of publications led by Indigenous authors remained low, over time there was an  
51 30 increasing number and percentage with at least one Indigenous author. The greatest expansion was  
52 31 observed from Phase 3 to Phase 4 when the number of publications with at least one Indigenous author  
53 32 increased from 13 to 56 (Table 3).

## 54 33 **Providing opportunities for capacity strengthening**

1  
2  
3 1 Over time there was also an increase in absolute number (but a decline in percentage) of publications  
4 2 with at least one student or project officer author, from 2 in Phase 1 to 52 in Phase 4 (Table 3). Phase 4  
5 3 also saw an increase in student or project officer as lead author, with the largest growth in Phase 4 (28%,  
6 4 n=25) representing a two-fold increase from Phase 3 (14%, n=3).  
7  
8  
9

## 10 **Expansion of research themes**

11  
12 6 As the network evolved there was a notable growth in publications related to CQI and clinical care, an  
13 7 increase in publications related to social, environmental and behavioural determinants of health, and on  
14 8 the development of processes and approaches for CQI (Table 3). The growth in research themes in  
15 9 Phase 4 was consistent with the increase observed in the number of publications and organisations  
16 10 involved in this phase, and the emergence of new core organisations. Supplementary File 2 contains a  
17 11 listing of all publications and their assigned category of research themes.  
18  
19  
20  
21  
22  
23

## 24 **DISCUSSION**

25  
26 13 This study examined the growth of and changes in an Australian quality improvement research network  
27 14 over an 18-year period by assessing co-authorship of publications using network analysis. Key findings  
28 15 include an expansion in the number of publications; a greater number and diversity of organisations co-  
29 16 authoring; improvements in capacity strengthening measures reflected in increased student and project  
30 17 officer authorship and first author position; and a broadening or scaling-out(45) of quality improvement  
31 18 work to other thematic areas. There is evidence, too, that the research network linked people from a  
32 19 variety of organisations, including Universities or Research Institutes, PHC services and Government  
33 20 Departments, who might otherwise have never worked together. This expansion potentially extended  
34 21 both the impact of the network and of the organisations involved.  
35  
36  
37  
38  
39  
40

41 22 The characteristics of the network showed a strong collaborative structure and a maturation of  
42 23 organisational relationships, with more than one publication typically developed by each collaborating  
43 24 organisation. Network analyses indicated a core-periphery structure of organisations connected to each  
44 25 other in each phase, rather than a network structured around a single central organisation. As there was  
45 26 the same Chief Investigator throughout the study period, this finding of a core-periphery structure  
46 27 indicates the network expanded to have other core organisations over time, and was not just centred on  
47 28 the Chief Investigators organisation. In phases 2 and 3, the relationships between research institutions  
48 29 and government departments were well represented in the network core. The network's founding  
49 30 partners maintained a consistent presence as members of the core, indicating that it remained dependent  
50 31 on these partners for collaboration. However, new core organisations emerged when key authors  
51 32 changed institutions, reflecting that individuals stimulated the expansion of core members. For example,  
52 33 a result of key individuals moving institutions and growing the publishing base was a Phase 4 core  
53 34 comprised solely of Universities and Research Institutes, while Health Service and Government  
54  
55  
56  
57  
58  
59  
60

1  
2  
3 1 Organisations were part of the core in the earlier phases. This change occurred despite a large increase  
4  
5 2 in the number and type of organisations involved in the network in Phase 4.

6  
7 3 Network growth was greatest in Phase 4, when funding was received from the Australian Government's  
8  
9 4 NHMRC to establish a Centre for Research Excellence and the network's structure and function(12)  
10  
11 5 evolved to that of an 'innovation platform.'(26) Used as a vehicle to stimulate and support multi-  
12  
13 6 stakeholder collaboration and learning, 'innovation platforms' provide a space of interaction to facilitate  
14  
15 7 the development and emergence of innovations when there are complex, system-wide issues requiring  
16  
17 8 coordinated action and collective problem solving. Most extensively applied in international  
18  
19 9 agricultural development, and to a limited extent in health, innovation platforms differ from other  
20  
21 10 networks by the incorporation of a wider network of stakeholders at multiple levels of the system and  
22  
23 11 in different roles; the concept of "sector boundary spanning" that brings in stakeholders from other  
24  
25 12 sectors to assist in developing health care solutions; and application of continuous reflection, learning  
26  
27 13 and adaptation as central design elements.(26, 27)

28  
29 14 These findings support previous literature that researchers tend to collaborate with like-minded others,  
30  
31 15 but that this tendency toward homophily can be disrupted by implementing policies that encourage  
32  
33 16 interdisciplinary collaboration and purposeful research translation – such as was done with the  
34  
35 17 innovation platform.(14) Although the purposeful adjustment to an 'innovation platform' was  
36  
37 18 associated with an expansion of activity among the network and new thematic scope in publications,  
38  
39 19 this acceleration could also reflect other inter-related factors, such as longer-term relationships, and an  
40  
41 20 increase in funding.

42  
43 21 Furthermore, the earlier phases were focused on supporting PHC services to implement and embed  
44  
45 22 quality improvement techniques through participatory action research. Access to the CQI dataset  
46  
47 23 formed the basis of research collaborations between those services and University and Research  
48  
49 24 Institutes to undertake data analyses that resulted in publications up to 2019. Though there were 175  
50  
51 25 PHC services providing data to the research collaboration, only 11 Health Services co-authored  
52  
53 26 publications. While not necessarily co-authors, Health Services made important contributions to  
54  
55 27 implementing research, collecting data, and importantly – to interpretation and analysis of findings.

56  
57 28 Our findings build on a prior social network analysis of partners in the research network which was  
58  
59 29 undertaken as part of an interim evaluation in Phase 3 of the research network. Cunningham and her  
60  
1 30 co-authors(46) found an increase in network density (43% to 59%) from 2013 to 2014, indicating an  
2 31 increase over time in connectivity and communication between partner organisations. A major element  
3 32 in achieving the goals of that phase of research was the network's focus on developing a shared database  
4 33 of de-identified CQI data from Indigenous PHC centres.(46) The importance to the research network of  
5 34 collecting and sharing data is supported by the experiences of other research collaborations.(47, 48)  
6 35 Furthermore, the high level of trust identified across the network is indicative of a properly functioning



1  
2  
3 1 collaboration.(49) The growth in Phase 4 leveraged the high level of trust already established. The  
4 2 decreasing degree of centralisation scores are consistent with findings reported by Cunningham et  
5 3 al.(46), and reflect the shift towards more organisations taking a greater role in publishing. Increasing  
6 4 the number of diverse collaborations and creating a more decentralised network has been shown to  
7 5 improve productivity and increase the potential for high-impact science.(50)

8 6 Equity and capacity strengthening are promoted as core elements of research networks.(12, 51) The  
9 7 research network, particularly when operating as an innovation platform, made some progress in  
10 8 addressing concerns about the imbalances between Indigenous and non-Indigenous authors when  
11 9 writing about Indigenous issues. However, despite an increased number of publications with Indigenous  
12 10 authors, especially in Phase 4, there remains a paucity of Indigenous first or senior/last authors. Further  
13 11 work is needed to redress the inequities these imbalances represent, a concern echoed in global health  
14 12 literature.(52) The latest iteration of the research network was recently launched with funding for a new  
15 13 Centre for Research Excellence in Strengthening Systems for Indigenous Health Care Equity (2020–  
16 14 2024) (CRE-STRIDE) (NHMRC Grant Id #1170882). This Centre marks the beginning of a new  
17 15 Indigenous leadership structure for the research network with more than half of the research  
18 16 investigators, including the Chief Investigator, identifying as Indigenous. It also aims to extend and  
19 17 further support the use of CQI methods in sectors with responsibility for addressing social and cultural  
20 18 determinants of health and to enhance community participation in CQI processes.(28)

## 21 19 **Strengths and limitations of the study**

22 20 A study strength was the long timeframe of 18 years of publications. Although co-authorship is only  
23 21 one indicator of collaboration, there are several advantages to relying on it as a proxy for assessing the  
24 22 level of research collaboration, including its verifiability, stability over time, availability of data in the  
25 23 public domain and ease of measurement.(11)

26 24 As the aim of the study was to assess growth and change in the research collaboration over time, we  
27 25 applied an unweighted method to the network analysis. This approach was chosen for a number of  
28 26 reasons. Firstly, the interpretability would be compromised by weighting edges, in the context of the  
29 27 questions we wished to answer. We moved all of the information that would have otherwise been  
30 28 embedded into a weight to separate descriptive analyses available in Table 3. Secondly, given the  
31 29 temporal nature of collaborations we did not wish to make erroneous assumptions that quantity of  
32 30 publications is a substitute for quality. For example, it is difficult to compare a collaboration that  
33 31 generates only one high impact publication to a collaboration that may produce a larger number of lower  
34 32 impact publications. Weighting by publication numbers could therefore introduce a bias that may lead  
35 33 to erroneous interpretation of the findings.

1  
2  
3 1 Limitations of this study include: 1) many collaborative efforts are not reflected in co-authorship  
4 2 metrics. We are undertaking other studies to address this as part of the overall evaluation of the CRE-  
5 3 IQI. Other measures of collaborative ties include having co-investigators on submitted or funded grants,  
6 4 on conference presentations and as authors of grey literature, all of which may be useful to broaden the  
7 5 definition of collaboration in our innovation platform. However, we assumed that, in most cases, co-  
8 6 authorship indicates an active cooperation between partners beyond the simple exchange of material or  
9 7 information. 2) This analysis does not capture the collaborations that continue to occur through co-  
10 8 authorship or other means that are not necessarily related to the research network. For example, a  
11 9 collaboration formed by co-authoring on a CRE-IQI manuscript might lead to collaboration on other  
12 10 projects and research not reflected in this analysis. 3) Because there is a substantial lead-time for an  
13 11 academic publication, a writing collaboration that might have commenced in an earlier phase of work  
14 12 may not have been published until a later phase. Thus publication in one phase can arise from substantial  
15 13 work in a previous phase. 4) Although multiple authorship affiliations are increasingly recognised as  
16 14 facilitating knowledge exchange and becoming more widespread,(53) our analysis does not include the  
17 15 multiple affiliations of many of the authors and so may under-report the level of collaboration.  
18 16 Similarly, only representing the University affiliation, and not the actual Department in which an author  
19 17 works, obscures collaboration between Departments in the same University. 5) Three of the eleven  
20 18 authors on this manuscript (RSB, JB and VM) had published more than 20 manuscripts included in this  
21 19 analysis, and RSB was the Chief Investigator on the research network during this period. Given this,  
22 20 and to mitigate against bias, BP who has not published as part of this network undertook the network  
23 21 analysis and a blind review process for categorising the manuscripts, with discrepancies discussed.

22 22 To the best of our knowledge, this study is the first to describe a CQI research network using co-  
23 23 authorship network analysis. While the generalisability of the findings may be limited to similar  
24 24 networks, the methodological approach could readily be transferred. In this study we did not set out to  
25 25 demonstrate a link between an expansion of the collaboration and engagement with impact or  
26 26 improvement in the quality of care. However, it is widely recognised in the literature, that increasing  
27 27 collaboration and engagement across health services, researchers and policy makers is a critically  
28 28 important element along the causal change pathway to improving the quality of care and achieving  
29 29 impact. Methods such as co-authorship analysis are useful for demonstrating a pathway to research  
30 30 impact related to engagement, which traditionally tends to rely on the quantity of outputs rather than on  
31 31 the strengthening of networks and the scope of work undertaken.

## 32 CONCLUSION

33 33 Over the 18-year timeframe, collaboration in publications increased with network consolidation and  
34 34 expansion. Publication outputs accelerated in the final phase, coinciding with a broader thematic focus



1  
2  
3 1 and an increase in the number and diversity of participating organisations. This expansion occurred  
4 2 largely due to the cumulative effect of building trust and relationships over time, including the  
5 3 development of a comprehensive dataset for use by all stakeholders. The findings highlight the benefits  
6 4 of long-term relationship building among diverse partners to support participatory research in quality  
7 5 improvement. Increased productivity was associated with increased authorship diversity and a  
8 6 decentralised network, suggesting these may be important factors in enhancing research impact and  
9 7 advancing the knowledge and practice of CQI in primary health care. Despite improvements, further  
10 8 work is needed to address inequities in female authorship and Indigenous authorship. The co-authorship  
11 9 analysis has been useful for demonstrating research impacts related to collaboration, which are not well  
12 10 captured by metrics such as quantity of outputs.  
13  
14  
15  
16  
17  
18  
19  
20  
21  
22  
23  
24  
25  
26  
27  
28  
29  
30  
31  
32  
33  
34  
35  
36  
37  
38  
39  
40  
41  
42  
43  
44  
45  
46  
47  
48  
49  
50  
51  
52  
53  
54  
55  
56  
57  
58  
59  
60

1  
2  
3 **1 Declarations**  
4

5 **2 Ethics approval:** University of Sydney Human Research Ethics Committee (Project 2018/206) and the  
6 Human Research Ethics Committee of the Northern Territory Department of Health and Menzies  
7 School of Health Research (Project 2018-3105).  
8  
9

10 **5 Consent for publication:** Not applicable  
11  
12

13 **6 Availability of data and material:** Not applicable  
14

15 **7 Competing interests:** The authors declare that this research was conducted in the absence of any  
16 commercial or financial relationships that could be construed as a potential conflict of interest.  
17  
18

19 **9 Funding:** The National Health and Medical Research Council ([www.nhmrc.gov.au](http://www.nhmrc.gov.au)) funded the Centre  
20 for Research Excellence in Integrated Quality Improvement (#1078927). In-kind support has been  
21 provided by a range of community-controlled and government agencies.  
22  
23

24 **12 Author's information:** RSB was the Chief Investigator of the research network from 2002 – 2019.  
25 RSB, JB, VM, AL, FCC, RGB, and AL had published 5 or more publications as part of this research  
26 network. RGB and VM are both Indigenous researchers: RGB is from the Gungarri/Kunja nations in  
27 South-Western Queensland and VM from the Quandamooka community on North Stradbroke Island,  
28 Queensland. JB, BAP, RSB, DP, AL, SA, KPC, MEP and FCC are non-Indigenous researchers. All  
29 authors have a long-standing commitment to improving health outcomes for Aboriginal and Torres  
30 Strait Islander people.  
31  
32  
33  
34  
35

36 **19 Acknowledgements:** The development of this manuscript would not have been possible without the  
37 active support, enthusiasm and commitment of staff in participating primary health care services, and  
38 members of the research collaboration various phases of the research collaboration. We would like to  
39 acknowledge the Centre for Research Excellence in Integrated Quality Improvement (CRE-IQI)  
40 evaluation working group for its role in guiding the implementation of the multi-pronged evaluation of  
41 the CRE-IQI: Jodie Bailie, Roxanne Bainbridge, Ross Bailie, Alison Laycock, Boyd Potts, Shanthi  
42 Ramanathan, Andrew Searles, Frances Cunningham and Chris Doran. We would like to thank Kerryn  
43 Harkin for compiling and maintaining project records, and for organising workshops and meetings,  
44 Frances Cunningham for her contributions to the application of the network methodology, Dan  
45 Chamberlain for his expert review of the methodology, Svetlana Andrienko for the reproduction of  
46 images, and Jane Yule for her editing and proofreading support.  
47  
48  
49  
50  
51  
52  
53

54 **30 Authors' contributions:** JB, BAP and RSB conceived the manuscript, with JB taking the lead on  
55 writing on all drafts, integrating feedback upon reviews and finalising the manuscript. BAP undertook  
56 the analysis and provided input into the drafting of the methods and conceptual design. All authors  
57 contributed to revisions of the manuscript and approved its final version.  
58  
59  
60

## 1 REFERENCES

1. Bailie R, Matthews V, Larkins S, et al. Impact of policy support on uptake of evidence-based continuous quality improvement activities and the quality of care for Indigenous Australians: a comparative case study. *BMJ Open*. 2017;7(10):e016626.
2. Sibthorpe B, Gardner K, Chan M, Dowden M, Sargent G, McAullay D. Impacts of continuous quality improvement in Aboriginal and Torres Strait Islander primary health care in Australia: A scoping systematic review. *J Health Organ Manag*. 2018;32(4):545-571.doi10.1108/JHOM-02-2018-0056.
3. Taylor MJ, McNicholas C, Nicolay C, et al. Systematic review of the application of the plan-do-study-act method to improve quality in healthcare. *BMJ Qual Saf*. 2014;23(4):290-8. doi:10.1136/bmjqs-2013-001862
4. O'Neill SM, Hempel S, Lim YW, et al. Identifying continuous quality improvement publications: what makes an improvement intervention 'CQI'? *BMJ Qual Saf*. 2011;20(12):1011-1019. doi:10.1136/bmjqs.2010.050880
5. Matthews V, Schierhout G, McBroom J, et al. Duration of participation in continuous quality improvement: a key factor explaining improved delivery of Type 2 diabetes services. *BMC Health Serv Res*. 2014;14:578.doi:10.1186/s12913-014-0578-1
6. Bailie R, Matthews V, Brands J, et al. A systems-based partnership learning model for strengthening primary healthcare. *Implement Sci*. 2013;8(1):143. doi:10.1186/1748-5908-8-143
7. Dixon-Woods M. How to improve healthcare improvement—an essay by Mary Dixon-Woods. *BMJ*. 2019;367:l5514. doi:10.1136/bmj.l5514
8. Oliver K, Kothari A, Mays N. The dark side of coproduction: do the costs outweigh the benefits for health research? *Health Res Policy Syst*. 2019;17(1):33.doi:10.1186/s12961-019-0432-3
9. Holbrook JA, Wixted B, Lewis BS, et al. The Structure and Construction of Formal Research Networks: A Policy Oriented Understanding of Stakeholder Engagement. Simon Fraser University, Vancouver, BC; 2011.<<http://summit.sfu.ca/item/13636>>, accessed 6<sup>th</sup> May 2020.
10. Varda DM, Retrum JH. An exploratory analysis of network characteristics and quality of interactions among public health collaboratives. *J Public Health Res*. 2012;1(2):170-176.doi:10.4081/jphr.2012.e27
11. Katz JS, Martin BR. What is research collaboration? *Research Policy*. 1997;26(1):1-18.
12. VanderZanden A, Langlois EV, Ghaffar A, et. It takes a community: a landscape analysis of global health research consortia. *BMJ Glob Health*. 2019;4(Suppl 8):e001450.doi:10.1136/bmjgh-2019-001450
13. Fonseca BdeP, Sampaio RB, Fonseca MVda, et al. Co-authorship network analysis in health research: method and potential use. *Health Res Policy Syst*. 2016;14(1):34.doi:10.1186/s12961-016-0104-5
14. Fagan J, Eddens KS, Dolly J, et al. Assessing research collaboration through co-authorship network analysis. *J Res Adm*. 2018;49(1):76-99.
15. Newman MEJ. Coauthorship networks and patterns of scientific collaboration. *Proceedings of the National Academy of Sciences*. 2004;101(suppl 1):5200-5.

- 1  
2  
3 16. Schneider EC, Sarnak DO, Squires D, et al. *Mirror Mirror 2017: International Comparison*  
4 *Reflects Flaws and Opportunities for Better U.S. Health Care*. 2017. New York, NY: Commonwealth  
5 Fund. <<https://interactives.commonwealthfund.org/2017/july/mirror-mirror/>>, accessed 6<sup>th</sup> May 2020.  
6  
7 17. Australian Health Ministers' Advisory Council. *Aboriginal and Torres Strait Islander Health*  
8 *Performance Framework*. Canberra: Department of the Prime Minister and Cabinet; 2017.  
9 <[https://www.niaa.gov.au/resource-centre/indigenous-affairs/health-performance-framework-2017-](https://www.niaa.gov.au/resource-centre/indigenous-affairs/health-performance-framework-2017-report)  
10 [report](https://www.niaa.gov.au/resource-centre/indigenous-affairs/health-performance-framework-2017-report)>, accessed 25<sup>th</sup> May 2020.  
11  
12 18. Bailie J, Schierhout G, Laycock A, et al. Determinants of access to chronic illness care: a  
13 mixed-methods evaluation of a national multifaceted chronic disease package for Indigenous  
14 Australians. *BMJ Open*. 2015;5(11):e008103.doi:10.1136/bmjopen-2015-008103  
15  
16 19. Australian Indigenous HealthInfoNet. *Overview of Aboriginal and Torres Strait Islander health*  
17 *status 2019*. Perth: Australian Indigenous HealthInfoNet ; 2020.  
18 <[https://healthinonet.ecu.edu.au/learn/health-facts/overview-aboriginal-torres-strait-islander-health-](https://healthinonet.ecu.edu.au/learn/health-facts/overview-aboriginal-torres-strait-islander-health-status/)  
19 [status](https://healthinonet.ecu.edu.au/learn/health-facts/overview-aboriginal-torres-strait-islander-health-status/)>, accessed 25<sup>th</sup> May 2020.  
20  
21 20. Durey A, Thompson SC. Reducing the health disparities of Indigenous Australians: time to  
22 change focus. *BMC Health Serv Res*. 2012;12:151.doi:10.1186/1472-6963-12-151  
23  
24 21. Shortell SM, Bennett CL, Byck GR. Assessing the impact of continuous quality improvement  
25 on clinical practice: what it will take to accelerate progress. *Milbank Q*. 1998;76(4):593-510.  
26 doi:10.1111/1468-0009.00107  
27  
28 22. Bailie R, Si D, Shannon C, et al. Study protocol: national research partnership to improve  
29 primary health care performance and outcomes for Indigenous peoples. *BMC Health Serv Res*.  
30 2010;10:129.doi:10.1186/1472-6963-10-129  
31  
32 23. Hayward MN, Mequanint S, Paquette-Warren J, et al. The FORGE AHEAD clinical readiness  
33 consultation tool: a validated tool to assess clinical readiness for chronic disease care mobilization in  
34 Canada's First Nations. *BMC Health Serv Res*. 2017;17(1):233.doi:10.1186/s12913-017-2175-6  
35  
36 24. Bailie RS, Si D, Togni SJ, et al. A multifaceted health-service intervention in remote Aboriginal  
37 communities: 3-year follow-up of the impact on diabetes care. *Med J Aust*. 2004;181(4):195-200.  
38  
39 25. Bailie R, Si D, Connors C, et al. Study protocol: audit and best practice for chronic disease  
40 extension (ABCDE) project. *BMC Health Serv Res*. 2008;8:184.doi:10.1186/1472-6963-8-184  
41  
42 26. Bailie J, Cunningham FC, Bainbridge RG, et al. Comparing and contrasting 'innovation  
43 platforms' with other forms of professional networks for strengthening primary healthcare systems for  
44 Indigenous Australians. *BMJ Glob Health*.2018;3(3):e000683corr1.doi:10.1136/bmjgh-2017-  
45 000683corr1  
46  
47 27. Bailie J, Laycock AF, Peiris D, et al. Using developmental evaluation to enhance continuous  
48 reflection, learning and adaptation of an innovation platform in Australian Indigenous primary  
49 healthcare. *Health Res Policy Syst*. 2020;18(1):45.doi:10.1186/s12961-020-00562-4  
50  
51 28. Laycock A, Conte K, Harkin K, et al. *Improving the Quality of Primary Health Care for*  
52 *Aboriginal and Torres Strait Islander Australians. Centre for Research Excellence in Integrated*  
53 *Quality Improvement 2015–2019: Messages for Action, Impact and Research*. Lismore NSW:  
54 University Centre for Rural Health, The University of Sydney; 2019. < [https://ucrh.edu.au/cre-iqui-](https://ucrh.edu.au/cre-iqui-resources/)  
55 [resources](https://ucrh.edu.au/cre-iqui-resources/)>, accessed 25 May 2020.  
56  
57 29. Bailie RS, Togni SJ, Si D, Robinson G, et al. Preventive medical care in remote Aboriginal  
58 communities in the Northern Territory: a follow-up study of the impact of clinical guidelines,  
59  
60

- 1  
2  
3 1 computerised recall and reminder systems, and audit and feedback. *BMC Health Serv Res.*  
4 2003;3(1):15.doi:10.1186/1472-6963-3-15  
5  
6 30. Cunningham FC, Ferguson-Hill S, Matthews V, et al. Leveraging quality improvement through  
7 4 use of the Systems Assessment Tool in Indigenous primary health care services: a mixed methods study.  
8 5 *BMC Health Serv Res.* 2016;16(1):583.doi:10.1186/s12913-016-1810-y  
9  
10 31. Bailie J, Schierhout G, Cunningham F, Yule J, Laycock A, Bailie R. *Quality of primary health*  
11 7 *care for Aboriginal and Torres Strait Islander people in Australia: Key research findings and messages*  
12 8 *for action from the ABCD National Research Partnership.* Menzies School of Health Research. May  
13 9 2015. <<https://apo.org.au/node/55532>>, accessed 25<sup>th</sup> May 2020.  
14  
15 32. McPhail-Bell K, Matthews V, Bainbridge R, et al. An "All Teach, All Learn" approach to  
16 11 research capacity strengthening in Indigenous primary health care continuous quality improvement.  
17 12 *Front Public Health.* 2018;6:107.doi:10.3389/fpubh.2018.00107  
18  
19 33. Schierhout G, Brands J, Bailie R. *Audit and Best Practice for Chronic Disease Extension*  
20 14 *Project, 2005–2009: Final Report.* The Lowitja Institute, Melbourne.  
21 15 2010.<[https://www.lowitja.org.au/content/Document/ABCDE\\_Report2011.pdf](https://www.lowitja.org.au/content/Document/ABCDE_Report2011.pdf)>, accessed 25<sup>th</sup> May  
22 16 2020  
23  
24 34. McCalman J, Bailie R, Bainbridge R, et al. Continuous quality improvement and  
25 18 comprehensive primary health care: A systems framework to improve service quality and health  
26 19 outcomes. *Front Public Health.* 2018;6:76.doi:10.3389/fpubh.2018.00076  
27  
28 35. Bailie J, Laycock A, Matthews V, et al. System-level action required for wide-scale  
29 20 improvement in quality of primary health care: Synthesis of feedback from an interactive process to  
30 21 promote dissemination and use of aggregated quality of care data. *Front Public Health.* 2016;4:86.  
31 22 doi:10.3389/fpubh.2016.00086  
32 23  
33 36. Bailie J, Matthews V, Laycock A, et al. Rigorous follow-up systems for abnormal results are  
34 24 essential to improve health outcomes for Aboriginal and Torres Strait Islander people. *Aust J Prim*  
35 25 *Health.* 2018;24(1):1-3.doi:10.1071/PY17103  
36 26  
37 37. Laycock A, Bailie J, Matthews V, Bailie R. Interactive dissemination: engaging stakeholders  
38 27 in the use of aggregated quality improvement data for system-wide change in Australian Indigenous  
39 28 primary health care. *Front Public Health.* 2016;4:84.  
40 29  
41 38. *Python Language Reference.* Python Software Foundation, <<http://www.python.org>>,  
42 30 accessed 25<sup>th</sup> May 2020  
43 31  
44 39. Kluyver T, Ragan-Kelley B, Pérez F, et al. Jupyter Notebooks-a publishing format for  
45 32 reproducible computational workflows. *ELPUB*; 2016.pp.87-90.  
46 33  
47 40. *Anaconda Software Distribution.* Anaconda 2016. <<https://anaconda.com>>, accessed 25<sup>th</sup> May  
48 34 2020  
49 35  
50 41. Hagberg A, Swart P, S Chult D. *Exploring network structure, dynamics, and function using*  
51 36 *NetworkX.* Los Alamos National Lab.(LANL), Los Alamos, NM (United States); 2008.  
52 37  
53 42. Bastian M, Heymann S, Jacomy M, editors. Gephi: an open source software for exploring and  
54 38 manipulating networks. *Third International AAAI Conference on Weblogs and Social Media*;2009.  
55 39  
56 43. Borgatti SP, Everett MG. Models of core/periphery structures. *Social Networks.*  
57 40 2000;21(4):375-95.  
58 41  
59  
60



- 1  
2  
3 1 44. Kojaku S, Masuda N. A generalised significance test for individual communities in networks.  
4 2 *Sci Rep.* 2018;8(1):7351.doi:10.1038/s41598-018-25560-z  
5  
6 3 45. Aarons GA, Sklar M, Mustanski B, et al. “Scaling-out” evidence-based interventions to new  
7 4 populations or new health care delivery systems. *Implement Sci.*017;12(1):111.doi:10.1186/s13012-  
8 5 017-0640-6  
9  
10 6 46. Cunningham FC, Matthews V, Sheahan A, et al. Assessing Collaboration in a National  
11 7 Research Partnership in Quality Improvement in Indigenous Primary Health Care: A Network  
12 8 Approach. *Front Public Health.* 2018;6:182.doi:10.3389/fpubh.2018.00182  
13  
14 9 47. Aveling EL, Martin G, Armstrong N, et al. Quality improvement through clinical communities:  
15 10 eight lessons for practice. Journal of health organization and management. 2012. *J Health Organ*  
16 11 *Manag.* 2012;26(2):158-174.doi:10.1108/14777261211230754  
17  
18 12 48. Perrino T, Howe G, Sperling A, Beardslee W, Sandler I, Shern D, et al. Advancing Science  
19 13 Through Collaborative Data Sharing and Synthesis. *Perspect Psychol Sci.* 2013;8(4):433-444.  
20 14 doi:10.1177/1745691613491579  
21  
22 15 49. Mattessich P, Johnson K. Collaboration: *What Makes it Work. A Review of Research Literature*  
23 16 *on factors Influencing Successful Collaborations.* 3rd Edition ed. New York: Fieldstone Alliance; 2018.  
24  
25 17 50. Yousefi-Nooraie R, Akbari-Kamrani M, Hanneman RA, Etemadi A. Association between co-  
26 18 authorship network and scientific productivity and impact indicators in academic medical research  
27 19 centers: A case study in Iran. *Health Res Policy Syst.* 2008;6:9.doi:10.1186/1478-4505-6-9  
28  
29 20 51. Parker M, Kingori P. Good and bad research collaborations: researchers’ views on science and  
30 21 ethics in global health research. *PLoS One.* 2016;11(10):e0163579.doi:10.1371/journal.pone.0163579  
31  
32 22 52. Abimbola S. The foreign gaze: authorship in academic global health. *BMJ Glob Health.*  
33 23 2019;4(5):e002068.doi:10.1136/bmjgh-2019-002068  
34  
35 24 53. Hottenrott H, Lawson C. A first look at multiple institutional affiliations: a study of authors in  
36 25 Germany, Japan and the UK. *Scientometrics.* 2017;111(1):285-295.doi:10.1007/s11192-017-2257-6  
37  
38  
39  
40  
41  
42  
43  
44  
45  
46  
47  
48  
49  
50  
51  
52  
53  
54  
55  
56  
57  
58  
59  
60

Phase 1 2002–2004

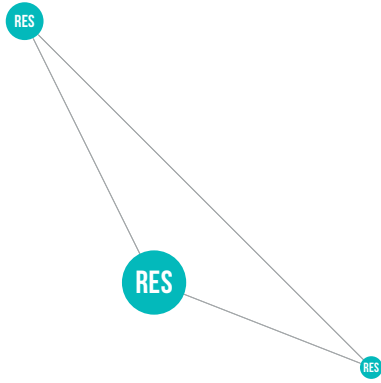

Phase 2 2005–2009

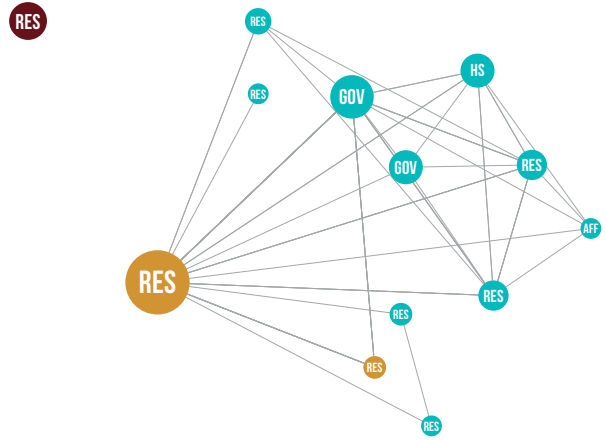

Phase 3 2010–2014

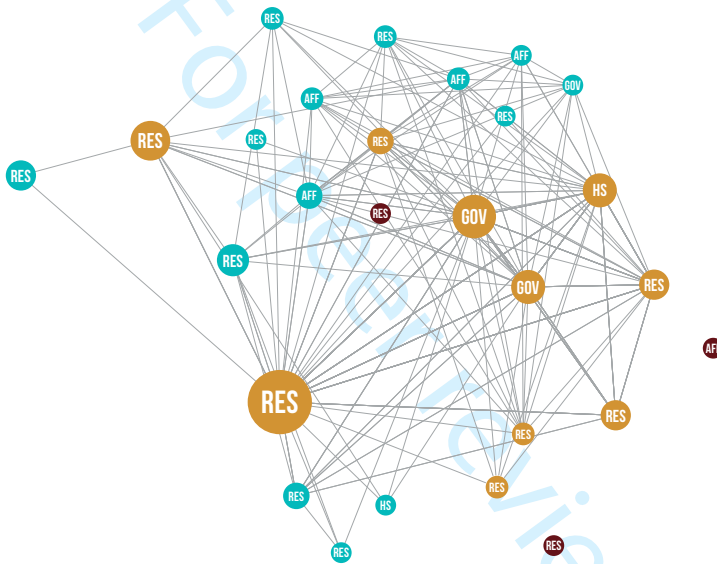

- RES** University or Research Institute
- HS** Health Service
- GOV** Government Department
- AFF** Affiliate
- NGO** Non-Government Organisation
- PHN** Primary Health Network
- New to network
- Left network
- Existing or former member

Phase 4 2015–2019

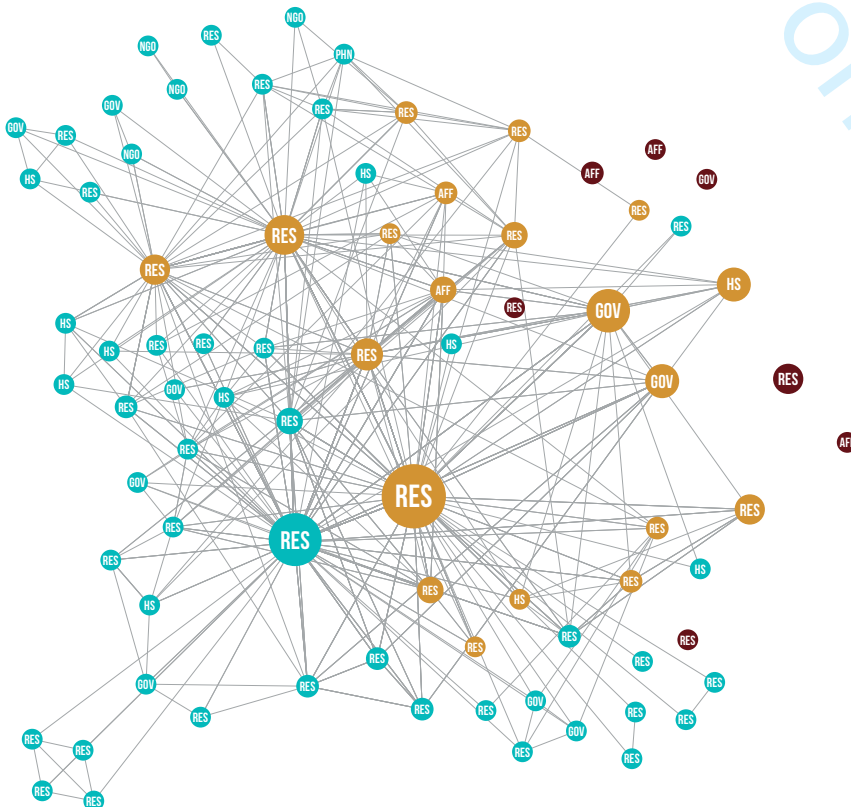

Phase 1 2002–2004

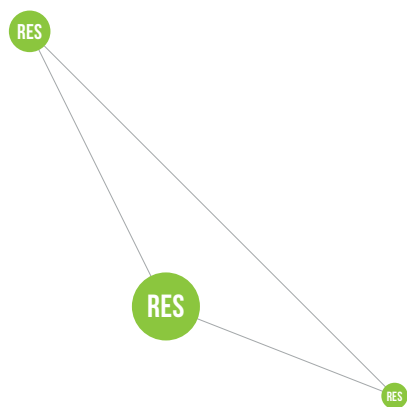

Phase 2 2005–2009

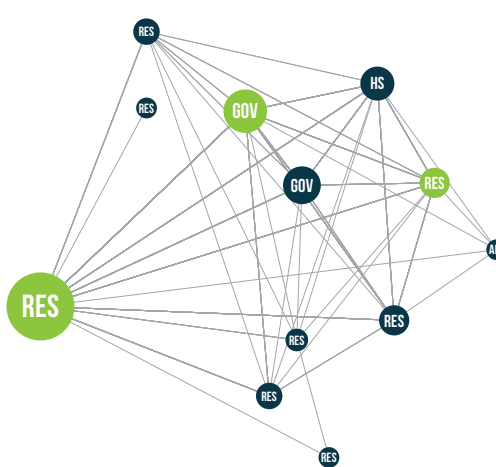

Phase 3 2010–2014

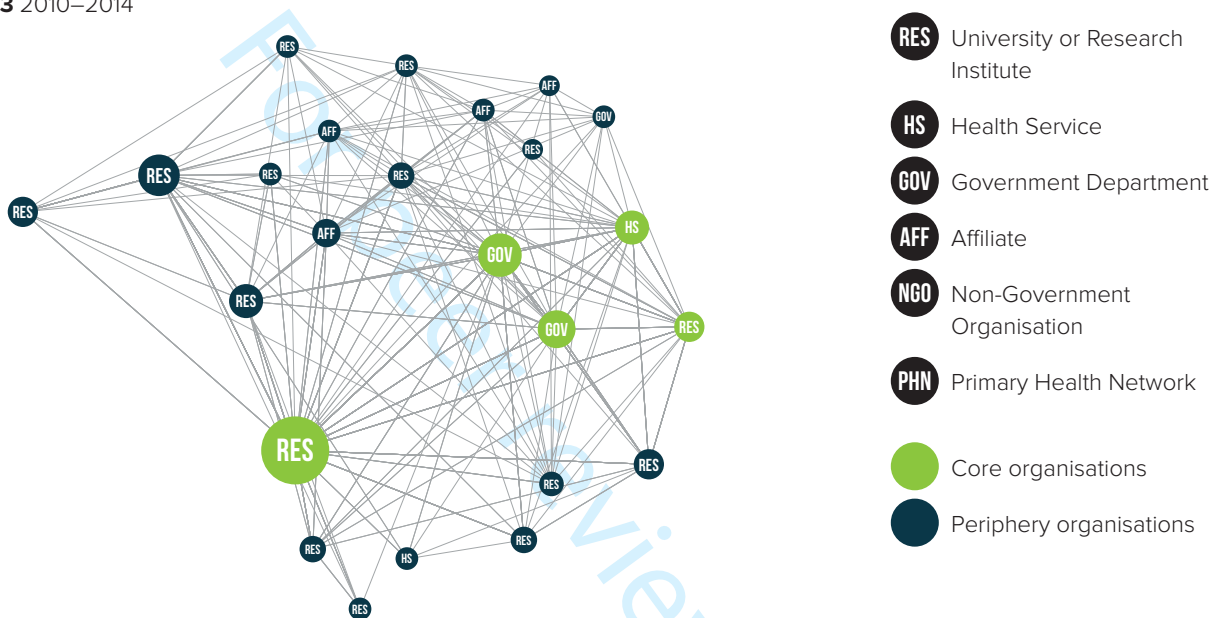

Phase 4 2015–2019

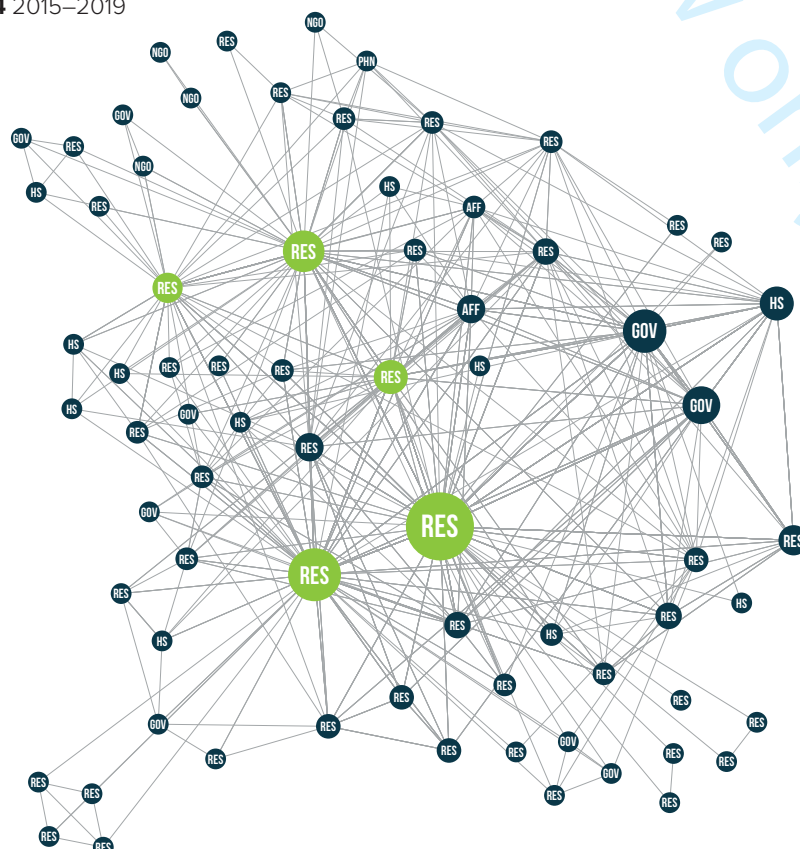



**SUPPLEMENTARY FILE 1**

*Table S1: Total number of publications, per author, for those who have published 5 or more as part of the research collaboration, 2002–2019*

| Author name (last_first)  | Total number of publications |
|---------------------------|------------------------------|
| Bailie_Ross               | 97                           |
| Matthews_Veronica         | 36                           |
| Thompson_Sandra           | 21                           |
| Tsey_Komla                | 21                           |
| Bailie_Jodie              | 21                           |
| Si_Damin                  | 20                           |
| Connors_Christine         | 20                           |
| Dowden_Michelle           | 17                           |
| O'Donoghue_Lynette        | 15                           |
| Weeramanthri_Tarun        | 14                           |
| Larkins_Sarah             | 13                           |
| Kennedy_Catherine         | 12                           |
| Schierhout_Gill           | 12                           |
| Cunningham_Frances        | 12                           |
| Clelland (Percival)_Nikki | 11                           |
| Laycock_Alison            | 11                           |
| Kwedza_Ru                 | 10                           |
| Bainbridge_Roxanne        | 10                           |
| Cox_Rhonda                | 9                            |
| Brown_Alex                | 9                            |
| McCalman_Janya            | 9                            |
| Robinson_Gary             | 8                            |
| Liddle_Helen              | 8                            |
| Burke_Hugh                | 8                            |
| Rumbold_Alice             | 7                            |
| Boyle_Jacqueline          | 7                            |
| Gardner_Karen             | 6                            |
| Ralph_Anna                | 6                            |
| Burgess_Paul              | 6                            |
| Nagel_Tricia              | 5                            |
| Moore_Elizabeth           | 5                            |

|                   |   |
|-------------------|---|
| Doran_Chris       | 5 |
| Garvey_Gail       | 5 |
| Valery_Patricia   | 5 |
| Kinchin_Irina     | 5 |
| McAullay_Dan      | 5 |
| McAuley_Kimberley | 5 |
| Strobel_Natalie   | 5 |
| Edmond_Karen      | 5 |
| Onnis_Leigh-Ann   | 5 |

For peer review only

SUPPLEMENTARY FILE 2

Table S1: Publications included in the analysis, phase and research theme allocation, 2002–2019

|                                                                                                                                                                                                                                                                                          | Phases of research collaboration |                      |                      |                      | Categories of research themes |                                                                     |                                  |
|------------------------------------------------------------------------------------------------------------------------------------------------------------------------------------------------------------------------------------------------------------------------------------------|----------------------------------|----------------------|----------------------|----------------------|-------------------------------|---------------------------------------------------------------------|----------------------------------|
|                                                                                                                                                                                                                                                                                          | Phase 1: 2002 – 2004             | Phase 2: 2005 – 2009 | Phase 3: 2010 – 2014 | Phase 4: 2015 – 2019 | CQI in PHC Clinical care      | CQI activities in social, environmental or behavioural determinants | Processes and approached for CQI |
| Bailie RS, Togni SJ, Si D, et al. Preventive medical care in remote Aboriginal communities in the Northern Territory: a follow-up study of the impact of clinical guidelines, computerised recall and reminder systems, and audit and feedback. <i>BMC Health Serv Res</i> 2003;3(1):15. | 1                                |                      |                      |                      | 1                             |                                                                     |                                  |
| Bailie RS, Si D, Togni SJ, et al. A multifaceted health-service intervention in remote Aboriginal communities: 3-year follow-up of the impact on diabetes care. <i>MJA</i> 2004;181(4):195–200.                                                                                          | 1                                |                      |                      |                      | 1                             |                                                                     |                                  |
| Si D, Bailie R, Connors C, et al. Assessing health centre systems for guiding improvement in diabetes care. <i>BMC Health Serv Res</i> 2005;5(1):56.                                                                                                                                     |                                  | 1                    |                      |                      | 1                             |                                                                     |                                  |
| Wayte KJ, Bailie RS, Stephenson P. Improving the feedback of housing information to Indigenous communities. <i>Environmental Health</i> 2005;5(2):36.                                                                                                                                    |                                  | 1                    |                      |                      |                               | 1                                                                   |                                  |
| Bailie RS, Wayte KJ. A continuous quality improvement approach to Indigenous housing and health. <i>Environmental Health</i> 2006;6(2):36–41.                                                                                                                                            |                                  | 1                    |                      |                      |                               | 1                                                                   |                                  |
| Bailie RS, Robinson G, Kondalsamy-Chennakesavan SN, et al. Investigating the sustainability of outcomes in a chronic disease treatment programme. <i>Soc Sci Med</i> 2006;63(6):1661–70.                                                                                                 |                                  | 1                    |                      |                      | 1                             |                                                                     |                                  |
| Bailie R, Si D, Dowden M, et al. Improving organisational systems for diabetes care in Australian Indigenous communities. <i>BMC Health Serv Res</i> 2007;7(1):67.                                                                                                                       |                                  | 1                    |                      |                      | 1                             |                                                                     |                                  |
| Bailie RS, Si D, O’Donoghue L, et al. Indigenous health: effective and sustainable health services through continuous quality improvement. <i>MJA</i> 2007;186(10):525–7.                                                                                                                |                                  | 1                    |                      |                      |                               |                                                                     | 1                                |
| Si D, Bailie RS, Dowden M, et al. Delivery of preventive health services to Indigenous adults: response to a systems-oriented primary care quality improvement intervention. <i>MJA</i> 2007;187(8):453–7.                                                                               |                                  | 1                    |                      |                      | 1                             |                                                                     |                                  |

|                                                                                                                                                                                                                                                                        |  |   |   |  |   |   |   |
|------------------------------------------------------------------------------------------------------------------------------------------------------------------------------------------------------------------------------------------------------------------------|--|---|---|--|---|---|---|
| McDonald EL, Bailie RS, Rumbold AR, et al. Preventing growth faltering among Australian Indigenous children: implications for policy and practice. <i>MJA</i> 2008;188:S84–S6.                                                                                         |  | 1 |   |  |   |   | 1 |
| Bailie RS, Si D, Dowden MC, et al. Delivery of child health services in Indigenous communities: implications for the federal government's emergency intervention in the Northern Territory. <i>MJA</i> . 2008;188(10):615–8.                                           |  | 1 |   |  | 1 |   |   |
| Si D, Bailie R, Cunningham J, et al. Describing and analysing primary health care system support for chronic illness care in Indigenous communities in Australia's Northern Territory – use of the Chronic Care Model. <i>BMC Health Serv Res</i> 2008;8(1):112.       |  | 1 |   |  |   |   | 1 |
| Bailie R, Sibthorpe B, Gardner K, et al. Quality improvement in Indigenous primary health care: history, current initiatives and future directors. <i>Aust J Prim Health</i> 2008;14(2):53–7.                                                                          |  | 1 |   |  |   |   | 1 |
| Bailie R, Si D, Connors C, et al. Study protocol: audit and best practice for chronic disease extension (ABCDE) project. <i>BMC Health Serv Res</i> 2008;8(1):184.                                                                                                     |  | 1 |   |  |   |   | 1 |
| Si D, Bailie R, Weeramanthri T. Effectiveness of chronic care model-oriented interventions to improve quality of diabetes care: a systematic review. <i>Prim Health Care Res Dev</i> 2008;9(1):25–40.                                                                  |  | 1 |   |  |   |   | 1 |
| Bailie RS, Si D, Dowden MC, et al. A systems approach to improving timeliness of immunisation. <i>Vaccine</i> 2009;27(27):3669–74.                                                                                                                                     |  | 1 |   |  | 1 |   |   |
| Baeza J, Bailie R, Lewis JM. Care for chronic conditions for indigenous Australians: key informants' perspectives on policy. <i>Health Policy</i> 2009;92(2–3):211–7.                                                                                                  |  | 1 |   |  |   |   | 1 |
| Si D, Bailie R, Dowden M, et al. Assessing quality of diabetes care and its variation in Aboriginal community health centres in Australia. <i>Diabetes/Metabolism Research and Reviews</i> 2010;26(6):464–73.                                                          |  |   | 1 |  | 1 |   |   |
| McDonald E, Bailie R, Grace J, et al. An ecological approach to health promotion in remote Australian Aboriginal communities. <i>Health Promot Int</i> 2010;25(1):42–53.                                                                                               |  |   | 1 |  |   | 1 |   |
| Rumbold AR, Bailie RS, Si D, et al. Assessing the quality of maternal health care in Indigenous primary care services. <i>MJA</i> 2010;192(10):597.                                                                                                                    |  |   | 1 |  | 1 |   |   |
| Si D, Bailie R, Wang Z, Weeramanthri T. Comparison of diabetes management in five countries for general and indigenous populations: an internet-based review. <i>BMC Health Serv Res</i> 2010;10(1):169.                                                               |  |   | 1 |  |   |   | 1 |
| Gardner KL, Dowden M, Togni S, Bailie R. Understanding uptake of continuous quality improvement in Indigenous primary health care: lessons from a multi-site case study of the Audit and Best Practice for Chronic Disease project. <i>Implement Sci</i> 2010;5(1):21. |  |   | 1 |  |   |   | 1 |

|    |                                                                                                                                                                                                                                                                                                                                   |  |  |   |  |   |   |
|----|-----------------------------------------------------------------------------------------------------------------------------------------------------------------------------------------------------------------------------------------------------------------------------------------------------------------------------------|--|--|---|--|---|---|
| 1  | Bailie R, Si D, Shannon C, Semmens J, et al. Study protocol: national research partnership to improve primary health care performance and outcomes for Indigenous peoples. <i>BMC Health Serv Res</i> 2010;10(1):129.                                                                                                             |  |  | 1 |  |   | 1 |
| 2  |                                                                                                                                                                                                                                                                                                                                   |  |  |   |  |   |   |
| 3  | Gardner K, Bailie R, Si D, et al. Reorienting primary health care for addressing chronic conditions in remote Australia and the South Pacific: review of evidence and lessons from an innovative quality improvement process. <i>Aust J Rural Health</i> 2011;19(3):111–7.                                                        |  |  | 1 |  |   | 1 |
| 4  |                                                                                                                                                                                                                                                                                                                                   |  |  |   |  |   |   |
| 5  | Rumbold AR, Bailie RS, Si D, et al. Delivery of maternal health care in Indigenous primary care services: baseline data for an ongoing quality improvement initiative. <i>BMC Pregnancy Childbirth</i> 2011;11(1):16.                                                                                                             |  |  | 1 |  | 1 |   |
| 6  |                                                                                                                                                                                                                                                                                                                                   |  |  |   |  |   |   |
| 7  | Bailie RS, Si D, Connors CM, et al. Variation in quality of preventive care for well adults in Indigenous community health centres in Australia. <i>BMC Health Serv Res</i> 2011;11(1):139.                                                                                                                                       |  |  | 1 |  | 1 |   |
| 8  |                                                                                                                                                                                                                                                                                                                                   |  |  |   |  |   |   |
| 9  | Si D, Dowden M, Kennedy C, Cox R, et al. Indigenous community care: documented depression in patients with diabetes. <i>Aust Fam Physician</i> 2011;40(5):331.                                                                                                                                                                    |  |  | 1 |  | 1 |   |
| 10 |                                                                                                                                                                                                                                                                                                                                   |  |  |   |  |   |   |
| 11 | Gausia K, Thompson S, Nagel T, et al. Antenatal emotional wellbeing screening in Aboriginal and Torres Strait Islander primary health care services in Australia. <i>Contemp Nurse</i> 2013;46(1):73–82.                                                                                                                          |  |  | 1 |  | 1 |   |
| 12 |                                                                                                                                                                                                                                                                                                                                   |  |  |   |  |   |   |
| 13 | Ralph AP, Fittock M, Schultz R, et al. Improvement in rheumatic fever and rheumatic heart disease management and prevention using a health centre-based continuous quality improvement approach. <i>BMC Health Serv Res</i> 2013;13(1):525.                                                                                       |  |  | 1 |  | 1 |   |
| 14 |                                                                                                                                                                                                                                                                                                                                   |  |  |   |  |   |   |
| 15 | Bailie R, Matthews V, Brands J, et al. A systems-based partnership learning model for strengthening primary healthcare. <i>Implement Sci</i> 2013;8(1):143.                                                                                                                                                                       |  |  | 1 |  |   | 1 |
| 16 |                                                                                                                                                                                                                                                                                                                                   |  |  |   |  |   |   |
| 17 | Schierhout G, Hains J, Si D, et al. Evaluating the effectiveness of a multifaceted, multilevel continuous quality improvement program in primary health care: developing a realist theory of change. <i>Implement Sci</i> 2013;8(1):119.                                                                                          |  |  | 1 |  |   | 1 |
| 18 |                                                                                                                                                                                                                                                                                                                                   |  |  |   |  |   |   |
| 19 | Schierhout G, Nagel T, Si D, et al. Do competing demands of physical illness in type 2 diabetes influence depression screening, documentation and management in primary care: a cross-sectional analytic study in Aboriginal and Torres Strait Islander primary health care settings. <i>Int J Ment Health Syst</i> 2013;7(1):16. |  |  | 1 |  |   | 1 |
| 20 |                                                                                                                                                                                                                                                                                                                                   |  |  |   |  |   |   |
| 21 | McDonald EL, Bailie R, Michel T. Development and trialling of a tool to support a systems approach to improve social determinants of health in rural and remote Australian communities: the healthy community assessment tool. <i>Int J Equity Health</i> 2013;12(1):15.                                                          |  |  | 1 |  | 1 |   |
| 22 |                                                                                                                                                                                                                                                                                                                                   |  |  |   |  |   |   |
| 23 |                                                                                                                                                                                                                                                                                                                                   |  |  |   |  |   |   |
| 24 |                                                                                                                                                                                                                                                                                                                                   |  |  |   |  |   |   |
| 25 |                                                                                                                                                                                                                                                                                                                                   |  |  |   |  |   |   |
| 26 |                                                                                                                                                                                                                                                                                                                                   |  |  |   |  |   |   |
| 27 |                                                                                                                                                                                                                                                                                                                                   |  |  |   |  |   |   |
| 28 |                                                                                                                                                                                                                                                                                                                                   |  |  |   |  |   |   |
| 29 |                                                                                                                                                                                                                                                                                                                                   |  |  |   |  |   |   |
| 30 |                                                                                                                                                                                                                                                                                                                                   |  |  |   |  |   |   |
| 31 |                                                                                                                                                                                                                                                                                                                                   |  |  |   |  |   |   |
| 32 |                                                                                                                                                                                                                                                                                                                                   |  |  |   |  |   |   |
| 33 |                                                                                                                                                                                                                                                                                                                                   |  |  |   |  |   |   |
| 34 |                                                                                                                                                                                                                                                                                                                                   |  |  |   |  |   |   |
| 35 |                                                                                                                                                                                                                                                                                                                                   |  |  |   |  |   |   |
| 36 |                                                                                                                                                                                                                                                                                                                                   |  |  |   |  |   |   |
| 37 |                                                                                                                                                                                                                                                                                                                                   |  |  |   |  |   |   |
| 38 |                                                                                                                                                                                                                                                                                                                                   |  |  |   |  |   |   |
| 39 |                                                                                                                                                                                                                                                                                                                                   |  |  |   |  |   |   |
| 40 |                                                                                                                                                                                                                                                                                                                                   |  |  |   |  |   |   |
| 41 |                                                                                                                                                                                                                                                                                                                                   |  |  |   |  |   |   |
| 42 |                                                                                                                                                                                                                                                                                                                                   |  |  |   |  |   |   |
| 43 |                                                                                                                                                                                                                                                                                                                                   |  |  |   |  |   |   |
| 44 |                                                                                                                                                                                                                                                                                                                                   |  |  |   |  |   |   |
| 45 |                                                                                                                                                                                                                                                                                                                                   |  |  |   |  |   |   |
| 46 |                                                                                                                                                                                                                                                                                                                                   |  |  |   |  |   |   |

|    |                                                                                                                                                                                                                                                                                           |  |  |   |   |   |   |   |
|----|-------------------------------------------------------------------------------------------------------------------------------------------------------------------------------------------------------------------------------------------------------------------------------------------|--|--|---|---|---|---|---|
| 1  | O'Donoghue L, Percival N, Laycock A, et al. Evaluating Aboriginal and Torres Strait Islander health promotion activities using audit and feedback. <i>Aust J Prim Health</i> 2014;20(4):339–44.                                                                                           |  |  | 1 |   |   | 1 |   |
| 2  | Bailie R, Bailie J, Chakraborty A, et al. Consistency of denominator data in electronic health records in Australian primary healthcare services: enhancing data quality. <i>Aust J Prim Health</i> 2015;21(4):450–9.                                                                     |  |  | 1 |   |   |   | 1 |
| 3  | Matthews V, Schierhout G, McBroom J, et al. Duration of participation in continuous quality improvement: a key factor explaining improved delivery of Type 2 diabetes services. <i>BMC Health Serv Res</i> 2014;14(1):578.                                                                |  |  | 1 |   | 1 |   |   |
| 4  | Brimblecombe J, Van Den Boogaard C, Ritchie J, et al. From targets to ripples: tracing the process of developing a community capacity building appraisal tool with remote Australian indigenous communities to tackle food security. <i>BMC Public Health</i> 2014;14(1):914.             |  |  | 1 |   |   | 1 |   |
| 5  | McDonald EL, Bailie RS, Morris PS. Participatory systems approach to health improvement in Australian Aboriginal children. <i>Health Promot Int</i> 2017;32(1):62–72.                                                                                                                     |  |  | 1 |   |   | 1 |   |
| 6  | Gausia K, Thompson SC, Nagel T, et al. Risk of antenatal psychosocial distress in indigenous women and its management at primary health care centres in Australia. <i>General Hospital Psychiatry</i> 2015;37(4):335–9.                                                                   |  |  |   | 1 | 1 |   |   |
| 7  | Puszka S, Nagel T, Matthews V, et al. Monitoring and assessing the quality of care for youth: developing an audit tool using an expert consensus approach. <i>Int J Ment Health Syst</i> 2015;9(1).                                                                                       |  |  |   | 1 | 1 |   |   |
| 8  | Gibson-Helm ME, Teede HJ, Rumbold AR, et al. Continuous quality improvement and metabolic screening during pregnancy at primary health centres attended by Aboriginal and Torres Strait Islander women. <i>MJA</i> 2015;203(9):369–70.                                                    |  |  |   | 1 | 1 |   |   |
| 9  | Tretheway R, Taylor J, O'Hara L, Percival N. A missing ethical competency? A review of critical reflection in health promotion. <i>Health Promot J Austr</i> 2015;26(3):216–21.                                                                                                           |  |  |   | 1 |   | 1 |   |
| 10 | McCalman J, Bainbridge R, Russo S, et al. Psycho-social resilience, vulnerability and suicide prevention: impact evaluation of a mentoring approach to modify suicide risk for remote Indigenous Australian students at boarding school. (Report). <i>BMC Public Health</i> 2016;16(108). |  |  |   | 1 |   | 1 |   |
| 11 | Newham J, Schierhout G, Bailie R, et al. 'There's only one enabler; come up, help us': staff perspectives of barriers and enablers to continuous quality improvement in Aboriginal primary health-care settings in South Australia. <i>Aust J Prim Health</i> 2016;22(3):244–54.          |  |  |   | 1 |   |   | 1 |

1  
2  
3  
4  
5  
6  
7  
8  
9  
10  
11  
12  
13  
14  
15  
16  
17  
18  
19  
20  
21  
22  
23  
24  
25  
26  
27  
28  
29  
30  
31  
32  
33  
34  
35  
36  
37  
38  
39  
40  
41  
42  
43  
44  
45  
46

|                                                                                                                                                                                                                                                                                              |  |  |  |   |   |   |   |
|----------------------------------------------------------------------------------------------------------------------------------------------------------------------------------------------------------------------------------------------------------------------------------------------|--|--|--|---|---|---|---|
| Larkins S, Woods CE, Matthews V, et al. Responses of Aboriginal and Torres Strait Islander primary health-care services to continuous quality improvement initiatives. <i>Front Public Health</i> 2016;3:288.                                                                                |  |  |  | 1 | 1 |   |   |
| Crinall B, Boyle J, Gibson-Helm M, et al. Cardiovascular disease risk in young Indigenous Australians: a snapshot of current preventive health care. <i>Aust N Z J Public Health</i> 2017;41(5):460–6.                                                                                       |  |  |  | 1 | 1 |   |   |
| Bailie C, Matthews V, Bailie J, et al. Determinants and gaps in preventive care delivery for Indigenous Australians: a cross-sectional analysis. <i>Front Public Health</i> 2016;4.                                                                                                          |  |  |  | 1 | 1 |   |   |
| Ralph AP, de Dassel JL, Kirby A, et al. Improving delivery of secondary prophylaxis for rheumatic heart disease in a high-burden setting: outcome of a stepped-wedge, community, randomized trial. <i>J Am Heart Assoc: Cardiovascular and Cerebrovascular Disease</i> 2018;7(14).           |  |  |  | 1 | 1 |   |   |
| Vasant BR, Matthews V, Burgess CP, et al. Wide variation in absolute cardiovascular risk assessment in Aboriginal and Torres Strait Islander people with Type 2 diabetes. <i>Front Public Health</i> 2016;4:37.                                                                              |  |  |  | 1 | 1 |   |   |
| Percival N, O’Donoghue L, Lin V, et al. Improving health promotion using quality improvement techniques in Australian Indigenous primary health care. <i>Front Public Health</i> 2016;4.                                                                                                     |  |  |  | 1 |   | 1 |   |
| Laycock A, Bailie J, Matthews V, et al. Interactive dissemination: engaging stakeholders in the use of aggregated quality improvement data for system-wide change in Australian Indigenous primary health care. <i>Front Public Health</i> 2016;4.                                           |  |  |  | 1 |   |   | 1 |
| Bailie J, Laycock A, Matthews V, et al. System-level action required for wide-scale improvement in quality of primary health care: synthesis of feedback from an interactive process to promote dissemination and use of aggregated quality of care data. <i>Front Public Health</i> 2016;4. |  |  |  | 1 | 1 |   |   |
| Gibson-Helm M, Rumbold A, Teede H, et al. Improving the provision of pregnancy care for Aboriginal and Torres Strait Islander women: a continuous quality improvement initiative. <i>BMC Pregnancy Childbirth</i> 2016;16(118).                                                              |  |  |  | 1 | 1 |   |   |
| Percival NA, McCalman J, Armit C, et al. Implementing health promotion tools in Australian Indigenous primary health care. <i>Health Promot Int</i> 2018;33(1):92–106.                                                                                                                       |  |  |  | 1 |   | 1 |   |
| Hayward MN, Paquette-Warren J, Harris SB. Developing community-driven quality improvement initiatives to enhance chronic disease care in Indigenous communities in Canada: the FORGE AHEAD program protocol. <i>Health Res Policy Syst</i> 2016;14(1):55.                                    |  |  |  | 1 |   |   | 1 |

|    |                                                                                                                                                                                                                                                                                     |  |  |  |   |   |  |   |
|----|-------------------------------------------------------------------------------------------------------------------------------------------------------------------------------------------------------------------------------------------------------------------------------------|--|--|--|---|---|--|---|
| 1  | D'Aprano A, Silburn S, Johnston V, et al. Challenges in monitoring the development of young children in remote Aboriginal health services: clinical audit findings and recommendations for improving practice. <i>Rural Remote Health</i> 2016;16(3):3852.                          |  |  |  | 1 | 1 |  |   |
| 2  | Cunningham FC, Ferguson-Hill S, Matthews V, et al. Leveraging quality improvement through use of the Systems Assessment Tool in Indigenous primary health care services: a mixed methods study. <i>BMC Health Serv Res</i> . 2016;16(1).                                            |  |  |  | 1 |   |  | 1 |
| 3  | Schierhout G, Matthews V, Connors C, et al. Improvement in delivery of type 2 diabetes services differs by mode of care: a retrospective longitudinal analysis in the Aboriginal and Torres Strait Islander primary health care setting. <i>BMC Health Serv Res</i> 2016;16(1):560. |  |  |  | 1 | 1 |  |   |
| 4  | Burnett AM, Morse A, Naduvilath T, et al. Delivery of eye and vision services in Aboriginal and Torres Strait Islander primary healthcare centers. <i>Front Public Health</i> 2016;4.                                                                                               |  |  |  | 1 | 1 |  |   |
| 5  | Searles A, Doran C, Attia J, et al. An approach to measuring and encouraging research translation and research impact. <i>Health Res Policy Syst</i> 2016;14(1).                                                                                                                    |  |  |  | 1 |   |  | 1 |
| 6  | Doran CM, Ling R, Searles A, et al. Does evidence influence policy? Resource allocation and the Indigenous Burden of Disease Study. <i>Aust Health Rev</i> 2016;40(6):705–15.                                                                                                       |  |  |  | 1 |   |  | 1 |
| 7  | McCalman J, Bainbridge R, Percival N, et al. The effectiveness of implementation in Indigenous Australian healthcare: an overview of literature reviews. <i>Int J Equity Health</i> 2016;15:47.                                                                                     |  |  |  | 1 |   |  | 1 |
| 8  | Woods C, Carlisle K, Larkins S, et al. Exploring systems that support good clinical care in Indigenous primary health-care services: a retrospective analysis of longitudinal systems assessment tool data from high-improving services. <i>Front Public Health</i> 2017;5(45).     |  |  |  | 1 |   |  | 1 |
| 9  | Hayward MN, Mequanint S, Paquette-Warren J, et al. The FORGE AHEAD clinical readiness consultation tool: a validated tool to assess clinical readiness for chronic disease care mobilization in Canada's First Nations. <i>BMC Health Serv Res</i> 2017;17(1).                      |  |  |  | 1 |   |  | 1 |
| 10 | Kearns T, Ward F, Puszka S, et al. Anaemia health literacy of community members and health practitioners knowledge of best practice guidelines in a remote Australian Aboriginal community. <i>Univers J Public Health</i> 2017;5(1):32–9.                                          |  |  |  | 1 | 1 |  |   |
| 11 | Nattabi B, Matthews V, Bailie J, et al. Wide variation in sexually transmitted infection testing and counselling at Aboriginal primary health care centres in Australia: analysis of longitudinal continuous quality improvement data. <i>BMC Infect Dis</i> 2017;17(1).            |  |  |  | 1 | 1 |  |   |



1  
2  
3  
4  
5  
6  
7  
8  
9  
10  
11  
12  
13  
14  
15  
16  
17  
18  
19  
20  
21  
22  
23  
24  
25  
26  
27  
28  
29  
30  
31  
32  
33  
34  
35  
36  
37  
38  
39  
40  
41  
42  
43  
44  
45  
46

|                                                                                                                                                                                                                                                                                       |  |  |  |   |   |   |   |
|---------------------------------------------------------------------------------------------------------------------------------------------------------------------------------------------------------------------------------------------------------------------------------------|--|--|--|---|---|---|---|
| Meiklejohn JA, Garvey G, Bailie R, et al. Follow-up cancer care: perspectives of Aboriginal and Torres Strait Islander cancer survivors. <i>Support Care Cancer</i> 2017;25(5):1597.                                                                                                  |  |  |  | 1 | 1 |   |   |
| Laycock A, Bailie J, Matthews V, et al. A developmental evaluation to enhance stakeholder engagement in a wide-scale interactive project disseminating quality improvement data: study protocol for a mixed-methods study. <i>BMJ Open</i> 2017;7(7).                                 |  |  |  | 1 |   |   | 1 |
| Bailie J, Matthews V, Laycock A, et al. Improving preventive health care in Aboriginal and Torres Strait Islander primary care settings. <i>Globalization and Health</i> 2017;13(1):48.                                                                                               |  |  |  | 1 | 1 |   |   |
| Brimblecombe J, Bailie R, van Den Boogaard C, et al. Feasibility of a novel participatory multi-sector continuous improvement approach to enhance food security in remote Indigenous Australian communities. <i>SSM – Popul Health</i> 2017;3(C):566–76.                              |  |  |  | 1 |   | 1 |   |
| Langham E, McCalman J, Matthews V, et al. Social and emotional wellbeing screening for Aboriginal and Torres Strait Islanders within primary health care: a series of missed opportunities? <i>Front Public Health</i> 2017;5:159.                                                    |  |  |  | 1 | 1 |   |   |
| de Witt A, Cunningham FC, Bailie R, Bernardes CM, Matthews V, Arley B, et al. Identification of Australian Aboriginal and Torres Strait Islander cancer patients in the primary health care setting. <i>Front Public Health</i> 2017;5:199.                                           |  |  |  | 1 | 1 |   |   |
| Matthews V, Burgess CP, Connors C, et al. Integrated clinical decision support systems promote absolute cardiovascular risk assessment: an important primary prevention measure in Aboriginal and Torres Strait Islander primary health care. <i>Front Public Health</i> 2017;5(233). |  |  |  | 1 | 1 |   |   |
| Bailie R, Matthews V, Larkins S, et al. Impact of policy support on uptake of evidence-based continuous quality improvement activities and the quality of care for Indigenous Australians: a comparative case study. <i>BMJ Open</i> 2017;7(10).                                      |  |  |  | 1 |   |   | 1 |
| Zuchowski I, Miles D, Woods C, Tsey K. Continuous quality improvement processes in child protection: a systematic literature review. <i>Res Soc Work Pract</i> 2017;1049731517743337.                                                                                                 |  |  |  | 1 |   | 1 |   |
| Ramanathan S, Reeves P, Deeming S, et al. Encouraging translation and assessing impact of the Centre for Research Excellence in Integrated Quality Improvement: rationale and protocol for a research impact assessment. <i>BMJ Open</i> 2017;7(12).                                  |  |  |  | 1 |   |   | 1 |
| Bailie R, Bailie J, Larkins S, Broughton E. Editorial: Continuous quality improvement (CQI) – advancing understanding of design, application, impact, and evaluation of CQI approaches. <i>Front Public Health</i> 2017;5(306).                                                       |  |  |  | 1 |   |   | 1 |
| Bailie R, Larkins S, Broughton E. Continuous Quality Improvement – Advancing Understanding of Design, Application, Impact and Evaluation of CQI Approaches. Lausanne, Switzerland: Frontiers Media SA 2017.                                                                           |  |  |  | 1 | 1 |   |   |

|    |                                                                                                                                                                                                                                                      |  |  |  |   |   |   |   |
|----|------------------------------------------------------------------------------------------------------------------------------------------------------------------------------------------------------------------------------------------------------|--|--|--|---|---|---|---|
| 1  | McAullay D, McAuley K, Bailie R, et al. Sustained participation in annual continuous quality improvement activities improves quality of care for Aboriginal and Torres Strait Islander children. <i>J Paediatr Child Health</i> 2018;54(2):132–40.   |  |  |  | 1 | 1 |   |   |
| 2  | Edmond KM, McAuley K, McAullay D, et al. Quality of social and emotional wellbeing services for families of young Indigenous children attending primary care centers; a cross sectional analysis. <i>BMC Health Serv Res</i> 2018;18(1).             |  |  |  | 1 | 1 |   |   |
| 3  | Gibson-Helm ME, Bailie J, Matthews V, et al. Identifying evidence-practice gaps and strategies for improvement in Aboriginal and Torres Strait Islander maternal health care. <i>PLoS ONE</i> 2018;13(2):e0192262.                                   |  |  |  | 1 | 1 |   |   |
| 4  | Bailie J, Matthews V, Laycock A, et al. Rigorous follow-up systems for abnormal results are essential to improve health outcomes for Aboriginal and Torres Strait Islander people. <i>Aust J Prim Health</i> 2018;24:1–3.                            |  |  |  | 1 |   |   | 1 |
| 5  | McCalman J, Bailie R, Bainbridge R, et al. Continuous quality improvement and comprehensive primary health care: a systems framework to improve service quality and health outcomes. <i>Front Public Health</i> 2018;6.                              |  |  |  | 1 |   |   | 1 |
| 6  | McPhail-Bell K, Matthews V, Bainbridge R, et al. An ‘All Teach, All Learn’ approach to research capacity strengthening in Indigenous primary health care continuous quality improvement. <i>Front Public Health</i> 2018;6.                          |  |  |  | 1 |   | 1 |   |
| 7  | McCalman J, Bainbridge R, Brown C, et al. The Aboriginal Australian Family Wellbeing Program: a historical analysis of the conditions that enabled its spread. <i>Front Public Health</i> 2018;6.                                                    |  |  |  | 1 |   |   | 1 |
| 8  | Bailie J, Cunningham FC, Bainbridge RG, et al. Comparing and contrasting ‘innovation platforms’ with other forms of professional networks for strengthening primary healthcare systems for Indigenous Australians. <i>BMJ Glob Health</i> 2018;3(3). |  |  |  | 1 | 1 |   |   |
| 9  | Meiklejohn JA, Arley B, Bailie R, et al. Community-identified recommendations to enhance cancer survivorship for Aboriginal and Torres Strait Islander people. <i>Aust J Prim Health</i> 2018;24(3):233–40.                                          |  |  |  | 1 | 1 |   |   |
| 10 | Bailie J, Boyle JA, Bailie RS. Population attributable fractions of perinatal outcomes for nulliparous women associated with overweight and obesity, 1990–2014. <i>Med J Aust</i> 2018;208(11):505–6.                                                |  |  |  | 1 |   |   | 1 |
| 11 | Cunningham FC, Matthews V, Sheahan A, et al. Assessing collaboration in a National Research Partnership in Quality Improvement in Indigenous Primary Health Care: a network approach. <i>Front Public Health</i> . 2018;6(182).                      |  |  |  | 1 |   | 1 |   |
| 12 | Onnis L-A, Klieve H, Tsey K. The evidence needed to demonstrate impact: A synthesis of the evidence from a phased social and emotional wellbeing intervention. <i>Eval Program Plann</i> 2018;70:35–43.                                              |  |  |  | 1 | 1 |   |   |

1  
2  
3  
4  
5  
6  
7  
8  
9  
10  
11  
12  
13  
14  
15  
16  
17  
18  
19  
20  
21  
22  
23  
24  
25  
26  
27  
28  
29  
30  
31  
32  
33  
34  
35  
36  
37  
38  
39  
40  
41  
42  
43  
44  
45  
46

|                                                                                                                                                                                                                                                                                    |  |  |  |   |   |   |   |
|------------------------------------------------------------------------------------------------------------------------------------------------------------------------------------------------------------------------------------------------------------------------------------|--|--|--|---|---|---|---|
| Ralph AP, de Dassel JL, Kirby A, et al. Improving delivery of secondary prophylaxis for Rheumatic Heart Disease in a high-burden setting: outcome of a stepped-wedge, community, randomized trial. <i>J Am Heart Assoc: Cardiovascular and Cerebrovascular Disease</i> 2018;7(14). |  |  |  | 1 |   | 1 |   |
| Heyeres M, Kinchin I, Whatley E, et al. Evaluation of a residential mental health recovery service in North Queensland. <i>Front Public Health</i> 2018;6:123.                                                                                                                     |  |  |  | 1 | 1 |   |   |
| Read C, Mitchell AG, de Dassel JL, et al. Qualitative evaluation of a complex intervention to improve Rheumatic Heart Disease secondary prophylaxis. <i>J Am Heart Assoc.</i> 2018;7(14).                                                                                          |  |  |  | 1 | 1 |   |   |
| Nattabi B, Girgis S, Matthews V, et al. Clinic predictors of better syphilis testing in Aboriginal primary healthcare: a promising opportunity for primary healthcare service managers. <i>Aust J Prim Health</i> 2018;24(4):350–8.                                                |  |  |  | 1 | 1 |   |   |
| Edmond KM, Tung S, McAuley K, et al. Improving developmental care in primary practice for disadvantaged children. <i>Arch Dis Childhood</i> 2019;104(4):372–80.                                                                                                                    |  |  |  | 1 | 1 |   |   |
| Strobel NA, McAuley K, Matthews V, et al. Understanding the structure and processes of primary health care for young indigenous children. <i>J Prim Health Care</i> 2018;10(3):267–78.                                                                                             |  |  |  | 1 |   | 1 |   |
| Onnis L-A, Hakendorf M, Tsey K. How are Continuous Quality Improvement (CQI) approaches used in evaluating management development programs? a literature review. <i>Asia Pacific Journal of Health Management</i> 2018;13(2):1–15.                                                 |  |  |  | 1 |   |   | 1 |
| Smith G, Kirkham R, Gunabarra C, et al. ‘We can work together, talk together’: an Aboriginal health care home. <i>Aust Health Rev</i> 2018;43:486–91.                                                                                                                              |  |  |  | 1 |   | 1 |   |
| Tsey K, Lui SM, Heyeres M, et al. Developing soft skills: exploring the feasibility of an Australian well-being program for health managers and leaders in Timor-Leste. <i>SAGE Open</i> 2018;8(4).                                                                                |  |  |  | 1 |   |   | 1 |
| Laycock A, Harvey G, Percival N, et al. Application of the i-PARIHS framework for enhancing understanding of interactive dissemination to achieve wide-scale improvement in Indigenous primary healthcare. <i>Health Res Policy Syst</i> 2018;16(1).                               |  |  |  | 1 | 1 |   |   |
| de Witt A, Cunningham FC, Bailie R, et al. ‘It’s just presence’, the contributions of Aboriginal and Torres Strait Islander health professionals in cancer care in Queensland. <i>Front Public Health</i> 2018;6:344.                                                              |  |  |  | 1 |   | 1 |   |
| Zuchowski I, Miles D, Gair S, et al. K. Social work research with industry: a systematic literature review of engagement and impact. <i>Br J Soc Work</i> 2019;49(8):2299–324.                                                                                                     |  |  |  | 1 |   |   | 1 |
| Heyeres M, Tsey K, Yang Y, et al. The characteristics and reporting quality of research impact case studies: a systematic review. <i>Eval Program Plann</i> 2019;73:10–23.                                                                                                         |  |  |  | 1 |   |   | 1 |

|                                                                                                                                                                                                                                                                                      |  |  |  |   |   |   |   |
|--------------------------------------------------------------------------------------------------------------------------------------------------------------------------------------------------------------------------------------------------------------------------------------|--|--|--|---|---|---|---|
| Laycock AF, Bailie J, Percival NA, et al. Wide-scale continuous quality improvement: a study of stakeholders' use of quality of care reports at various system levels, and factors mediating use. <i>Front Public Health</i> 2019;6.                                                 |  |  |  | 1 | 1 |   |   |
| Bailie J, Laycock A, Matthews V, et al. Emerging evidence of the value of health assessments for Aboriginal and Torres Strait Islander people in the primary healthcare setting. <i>Aust J Prim Health</i> 2019;25(1):1–5.                                                           |  |  |  | 1 |   |   | 1 |
| Tsey K, Onnis L-A, Whiteside M, et al. Assessing research impact: Australian Research Council criteria and the case of Family Wellbeing research. <i>Eval Program Plann</i> 2019;73:176–86.                                                                                          |  |  |  | 1 | 1 |   |   |
| Lestari T, Graham S, Van den Boogard C, et al. Bridging the knowledge-practice gap in tuberculosis contact management in a high-burden setting: a mixed-methods protocol for a multicenter health system strengthening study. <i>Implement Sci</i> 2019;14(1):31.                    |  |  |  | 1 |   | 1 |   |
| Onnis L-A, Hakendorf M, Diamond M, et al. CQI approaches for evaluating management development programs: a case study with health service managers from geographically remote settings. <i>Eval Program Plann</i> 2019;74:91–101.                                                    |  |  |  | 1 |   |   | 1 |
| Turner NN, Taylor J, Larkins S, et al. Conceptualizing the association between community participation and CQI in Aboriginal and Torres Strait Islander PHC services. <i>Qual Health Res</i> 2019;29(13):1904–15.                                                                    |  |  |  | 1 | 1 |   |   |
| Gunaratnam P, Schierhout G, Brands J, et al. Qualitative perspectives on the sustainability of sexual health continuous quality improvement in clinics serving remote Aboriginal communities in Australia. <i>BMJ Open</i> 2019;9(5):e026679.                                        |  |  |  | 1 | 1 |   |   |
| Valery PC, Bernardes CM, De Witt A, et al. Patterns of primary health care service use of Indigenous Australians diagnosed with cancer. <i>Support Care Cancer</i> 2020;28(1):317–27.                                                                                                |  |  |  | 1 | 1 |   |   |
| Mitchinson C, Strobel N, McAullay D, et al. Anemia in disadvantaged children aged under five years: quality of care in primary practice. <i>BMC Pediatr</i> 2019;19(1):178.                                                                                                          |  |  |  | 1 |   |   | 1 |
| Larkins S, Carlisle K, Turner N, et al. 'At the grass roots level it's about sitting down and talking': exploring quality improvement through case studies with high-improving Aboriginal and Torres Strait Islander primary healthcare services. <i>BMJ Open</i> 2019;9(5):e027568. |  |  |  | 1 |   | 1 |   |
| Conte KP, Gwynn J, Turner N, Koller C, Gillham KE. Making space for Aboriginal and Torres Strait Islander community health workers in health promotion. <i>Health Promot Int</i> 2019.                                                                                               |  |  |  | 1 | 1 |   |   |
| Carroll SJ, Dale MJ, Bailie R, et al. Climatic and community sociodemographic factors associated with remote Indigenous Australian smoking rates: an ecological study of health audit data. <i>BMJ Open</i> 2019;9(7).                                                               |  |  |  | 1 |   |   | 1 |

1  
2  
3  
4  
5  
6  
7  
8  
9  
10  
11  
12  
13  
14  
15  
16  
17  
18  
19  
20  
21  
22  
23  
24  
25  
26  
27  
28  
29  
30  
31  
32  
33  
34  
35  
36  
37  
38  
39  
40  
41  
42  
43  
44  
45  
46

|                                                                                                                                                                                                                                                                                                       |  |  |  |   |   |   |   |
|-------------------------------------------------------------------------------------------------------------------------------------------------------------------------------------------------------------------------------------------------------------------------------------------------------|--|--|--|---|---|---|---|
| Preston R, Rannard S, Felton-Busch C, et al. How and why do participatory women’s groups (PWGs) improve the quality of maternal and child health (MCH) care? A systematic review protocol. <i>BMJ Open</i> 2019;9(9):e030461.                                                                         |  |  |  | 1 |   |   | 1 |
| Laycock A, Bailie J, Matthews V, et al. Using developmental evaluation to support knowledge translation: reflections from a large-scale quality improvement project in Indigenous primary healthcare. <i>Health Res Policy Syst</i> 2019;17(1):70.                                                    |  |  |  | 1 | 1 |   |   |
| Diaz A, Vo B, Baade PD, Matthews V, et al. Service level factors associated with cervical screening in Aboriginal and Torres Strait Islander primary health care centres in Australia. <i>Int J Environ Res Public Health</i> 2019;16(19):3630.                                                       |  |  |  | 1 | 1 |   |   |
| Kinchin I, Russell AM, Tsey K, et al. Psychiatric inpatient cost of care before and after admission at a residential subacute step-up/step-down mental health facility. <i>J Med Econ</i> 2019;22(5):491–8.                                                                                           |  |  |  | 1 |   | 1 |   |
| Lopez-Carmen V, McCalman J, Benveniste T, Askew D, Spurling G, Langham E, et al. Working together to improve the mental health of indigenous children: a systematic review. <i>Child Youth Serv Rev</i> 2019;104:104408.                                                                              |  |  |  | 1 |   |   | 1 |
| Tsey K. Working on Wicked Problems: A Strengths-based Approach to Research Engagement and Impact. Basel, Switzerland: Springer Nature 2019.                                                                                                                                                           |  |  |  | 1 |   |   | 1 |
| Cunningham FC, Ranmuthugala G, Westbrook JI, et al. Tackling the wicked problem of health networks: the design of an evaluation framework. <i>BMJ Open</i> 2019;9(5):e024231.                                                                                                                         |  |  |  | 1 |   | 1 |   |
| Onnis L-A, Moylan R, Whiteside M, et al. Integrating the Family Wellbeing Program into practice: a conceptual model. <i>Australian Social Work</i> 2019:1–14.                                                                                                                                         |  |  |  | 1 | 1 |   |   |
| Carrington A, Dewar S, Kinchin I, et al. A police-led community response to child abuse and youth sexual violence and abuse in Indigenous communities in Far North Queensland: ‘Speak up. Be strong. Be heard’. <i>Child Abuse Negl</i> 2019;98:104228.                                               |  |  |  | 1 |   |   | 1 |
| Fazelipour M, Cunningham F. Barriers and facilitators to the implementation of brief interventions targeting smoking, nutrition, and physical activity for indigenous populations: a narrative review. <i>Int J Equity Health</i> 2019;18(1):169.                                                     |  |  |  | 1 | 1 |   |   |
| Katzenellenbogen J, Bond-Smith D, Ralph A, et al. Priorities for improvement in management of Acute Rheumatic Fever and Rheumatic Heart Disease: analysis of cross-sectional continuous quality improvement data in Aboriginal primary health care centres in Australia. <i>Aust Health Rev</i> 2019. |  |  |  | 1 | 1 |   |   |
| Quinn E, Girgis S, Van Buskirk J, Matthews V, Ward JE. Clinic factors associated with better delivery of secondary prophylaxis in acute rheumatic fever management. <i>Aust J Gen Pract</i> 2019;48(12):859.                                                                                          |  |  |  | 1 | 1 |   |   |

1  
2  
3  
4  
5  
6  
7  
8  
9  
10  
11  
12  
13  
14  
15  
16  
17  
18  
19  
20  
21  
22  
23  
24  
25  
26  
27  
28  
29  
30  
31  
32  
33  
34  
35  
36  
37  
38  
39  
40  
41  
42  
43  
44  
45  
46

|                                                                                                                                                                                                                 |  |  |  |   |   |  |  |
|-----------------------------------------------------------------------------------------------------------------------------------------------------------------------------------------------------------------|--|--|--|---|---|--|--|
| Adily A, Girgis S, D'Este C, Matthews V, Ward JE. Syphilis testing performance in Aboriginal primary health care: exploring impact of continuous quality improvement over time. <i>Aust J Prim Health</i> 2020. |  |  |  | 1 | 1 |  |  |
|-----------------------------------------------------------------------------------------------------------------------------------------------------------------------------------------------------------------|--|--|--|---|---|--|--|

For peer review only

**The RECORD statement – checklist of items, extended from the STROBE statement, that should be reported in observational studies using routinely collected health data.**

|                           | Item No. | STROBE items                                                                                                                                                                               | Location in manuscript where items are reported                             | RECORD items                                                                                                                                                                                                                                                                                                                                                                                                                                       | Location in manuscript where items are reported                                             |
|---------------------------|----------|--------------------------------------------------------------------------------------------------------------------------------------------------------------------------------------------|-----------------------------------------------------------------------------|----------------------------------------------------------------------------------------------------------------------------------------------------------------------------------------------------------------------------------------------------------------------------------------------------------------------------------------------------------------------------------------------------------------------------------------------------|---------------------------------------------------------------------------------------------|
| <b>Title and abstract</b> |          |                                                                                                                                                                                            |                                                                             |                                                                                                                                                                                                                                                                                                                                                                                                                                                    |                                                                                             |
|                           | 1        | (a) Indicate the study's design with a commonly used term in the title or the abstract (b) Provide in the abstract an informative and balanced summary of what was done and what was found | Title and abstract                                                          | <p>RECORD 1.1: The type of data used should be specified in the title or abstract. When possible, the name of the databases used should be included.</p> <p>RECORD 1.2: If applicable, the geographic region and timeframe within which the study took place should be reported in the title or abstract.</p> <p>RECORD 1.3: If linkage between databases was conducted for the study, this should be clearly stated in the title or abstract.</p> | <p>Title and abstract</p> <p>Abstract, though some information in title also.</p> <p>NA</p> |
| <b>Introduction</b>       |          |                                                                                                                                                                                            |                                                                             |                                                                                                                                                                                                                                                                                                                                                                                                                                                    |                                                                                             |
| Background rationale      | 2        | Explain the scientific background and rationale for the investigation being reported                                                                                                       | Introduction paragraphs 1 -3                                                |                                                                                                                                                                                                                                                                                                                                                                                                                                                    |                                                                                             |
| Objectives                | 3        | State specific objectives, including any prespecified hypotheses                                                                                                                           | Introduction paragraph 3                                                    |                                                                                                                                                                                                                                                                                                                                                                                                                                                    |                                                                                             |
| <b>Study Design</b>       |          |                                                                                                                                                                                            |                                                                             |                                                                                                                                                                                                                                                                                                                                                                                                                                                    |                                                                                             |
| Study Design              | 4        | Present key elements of study design early in the paper                                                                                                                                    | Title, Abstract, Introduction and Methods                                   |                                                                                                                                                                                                                                                                                                                                                                                                                                                    |                                                                                             |
| Setting                   | 5        | Describe the setting, locations, and relevant dates, including periods of recruitment, exposure, follow-up, and data collection                                                            | Setting described, specifically see Table 1; along with time periods (2002- |                                                                                                                                                                                                                                                                                                                                                                                                                                                    |                                                                                             |



|              |   |                                                                                                                                                                                                                                                                                                                                                                                                                                                                                                                                                                                                                                                                                                                              |                                                                                                                                                               |                                                                                                                                                                                                                                                                                                                                                                                                                                                                                                                                                                                                                                                                                                      |                                                                                                                                                                                          |
|--------------|---|------------------------------------------------------------------------------------------------------------------------------------------------------------------------------------------------------------------------------------------------------------------------------------------------------------------------------------------------------------------------------------------------------------------------------------------------------------------------------------------------------------------------------------------------------------------------------------------------------------------------------------------------------------------------------------------------------------------------------|---------------------------------------------------------------------------------------------------------------------------------------------------------------|------------------------------------------------------------------------------------------------------------------------------------------------------------------------------------------------------------------------------------------------------------------------------------------------------------------------------------------------------------------------------------------------------------------------------------------------------------------------------------------------------------------------------------------------------------------------------------------------------------------------------------------------------------------------------------------------------|------------------------------------------------------------------------------------------------------------------------------------------------------------------------------------------|
|              |   |                                                                                                                                                                                                                                                                                                                                                                                                                                                                                                                                                                                                                                                                                                                              | 2004; 2005-2009; 2010-2014; 2015-2019)                                                                                                                        |                                                                                                                                                                                                                                                                                                                                                                                                                                                                                                                                                                                                                                                                                                      |                                                                                                                                                                                          |
| Participants | 6 | <p>(a) <i>Cohort study</i> - Give the eligibility criteria, and the sources and methods of selection of participants. Describe methods of follow-up</p> <p><i>Case-control study</i> - Give the eligibility criteria, and the sources and methods of case ascertainment and control selection. Give the rationale for the choice of cases and controls</p> <p><i>Cross-sectional study</i> - Give the eligibility criteria, and the sources and methods of selection of participants</p> <p>(b) <i>Cohort study</i> - For matched studies, give matching criteria and number of exposed and unexposed</p> <p><i>Case-control study</i> - For matched studies, give matching criteria and the number of controls per case</p> | Persons and the organisations they were affiliated with were included if they co-authored a relevant publication in the study period as described in methods. | <p>RECORD 6.1: The methods of study population selection (such as codes or algorithms used to identify subjects) should be listed in detail. If this is not possible, an explanation should be provided.</p> <p>RECORD 6.2: Any validation studies of the codes or algorithms used to select the population should be referenced. If validation was conducted for this study and not published elsewhere, detailed methods and results should be provided.</p> <p>RECORD 6.3: If the study involved linkage of databases, consider use of a flow diagram or other graphical display to demonstrate the data linkage process, including the number of individuals with linked data at each stage.</p> | <p>Persons and the organisations they were affiliated with were included if they co-authored a relevant publication in the study period as described in methods.</p> <p>NA</p> <p>NA</p> |
| Variables    | 7 | Clearly define all outcomes, exposures, predictors, potential confounders, and effect modifiers. Give diagnostic criteria, if applicable.                                                                                                                                                                                                                                                                                                                                                                                                                                                                                                                                                                                    | Definitions of categories provided in manuscript. In Methods section under heading 'Data categorisation, standardisation and cleaning'                        | RECORD 7.1: A complete list of codes and algorithms used to classify exposures, outcomes, confounders, and effect modifiers should be provided. If these cannot be reported, an explanation should be provided.                                                                                                                                                                                                                                                                                                                                                                                                                                                                                      | Definitions of categories provided in manuscript. In Methods section under heading 'Data categorisation, standardisation and cleaning'                                                   |

|                                                                                            |                              |    |                                                                                                                                                                                      |                                                                                                                                                                                     |                                                                                                                                                                                     |
|--------------------------------------------------------------------------------------------|------------------------------|----|--------------------------------------------------------------------------------------------------------------------------------------------------------------------------------------|-------------------------------------------------------------------------------------------------------------------------------------------------------------------------------------|-------------------------------------------------------------------------------------------------------------------------------------------------------------------------------------|
| 1<br>2<br>3<br>4<br>5<br>6<br>7                                                            | Data sources/<br>measurement | 8  | For each variable of interest, give sources of data and details of methods of assessment (measurement). Describe comparability of assessment methods if there is more than one group | Detailed in results - Table 3                                                                                                                                                       | Detailed in results – Table 3.                                                                                                                                                      |
| 8<br>9<br>10<br>11<br>12<br>13<br>14<br>15<br>16<br>17<br>18<br>19<br>20<br>21<br>22<br>23 | Bias                         | 9  | Describe any efforts to address potential sources of bias                                                                                                                            | Detailed in methods, eg. Having two authors undertaking categorisation in a blind manner, then conferring for any discrepancies; group analysis processes by reviews of co-authors. | Detailed in methods, eg. Having two authors undertaking categorisation in a blind manner, then conferring for any discrepancies; group analysis processes by reviews of co-authors. |
| 24<br>25<br>26<br>27<br>28<br>29                                                           | Study size                   | 10 | Explain how the study size was arrived at                                                                                                                                            | Detailed in methods – eg Publications within the period under study.                                                                                                                | Detailed in methods eg. Publications within the period under study.                                                                                                                 |
| 30<br>31<br>32<br>33<br>34<br>35                                                           | Quantitative variables       | 11 | Explain how quantitative variables were handled in the analyses. If applicable, describe which groupings were chosen, and why                                                        | NA                                                                                                                                                                                  |                                                                                                                                                                                     |
| 36<br>37<br>38<br>39<br>40<br>41<br>42                                                     | Statistical methods          | 12 | (a) Describe all statistical methods, including those used to control for confounding<br>(b) Describe any methods used to examine subgroups and interactions                         | NA                                                                                                                                                                                  |                                                                                                                                                                                     |

|    |                                  |                                                                                                               |                                                                                                                                                                          |                                                                                                                                                                                                                                                              |                                                                                                             |
|----|----------------------------------|---------------------------------------------------------------------------------------------------------------|--------------------------------------------------------------------------------------------------------------------------------------------------------------------------|--------------------------------------------------------------------------------------------------------------------------------------------------------------------------------------------------------------------------------------------------------------|-------------------------------------------------------------------------------------------------------------|
| 1  |                                  | (c) Explain how missing data were addressed                                                                   |                                                                                                                                                                          |                                                                                                                                                                                                                                                              |                                                                                                             |
| 2  |                                  | (d) <i>Cohort study</i> - If applicable, explain how loss to follow-up was addressed                          |                                                                                                                                                                          |                                                                                                                                                                                                                                                              |                                                                                                             |
| 3  |                                  | <i>Case-control study</i> - If applicable, explain how matching of cases and controls was addressed           |                                                                                                                                                                          |                                                                                                                                                                                                                                                              |                                                                                                             |
| 4  |                                  | <i>Cross-sectional study</i> - If applicable, describe analytical methods taking account of sampling strategy |                                                                                                                                                                          |                                                                                                                                                                                                                                                              |                                                                                                             |
| 5  |                                  | (e) Describe any sensitivity analyses                                                                         |                                                                                                                                                                          |                                                                                                                                                                                                                                                              |                                                                                                             |
| 6  |                                  |                                                                                                               |                                                                                                                                                                          |                                                                                                                                                                                                                                                              |                                                                                                             |
| 7  |                                  |                                                                                                               |                                                                                                                                                                          |                                                                                                                                                                                                                                                              |                                                                                                             |
| 8  |                                  |                                                                                                               |                                                                                                                                                                          |                                                                                                                                                                                                                                                              |                                                                                                             |
| 9  |                                  |                                                                                                               |                                                                                                                                                                          |                                                                                                                                                                                                                                                              |                                                                                                             |
| 10 |                                  |                                                                                                               |                                                                                                                                                                          |                                                                                                                                                                                                                                                              |                                                                                                             |
| 11 |                                  |                                                                                                               |                                                                                                                                                                          |                                                                                                                                                                                                                                                              |                                                                                                             |
| 12 |                                  |                                                                                                               |                                                                                                                                                                          |                                                                                                                                                                                                                                                              |                                                                                                             |
| 13 |                                  |                                                                                                               |                                                                                                                                                                          |                                                                                                                                                                                                                                                              |                                                                                                             |
| 14 |                                  |                                                                                                               |                                                                                                                                                                          |                                                                                                                                                                                                                                                              |                                                                                                             |
| 15 |                                  |                                                                                                               |                                                                                                                                                                          |                                                                                                                                                                                                                                                              |                                                                                                             |
| 16 |                                  |                                                                                                               |                                                                                                                                                                          |                                                                                                                                                                                                                                                              |                                                                                                             |
| 17 |                                  |                                                                                                               |                                                                                                                                                                          |                                                                                                                                                                                                                                                              |                                                                                                             |
| 18 | Data access and cleaning methods | ..                                                                                                            |                                                                                                                                                                          | RECORD 12.1: Authors should describe the extent to which the investigators had access to the database population used to create the study population.<br><br>RECORD 12.2: Authors should provide information on the data cleaning methods used in the study. | Noted in Methods eg. Internal project records used. Publications retrieved from publicly available sources. |
| 19 |                                  |                                                                                                               |                                                                                                                                                                          |                                                                                                                                                                                                                                                              |                                                                                                             |
| 20 |                                  |                                                                                                               |                                                                                                                                                                          |                                                                                                                                                                                                                                                              |                                                                                                             |
| 21 |                                  |                                                                                                               |                                                                                                                                                                          |                                                                                                                                                                                                                                                              |                                                                                                             |
| 22 |                                  |                                                                                                               |                                                                                                                                                                          |                                                                                                                                                                                                                                                              |                                                                                                             |
| 23 |                                  |                                                                                                               |                                                                                                                                                                          |                                                                                                                                                                                                                                                              |                                                                                                             |
| 24 |                                  |                                                                                                               |                                                                                                                                                                          |                                                                                                                                                                                                                                                              |                                                                                                             |
| 25 |                                  |                                                                                                               |                                                                                                                                                                          |                                                                                                                                                                                                                                                              |                                                                                                             |
| 26 |                                  |                                                                                                               |                                                                                                                                                                          |                                                                                                                                                                                                                                                              |                                                                                                             |
| 27 |                                  |                                                                                                               |                                                                                                                                                                          |                                                                                                                                                                                                                                                              |                                                                                                             |
| 28 | Linkage                          | ..                                                                                                            |                                                                                                                                                                          | RECORD 12.3: State whether the study included person-level, institutional-level, or other data linkage across two or more databases. The methods of linkage and methods of linkage quality evaluation should be provided.                                    | NA                                                                                                          |
| 29 |                                  |                                                                                                               |                                                                                                                                                                          |                                                                                                                                                                                                                                                              |                                                                                                             |
| 30 |                                  |                                                                                                               |                                                                                                                                                                          |                                                                                                                                                                                                                                                              |                                                                                                             |
| 31 |                                  |                                                                                                               |                                                                                                                                                                          |                                                                                                                                                                                                                                                              |                                                                                                             |
| 32 |                                  |                                                                                                               |                                                                                                                                                                          |                                                                                                                                                                                                                                                              |                                                                                                             |
| 33 |                                  |                                                                                                               |                                                                                                                                                                          |                                                                                                                                                                                                                                                              |                                                                                                             |
| 34 |                                  |                                                                                                               |                                                                                                                                                                          |                                                                                                                                                                                                                                                              |                                                                                                             |
| 35 |                                  |                                                                                                               |                                                                                                                                                                          |                                                                                                                                                                                                                                                              |                                                                                                             |
| 36 | <b>Results</b>                   |                                                                                                               |                                                                                                                                                                          |                                                                                                                                                                                                                                                              |                                                                                                             |
| 37 | Participants                     | 13                                                                                                            | (a) Report the numbers of individuals at each stage of the study ( <i>e.g.</i> , numbers potentially eligible, examined for eligibility, confirmed eligible, included in | RECORD 13.1: Describe in detail the selection of the persons included in the study ( <i>i.e.</i> , study population selection) including filtering based on data quality, data availability and linkage. The selection of included persons can               | Noted in methods – eg. Persons and the organisations they were affiliated with were included if             |
| 38 |                                  |                                                                                                               |                                                                                                                                                                          |                                                                                                                                                                                                                                                              |                                                                                                             |
| 39 |                                  |                                                                                                               |                                                                                                                                                                          |                                                                                                                                                                                                                                                              |                                                                                                             |
| 40 |                                  |                                                                                                               |                                                                                                                                                                          |                                                                                                                                                                                                                                                              |                                                                                                             |
| 41 |                                  |                                                                                                               |                                                                                                                                                                          |                                                                                                                                                                                                                                                              |                                                                                                             |
| 42 |                                  |                                                                                                               |                                                                                                                                                                          |                                                                                                                                                                                                                                                              |                                                                                                             |
| 43 |                                  |                                                                                                               |                                                                                                                                                                          |                                                                                                                                                                                                                                                              |                                                                                                             |
| 44 |                                  |                                                                                                               |                                                                                                                                                                          |                                                                                                                                                                                                                                                              |                                                                                                             |
| 45 |                                  |                                                                                                               |                                                                                                                                                                          |                                                                                                                                                                                                                                                              |                                                                                                             |
| 46 |                                  |                                                                                                               |                                                                                                                                                                          |                                                                                                                                                                                                                                                              |                                                                                                             |
| 47 |                                  |                                                                                                               |                                                                                                                                                                          |                                                                                                                                                                                                                                                              |                                                                                                             |

|                         |           |                                                                                                                                                                                                                                                                                                                                                                                        |                                                                                                        |                                                                            |                                                                                             |
|-------------------------|-----------|----------------------------------------------------------------------------------------------------------------------------------------------------------------------------------------------------------------------------------------------------------------------------------------------------------------------------------------------------------------------------------------|--------------------------------------------------------------------------------------------------------|----------------------------------------------------------------------------|---------------------------------------------------------------------------------------------|
|                         |           | <p>the study, completing follow-up, and analysed)<br/>                 (b) Give reasons for non-participation at each stage.<br/>                 (c) Consider use of a flow diagram</p>                                                                                                                                                                                               |                                                                                                        | <p>be described in the text and/or by means of the study flow diagram.</p> | <p>they co-authored a relevant publication in the study period as described in methods.</p> |
| <p>Descriptive data</p> | <p>14</p> | <p>(a) Give characteristics of study participants (<i>e.g.</i>, demographic, clinical, social) and information on exposures and potential confounders<br/>                 (b) Indicate the number of participants with missing data for each variable of interest<br/>                 (c) <i>Cohort study</i> - summarise follow-up time (<i>e.g.</i>, average and total amount)</p> | <p>Table 3 in the results contains characteristics of study participants.</p>                          |                                                                            |                                                                                             |
| <p>Outcome data</p>     | <p>15</p> | <p><i>Cohort study</i> - Report numbers of outcome events or summary measures over time<br/> <i>Case-control study</i> - Report numbers in each exposure category, or summary measures of exposure<br/> <i>Cross-sectional study</i> - Report numbers of outcome events or summary measures</p>                                                                                        | <p>NA</p>                                                                                              |                                                                            |                                                                                             |
| <p>Main results</p>     | <p>16</p> | <p>(a) Give unadjusted estimates and, if applicable, confounder-adjusted estimates and their precision (<i>e.g.</i>, 95% confidence interval). Make clear which confounders were adjusted for and why they were included<br/>                 (b) Report category boundaries when continuous variables were categorized</p>                                                            | <p>In results in Table 3 <i>eg.</i> (b) Phases of the network (time) were based on funding cycles.</p> |                                                                            |                                                                                             |

|                          |    |                                                                                                                                                                            |                                                                                                               |                                                                                                                                                                                                                                                                                                          |    |
|--------------------------|----|----------------------------------------------------------------------------------------------------------------------------------------------------------------------------|---------------------------------------------------------------------------------------------------------------|----------------------------------------------------------------------------------------------------------------------------------------------------------------------------------------------------------------------------------------------------------------------------------------------------------|----|
|                          |    | (c) If relevant, consider translating estimates of relative risk into absolute risk for a meaningful time period                                                           |                                                                                                               |                                                                                                                                                                                                                                                                                                          |    |
| Other analyses           | 17 | Report other analyses done— e.g., analyses of subgroups and interactions, and sensitivity analyses                                                                         | Table 3 in results eg. Descriptive counts and percentages. Network measures as described in methods section.  |                                                                                                                                                                                                                                                                                                          |    |
| <b>Discussion</b>        |    |                                                                                                                                                                            |                                                                                                               |                                                                                                                                                                                                                                                                                                          |    |
| Key results              | 18 | Summarise key results with reference to study objectives                                                                                                                   | Paragraph 1 of Discussion                                                                                     |                                                                                                                                                                                                                                                                                                          |    |
| Limitations              | 19 | Discuss limitations of the study, taking into account sources of potential bias or imprecision. Discuss both direction and magnitude of any potential bias                 | Discussion – under heading ‘strengths and limitations’                                                        | RECORD 19.1: Discuss the implications of using data that were not created or collected to answer the specific research question(s). Include discussion of misclassification bias, unmeasured confounding, missing data, and changing eligibility over time, as they pertain to the study being reported. | NA |
| Interpretation           | 20 | Give a cautious overall interpretation of results considering objectives, limitations, multiplicity of analyses, results from similar studies, and other relevant evidence | Discussion - The results of the study are compared to findings from other national and international studies. |                                                                                                                                                                                                                                                                                                          |    |
| Generalisability         | 21 | Discuss the generalisability (external validity) of the study results                                                                                                      | Discussion - The lack of generalisability to other settings is noted                                          |                                                                                                                                                                                                                                                                                                          |    |
| <b>Other Information</b> |    |                                                                                                                                                                            |                                                                                                               |                                                                                                                                                                                                                                                                                                          |    |
| Funding                  | 22 | Give the source of funding and the role of the funders for the present study and, if applicable,                                                                           | Funding source provided to the BMJ Quality and Safety                                                         |                                                                                                                                                                                                                                                                                                          |    |

|                                                           |  |                                                              |                                                                                                             |                                                                                                                                                          |                                                                                                                                                                             |
|-----------------------------------------------------------|--|--------------------------------------------------------------|-------------------------------------------------------------------------------------------------------------|----------------------------------------------------------------------------------------------------------------------------------------------------------|-----------------------------------------------------------------------------------------------------------------------------------------------------------------------------|
|                                                           |  | for the original study on which the present article is based | Journal, though it is not in the article (at this stage) for the Journal has a triple blind review process. |                                                                                                                                                          |                                                                                                                                                                             |
| Accessibility of protocol, raw data, and programming code |  | ..                                                           |                                                                                                             | RECORD 22.1: Authors should provide information on how to access any supplemental information such as the study protocol, raw data, or programming code. | Noted in the BMJ Quality and Safety submission process that the data is available on reasonable request to the corresponding author, and it adheres to the ethics approval. |

\*Reference: Benchimol EI, Smeeth L, Guttman A, Harron K, Moher D, Petersen I, Sørensen HT, von Elm E, Langan SM, the RECORD Working Committee. The REporting of studies Conducted using Observational Routinely-collected health Data (RECORD) Statement. *PLoS Medicine* 2015; in press.

\*Checklist is protected under Creative Commons Attribution ([CC BY](https://creativecommons.org/licenses/by/4.0/)) license.

# BMJ Open

## Collaboration and knowledge generation in an 18- year quality improvement research program in Australian Indigenous primary health care: a co-authorship network analysis

|                                 |                                                                                                                                                                                                                                                                                                                                                                                                                                                                                                                                                                                                                                                                                                                                                                                                                                                                                                                                                                                                                                                                                                                                                              |
|---------------------------------|--------------------------------------------------------------------------------------------------------------------------------------------------------------------------------------------------------------------------------------------------------------------------------------------------------------------------------------------------------------------------------------------------------------------------------------------------------------------------------------------------------------------------------------------------------------------------------------------------------------------------------------------------------------------------------------------------------------------------------------------------------------------------------------------------------------------------------------------------------------------------------------------------------------------------------------------------------------------------------------------------------------------------------------------------------------------------------------------------------------------------------------------------------------|
| Journal:                        | <i>BMJ Open</i>                                                                                                                                                                                                                                                                                                                                                                                                                                                                                                                                                                                                                                                                                                                                                                                                                                                                                                                                                                                                                                                                                                                                              |
| Manuscript ID                   | bmjopen-2020-045101.R1                                                                                                                                                                                                                                                                                                                                                                                                                                                                                                                                                                                                                                                                                                                                                                                                                                                                                                                                                                                                                                                                                                                                       |
| Article Type:                   | Original research                                                                                                                                                                                                                                                                                                                                                                                                                                                                                                                                                                                                                                                                                                                                                                                                                                                                                                                                                                                                                                                                                                                                            |
| Date Submitted by the Author:   | 17-Apr-2021                                                                                                                                                                                                                                                                                                                                                                                                                                                                                                                                                                                                                                                                                                                                                                                                                                                                                                                                                                                                                                                                                                                                                  |
| Complete List of Authors:       | Bailie, Jodie; The University of Sydney, University Centre for Rural Health; The University of Sydney, School of Public Health<br>Potts, Boyd; The University of Sydney, University Centre for Rural Health<br>Laycock, Alison; The University of Sydney, University Centre for Rural Health<br>Abimbola, Seye; The University of Sydney, School of Public Health; University of New South Wales, The George Institute for Global Health<br>Bailie, Ross; University of Sydney, University Centre for Rural Health<br>Cunningham, Frances; Charles Darwin University, Menzies School of Health Research<br>Matthews, Veronica; The University of Sydney, University Centre for Rural Health<br>Bainbridge, Roxanne; Central Queensland University, School of Health, Medical and Applied Sciences<br>Conte, Kathleen; The University of Sydney, University Centre for Rural Health; DePaul University, School of Public Health<br>Passey, Megan; The University of Sydney, University Centre for Rural Health<br>Peiris, David; University of New South Wales, The George Institute for Global Health; The University of Sydney, The School of Public Health |
| <b>Primary Subject Heading</b>: | Health services research                                                                                                                                                                                                                                                                                                                                                                                                                                                                                                                                                                                                                                                                                                                                                                                                                                                                                                                                                                                                                                                                                                                                     |
| Secondary Subject Heading:      | Health policy, Public health                                                                                                                                                                                                                                                                                                                                                                                                                                                                                                                                                                                                                                                                                                                                                                                                                                                                                                                                                                                                                                                                                                                                 |
| Keywords:                       | Health policy < HEALTH SERVICES ADMINISTRATION & MANAGEMENT, PRIMARY CARE, Quality in health care < HEALTH SERVICES ADMINISTRATION & MANAGEMENT                                                                                                                                                                                                                                                                                                                                                                                                                                                                                                                                                                                                                                                                                                                                                                                                                                                                                                                                                                                                              |
|                                 |                                                                                                                                                                                                                                                                                                                                                                                                                                                                                                                                                                                                                                                                                                                                                                                                                                                                                                                                                                                                                                                                                                                                                              |

SCHOLARONE™  
Manuscripts





I, the Submitting Author has the right to grant and does grant on behalf of all authors of the Work (as defined in the below author licence), an exclusive licence and/or a non-exclusive licence for contributions from authors who are: i) UK Crown employees; ii) where BMJ has agreed a CC-BY licence shall apply, and/or iii) in accordance with the terms applicable for US Federal Government officers or employees acting as part of their official duties; on a worldwide, perpetual, irrevocable, royalty-free basis to BMJ Publishing Group Ltd ("BMJ") its licensees and where the relevant Journal is co-owned by BMJ to the co-owners of the Journal, to publish the Work in this journal and any other BMJ products and to exploit all rights, as set out in our [licence](#).

The Submitting Author accepts and understands that any supply made under these terms is made by BMJ to the Submitting Author unless you are acting as an employee on behalf of your employer or a postgraduate student of an affiliated institution which is paying any applicable article publishing charge ("APC") for Open Access articles. Where the Submitting Author wishes to make the Work available on an Open Access basis (and intends to pay the relevant APC), the terms of reuse of such Open Access shall be governed by a Creative Commons licence – details of these licences and which [Creative Commons](#) licence will apply to this Work are set out in our licence referred to above.

Other than as permitted in any relevant BMJ Author's Self Archiving Policies, I confirm this Work has not been accepted for publication elsewhere, is not being considered for publication elsewhere and does not duplicate material already published. I confirm all authors consent to publication of this Work and authorise the granting of this licence.

# TITLE PAGE

## Title

Collaboration and knowledge generation in an 18- year quality improvement research program in Australian Indigenous primary health care: a co-authorship network analysis

## Authors

Jodie Bailie<sup>1,2,\*</sup>

Boyd Alexander Potts<sup>1</sup>

Alison Frances Laycock<sup>1</sup>

Seye Abimbola<sup>2,3</sup>

Ross Stewart Bailie<sup>1</sup>

Frances Clare Cunningham<sup>4</sup>

Veronica Matthews<sup>1</sup>

Roxanne Gwendalyn Bainbridge<sup>5</sup>

Kathleen Parker Conte<sup>1</sup>

Megan Elizabeth Passey<sup>1</sup>

David Peiris<sup>2,3</sup>

## Affiliations

<sup>1</sup>University Centre for Rural Health, The University of Sydney, Lismore, NSW, Australia

<sup>2</sup>School of Public Health, The University of Sydney, Sydney, NSW, Australia

<sup>3</sup>The George Institute for Global Health, The University of New South Wales, Sydney, NSW, Australia

<sup>4</sup>Menzies School of Health Research, Charles Darwin University, Brisbane, QLD, Australia

<sup>5</sup>Centre for Indigenous Health Equity, Central Queensland University, Cairns, QLD, Australia

## \* Corresponding author

61 Uralba Street, Lismore, NSW 2480, Australia

Email: [jodie.bailie@sydney.edu.au](mailto:jodie.bailie@sydney.edu.au)

## Key words

Quality improvement; collaboration; research networks; social network analysis; co-authorship network analysis; evaluation; innovation platforms; partnership research

# 1 ABSTRACT

## 2 Objectives

3 Though multidisciplinary research networks support the practice and effectiveness of continuous  
4 quality improvement (CQI) programs, their characteristics and development are poorly understood. In  
5 this study we examine publication outputs from a research network in Australian Indigenous primary  
6 health care (PHC) to assess to what extent the research network changed over time.

## 7 Setting

8 Australian CQI research network in Indigenous PHC from 2002 - 2019.

## 9 Participants

10 Authors from peer-reviewed journal articles and books published by the network.

## 11 Design

12 Co-author networks across four phases of the network (2002–04; 2005–09; 2010–14; 2015–19) were  
13 constructed based on author affiliations and examined using social network analysis methods.  
14 Descriptive characteristics included organisation types, Indigenous representation, gender, student  
15 authorship and thematic research trends.

## 16 Results

17 We identified 128 publications written by 308 individual authors from 79 different organisations.  
18 Publications increased in number and diversity over each funding phase. During the final phase,  
19 publication outputs accelerated for organisations, students, project officers, Indigenous and female  
20 authors. Over time there was also a shift in research themes to encompass new clinical areas and social,  
21 environmental or behavioural determinants of health. Average degree (8.1), clustering (0.81) and  
22 diameter (3) indicated a well-connected network, with a core-periphery structure in each phase ( $p \leq 0.03$ )  
23 rather than a single central organisation (degree-centralisation=0.55-0.65). Academic organisations  
24 dominated the core structure in all funding phases.

## 25 Conclusion

26 Collaboration in publications increased with network consolidation and expansion. Increased  
27 productivity was associated with increased authorship diversity and a decentralised network, suggesting

1  
2  
3 1 these may be important factors in enhancing research impact and advancing the knowledge and practice  
4 2 of CQI in primary health care. Publication diversity and growth occurred mainly in the fourth phase,  
5 3 suggesting long-term relationship building among diverse partners is required to facilitate participatory  
6 4 research in CQI. Despite improvements, further work is needed to address inequities in female  
7 5 authorship and Indigenous authorship.  
8  
9  
10  
11  
12  
13  
14  
15  
16  
17  
18  
19  
20  
21  
22  
23  
24  
25  
26  
27  
28  
29  
30  
31  
32  
33  
34  
35  
36  
37  
38  
39  
40  
41  
42  
43  
44  
45  
46  
47  
48  
49  
50  
51  
52  
53  
54  
55  
56  
57  
58  
59  
60

For peer review only

## STRENGTHS AND LIMITATIONS OF THIS STUDY

- A study strength was the long timeframe of 18 years of publications from an Australian quality improvement research network.
- To the best of our knowledge, this study is the first to describe a CQI research network using co-authorship network analysis
- Our analysis does not include the multiple affiliations of many of the authors and so may under-report the level of collaboration.
- Co-authorship is only one indicator of collaboration, though it has several advantages to relying on it as a proxy for assessing research collaboration including its verifiability, stability over time, and availability in the public domain.
- Many other collaborative efforts are not reflected in co-authorship metrics, such as collaborations that continue to occur through co-authorship, grant submissions, and conference presentations.

## 1 INTRODUCTION

2 Over the past two decades, continuous quality improvement (CQI) programs have been widely taken  
3 up by primary healthcare (PHC) services caring for Aboriginal and Torres Strait Islander people  
4 (hereafter respectfully referred to as Indigenous people, acknowledging their cultural and historical  
5 diversity) across Australia.(1, 2) CQI – a set of methods for improving the quality of care, through  
6 continuous measurement and problem-solving techniques(3, 4) – has been found to improve the quality  
7 of care delivered in Indigenous PHC.(1, 5)

8 While evidence indicates no single model of CQI outperforms others, the most successful applications  
9 of CQI are multi-site and multi-faceted approaches that aim to achieve change at various levels of the  
10 health system.(6) We and others have argued the need for multidisciplinary research networks to  
11 support the practice and effectiveness of CQI (6, 7) and to foster co-production and sharing of  
12 knowledge. However, despite research networks often being touted as a solution for enhancing  
13 knowledge translation into policy and practice, their characteristics and emergence over time are poorly  
14 understood.(8-10) Furthermore, evaluation challenges can be considerable because research networks  
15 are often loosely defined and manifest in different forms with formal and informal organisational  
16 structures.(11, 12)

17 We sought to better understand the development and growth of a multidisciplinary research network in  
18 Indigenous PHC quality improvement, and how these aspects reflected the vision of the network with  
19 respect to capacity strengthening, equity and membership diversity. Co-authorship network analysis  
20 offers one feasible strategy for evaluating the growth and emergence of research networks, because  
21 publications are well documented and reflect collaboration.(13-15) The study uses co-authorship  
22 network analysis to examine the growth and change in an 18-year CQI research network in Australian  
23 Indigenous primary health care. We address the question: How did the research network expand and  
24 change over time? Specifically we will investigate the extent to which the research network brought  
25 together people from a variety of organisations; the structural characteristics of the network; the level  
26 of equity in authorship relative to Indigenous status and gender; capacity strengthening efforts through  
27 examining student authorship; and changes in research themes over time.

### 28 The setting

29 Although Australia has a high-performing health system, underpinned by a universal health insurance  
30 scheme, it ranks low on measures of equity when compared with other Organisation for Economic Co-  
31 operation and Development (OECD) nations.(16) This ranking is reflected in consistent  
32 underperformance in addressing inequities in health care access, quality of care and outcomes for  
33 Indigenous people.(17-19) These inequities are underpinned by a legacy of colonisation, land

1  
2  
3 1 dispossession, displacement, disempowerment, social and economic exclusion, and ongoing racial  
4 2 discrimination.(19, 20)

5  
6  
7 3 To help address these inequities, the Audit and Best Practice in Chronic Disease (ABCD) participatory  
8 4 action research program was initiated in 2002. Drawing on international evidence about the  
9 5 effectiveness of system-wide CQI approaches to improve the quality of PHC service delivery,(21) the  
10 6 ABCD program employed a systems approach to support the CQI efforts of PHC services established  
11 7 to provide care for Indigenous Australians.(1, 6, 22) Connected to this research program, in 2010 a  
12 8 national, not-for-profit, CQI support entity – One21seventy – was established to support Indigenous  
13 9 PHC services in implementing CQI cycles using standardised, evidence-based, best practice clinical  
14 10 audit and systems assessment tools. Notably, 175 of the over 275 PHC centres involved provided the  
15 11 research network with de-identified data derived from their use of the CQI tools and processes. The  
16 12 studies published by network members reporting analyses of these data form a comprehensive picture  
17 13 of the quality of PHC received by Indigenous people around Australia. (1) Between 2010 and 2016,  
18 14 ABCD research accounted for 42 of the 60 (70%) peer-reviewed publications identified in a systematic  
19 15 review on CQI in Indigenous PHC in Australia,(2) and also made a significant contribution to  
20 16 international CQI research.(23) Importantly, although there were demonstrated improvements in quality  
21 17 of care in some areas of clinical care, there was continuing wide variation between PHC centres and  
22 18 jurisdictions.(1,5)

23  
24  
25  
26  
27  
28  
29  
30  
31  
32  
33 19 Table 1 sets out the four distinct phases of the ABCD program's evolution from 2002 to December  
34 20 2019, its research aims, systems-strengthening dimensions and main findings. The intention of the  
35 21 resulting network was an 'open collaboration' that actively encourages cooperation with other  
36 22 organisations and individuals to help achieve the program's aims. The current phase of research (2020-  
37 23 24) is included in Table 1 but was not part of this study.



Table 1: Phases and research focus of the ABCD program, an action research project implementing quality improvement in Indigenous PHC, 2002–2019

|                      | <b>Phase 1</b><br>Exploring feasibility and acceptability of CQI tools and processes | <b>Phase 2</b><br>Exploring scalability and expansion of CQI                        | <b>Phase 3</b><br>Supporting wide-scale implementation of CQI and development of Partnership Learning Model | <b>Phase 4</b><br>Embedding CQI approaches in systems                                                                                                                | Current Phase (not part of study)<br>Strengthening leadership and engagement in system wide CQI                                                                                            |                                                                                                                                                                                                                                                                                  |
|----------------------|--------------------------------------------------------------------------------------|-------------------------------------------------------------------------------------|-------------------------------------------------------------------------------------------------------------|----------------------------------------------------------------------------------------------------------------------------------------------------------------------|--------------------------------------------------------------------------------------------------------------------------------------------------------------------------------------------|----------------------------------------------------------------------------------------------------------------------------------------------------------------------------------------------------------------------------------------------------------------------------------|
|                      | <b>ABCD (2002–2004)</b>                                                              | <b>ABCD Extension (2005–2009)</b>                                                   | <b>ABCD National Research Partnership (2010–2014)</b>                                                       | <b>One21seventy (2010–2016) service support arm</b>                                                                                                                  | <b>Centre for Research Excellence in Integrated Quality Improvement (CRE-IQI) (2015–2019)</b>                                                                                              | Centre for Research Excellence in Strengthening Systems for Indigenous Health Care Equity (CRE-STRIDE) 2020–2024 <sup>#</sup>                                                                                                                                                    |
| <b>Research aims</b> | Explore whether a CQI approach was feasible and effective in Indigenous PHC.(24)     | Identify support requirements for large-scale implementation of the ABCD model.(25) | Understand variation in quality of care and strategies for improvement.(22)                                 | Primarily a service support function. Voluntary contribution of data by services for research purposes, and potential for other involvement of services in research. | <ul style="list-style-type: none"> <li>— Accelerate and strengthen large-scale CQI efforts.</li> <li>— Explore the feasibility/functioning of an ‘innovation platform.’(26, 27)</li> </ul> | <ul style="list-style-type: none"> <li>— Strengthen Aboriginal and Torres Strait Islander research leadership for CQI.</li> <li>— Extend CQI methods to sectors beyond the PHC clinical environment.(28)</li> <li>— Enhance community participation in CQI processes.</li> </ul> |

1  
2  
3  
4  
5  
6  
7  
8  
9  
10  
11  
12  
13  
14  
15  
16  
17  
18  
19  
20  
21  
22  
23  
24  
25  
26  
27  
28  
29  
30  
31  
32  
33  
34  
35  
36  
37  
38  
39  
40  
41  
42  
43  
44  
45  
46

**Health system strengthening dimension**

|                                                                                                                                                                                                                                                                                                                                                                                                                                                                                                         |                                                                                                                                                                                                                                                                                                                                                                                                                                                                                  |                                                                                                                                                                                                                                                                                                                                                                                                                                      |                                                                                                                                                                                                                                                                                                                                      |                                                                                                                                                                                                                                                                                                                                                                         |                                                                                                                                                                                                                                                                                                                           |
|---------------------------------------------------------------------------------------------------------------------------------------------------------------------------------------------------------------------------------------------------------------------------------------------------------------------------------------------------------------------------------------------------------------------------------------------------------------------------------------------------------|----------------------------------------------------------------------------------------------------------------------------------------------------------------------------------------------------------------------------------------------------------------------------------------------------------------------------------------------------------------------------------------------------------------------------------------------------------------------------------|--------------------------------------------------------------------------------------------------------------------------------------------------------------------------------------------------------------------------------------------------------------------------------------------------------------------------------------------------------------------------------------------------------------------------------------|--------------------------------------------------------------------------------------------------------------------------------------------------------------------------------------------------------------------------------------------------------------------------------------------------------------------------------------|-------------------------------------------------------------------------------------------------------------------------------------------------------------------------------------------------------------------------------------------------------------------------------------------------------------------------------------------------------------------------|---------------------------------------------------------------------------------------------------------------------------------------------------------------------------------------------------------------------------------------------------------------------------------------------------------------------------|
| <ul style="list-style-type: none"> <li>— Using participatory action research, a CQI process was introduced to 12 Indigenous PHC centres in one jurisdiction (Northern Territory) with a focus on the prevention and management of chronic disease.(29)</li> <li>— CQI approach embraced to improve (and demonstrate) quality of care.</li> <li>— Systems assessment tool provided a mechanism for ongoing local system improvement and integration with other organisations and sectors.(30)</li> </ul> | <ul style="list-style-type: none"> <li>— Geographic scope of the project was extended to include 69 Indigenous PHC services in several jurisdictions across Australia.</li> <li>— Scope was broadened to address other priority areas of PHC, with audit tools for additional areas of care.</li> <li>— Informed health system planning and policy by showing how the ABCD approach could be scaled up, and examined barriers/enablers to engagement and improvement.</li> </ul> | <ul style="list-style-type: none"> <li>— More than 175 Indigenous PHC services across Australia involved in ABCD program.(31)</li> <li>— Brought together stakeholders from across jurisdictions and levels of the health system to support and guide research on priority PHC health system issues, and to contribute to refining CQI tools and processes, interpreting data, applying findings and sharing lessons.(31)</li> </ul> | <p>Provided CQI training and tools with systems thinking focus, and web-based data analysis and reporting system able to provide local and aggregated data reports, with benchmarking. 275 + health services used ABCD tools and processes, and more than 2500 PHC staff were trained in the use of CQI tools and processes.(31)</p> | <ul style="list-style-type: none"> <li>— Adapted and extended the Partnership Learning Model, developed through previous phases of the research, by engaging with a wider range of stakeholders responsible for Indigenous PHC to solve problems and innovate together.</li> <li>— Emphasis on research capacity strengthening and research translation.(32)</li> </ul> | <ul style="list-style-type: none"> <li>— Develop new knowledge to strengthen integration in comprehensive PHC and embed CQI at all levels of the PHC system.</li> <li>— Strengthen Indigenous community input into improving CQI processes.</li> <li>— Extend CQI processes and collaborations across sectors.</li> </ul> |
|---------------------------------------------------------------------------------------------------------------------------------------------------------------------------------------------------------------------------------------------------------------------------------------------------------------------------------------------------------------------------------------------------------------------------------------------------------------------------------------------------------|----------------------------------------------------------------------------------------------------------------------------------------------------------------------------------------------------------------------------------------------------------------------------------------------------------------------------------------------------------------------------------------------------------------------------------------------------------------------------------|--------------------------------------------------------------------------------------------------------------------------------------------------------------------------------------------------------------------------------------------------------------------------------------------------------------------------------------------------------------------------------------------------------------------------------------|--------------------------------------------------------------------------------------------------------------------------------------------------------------------------------------------------------------------------------------------------------------------------------------------------------------------------------------|-------------------------------------------------------------------------------------------------------------------------------------------------------------------------------------------------------------------------------------------------------------------------------------------------------------------------------------------------------------------------|---------------------------------------------------------------------------------------------------------------------------------------------------------------------------------------------------------------------------------------------------------------------------------------------------------------------------|

|                          |                                                                                                                                                                        |                                                                                                                                                                                                                                                |                                                                                                                                                                                                                                                                                                                                     |                                                                                                                                                                                                   |                                                                                                                                                                                                                                                                                                                                                                                                                                                                                           |                |
|--------------------------|------------------------------------------------------------------------------------------------------------------------------------------------------------------------|------------------------------------------------------------------------------------------------------------------------------------------------------------------------------------------------------------------------------------------------|-------------------------------------------------------------------------------------------------------------------------------------------------------------------------------------------------------------------------------------------------------------------------------------------------------------------------------------|---------------------------------------------------------------------------------------------------------------------------------------------------------------------------------------------------|-------------------------------------------------------------------------------------------------------------------------------------------------------------------------------------------------------------------------------------------------------------------------------------------------------------------------------------------------------------------------------------------------------------------------------------------------------------------------------------------|----------------|
| <b>Research findings</b> | CQI approach was well accepted, demonstrated the feasibility and application of tools and processes, and showed improvements in care and intermediate health outcomes. | <ul style="list-style-type: none"> <li>— Identified key barriers and enablers to scaling up in an Indigenous context.(33)</li> <li>— Established the need for further tools to support the implementation of CQI in Indigenous PHC.</li> </ul> | <ul style="list-style-type: none"> <li>— Demonstrated improvements in quality of care in some areas, and continuing wide variation between PHC centres and jurisdictions.(1,5)</li> <li>— Developed Partnership Learning Model to achieve large-scale improvements in quality of care and population health outcomes.(6)</li> </ul> | <ul style="list-style-type: none"> <li>— + 70% of PHC centres engaged in One21seventy provided their de-identified data to the ABCD National Research Partnership for use in research.</li> </ul> | <ul style="list-style-type: none"> <li>— Established that clinical and other areas such as community health promotion and prevention outcomes can be improved by using evidence-based CQI tools and processes.(34)</li> <li>— Identified factors that support the effective use of CQI by PHC teams and services, and improvements in delivery of care.(35)</li> <li>— Identified priorities for strengthening PHC systems to achieve large-scale health improvements.(36, 37)</li> </ul> | Not applicable |
|--------------------------|------------------------------------------------------------------------------------------------------------------------------------------------------------------------|------------------------------------------------------------------------------------------------------------------------------------------------------------------------------------------------------------------------------------------------|-------------------------------------------------------------------------------------------------------------------------------------------------------------------------------------------------------------------------------------------------------------------------------------------------------------------------------------|---------------------------------------------------------------------------------------------------------------------------------------------------------------------------------------------------|-------------------------------------------------------------------------------------------------------------------------------------------------------------------------------------------------------------------------------------------------------------------------------------------------------------------------------------------------------------------------------------------------------------------------------------------------------------------------------------------|----------------|

1  
2  
3  
4  
5  
6  
7  
8  
9  
10  
11  
12  
13  
14  
15  
16  
17  
18  
19  
20  
21  
22  
23  
24  
25  
26  
27  
28  
29  
30  
31  
32  
33  
34  
35  
36  
37  
38  
39  
40  
41  
42  
43  
44  
45  
46

|                                    |                                                                                                       |                                                                                                                                  |                                    |                                                   |                                                            |                                                            |
|------------------------------------|-------------------------------------------------------------------------------------------------------|----------------------------------------------------------------------------------------------------------------------------------|------------------------------------|---------------------------------------------------|------------------------------------------------------------|------------------------------------------------------------|
| <b>Funding source</b> <sup>+</sup> | NHMRC Fellowship.<br>Grant Number: #283303<br>Cooperative Research<br>Centre for Aboriginal<br>Health | Cooperative Research<br>Centre for Aboriginal<br>Health and the Australian<br>Commission on Safety and<br>Quality in Health Care | NHMRC Partnership<br>Scheme #54267 | Not-for-profit / cost-<br>recovery service agency | NHMRC Centres of<br>Research Excellence<br>Scheme #1078927 | NHMRC Centres of<br>Research Excellence Scheme<br>#1170882 |
|------------------------------------|-------------------------------------------------------------------------------------------------------|----------------------------------------------------------------------------------------------------------------------------------|------------------------------------|---------------------------------------------------|------------------------------------------------------------|------------------------------------------------------------|

**NB:** ABCD – audit and best practice for chronic disease; CQI – continuous quality improvement; PHC – primary health care; NHMRC – National Health and Medical Research Council

**Source:** Adapted from Bailie et al. 2013

+ Although the projects were supported by research funding, it is important to note there were financial contributions and in-kind support from a range of community-controlled and government agencies.

# CRE-STRIDE is the current form of the network, and its successful funding underscores the research program’s longevity and stability.

For peer review only

## METHODS

We used social network analysis, as described by Fonseca and co-authors(13) in their health sector co-authorship network analysis, to retrieve scientific publications, standardise entries for authors and organisations, visualise the network and calculate metrics.

### Data retrieval

Details of peer-reviewed journal articles and books (the ‘publications’) were retrieved from administrative records held by the Centre for Research Excellence in Integrated Quality Improvement (CRE-IQI) coordinating centre, and included all publications published from 2002–2019.

### Data categorisation, standardisation, and cleaning

Publications were sorted into categories and research themes that were iteratively developed and defined by JB and RSB. We describe the process for categorisation of included publications below.

**Organisations:** the affiliations of the authors (as per their citation on publications) were coded into Universities and Research Institutes; Government Departments; Health Services; Affiliates; Primary Health Networks; and Non-Government Organisations. Where authors had more than one affiliation listed on the publication, we used the first affiliation provided. Other key points in the categorisation of publications were as follows:

- We used the author’s University rather than their specific Department and, if named, the Research Institute rather than the University.
- Where an author’s affiliation was nominated as a hospital we used the State Health Department with which these organisations were affiliated.
- ‘Affiliates’ refers to regional support organisations established to support Indigenous health services, such as Aboriginal Medical Services Alliance Northern Territory.
- ‘Health Service’ refers to services established primarily to provide PHC to Indigenous people, and includes Aboriginal community-controlled services, Government services, and private General Practice.
- Primary Health Networks refer to independent regional PHC organisations across Australia that commission rather than provide services, as established by the Australian Government in July 2015.
- Non-Government Organisations refer to not-for-profit organisations that operate independently of Government, typically with the purpose of addressing a social or political issue.

**Research themes:** Publications were assigned to one of the following three research themes:

1. *CQI-related program activities that address clinical care delivery in the PHC setting:* publications that focus on the quality, and variations in delivery, of clinical care, and the application of, or learning from, CQI techniques in relation to a specific aspect of clinical care, e.g., child health and chronic illness care.
2. *CQI-related program activities that address social, environmental or behavioural determinants – i.e. community health promotion or prevention activities:* publications that focus on the application of, or learning from, CQI with a focus on areas such as health promotion, social and environmental conditions, housing, food security, and family wellbeing in general community settings.
3. *CQI-related processes and approaches:* publications related to CQI program development (such as study protocols and reviews informing CQI approaches), health systems strengthening, and the development and evaluation of research collaborations and their impact.

In categorising the publications by research themes, abstracts of publications were retrieved and screened by blinded reviewers (JB and RSB). Inconsistencies in reviewer assessments were resolved by consensus.

**Role type:** We identified all authors who were students or project officers at the time of the publication, and who had authored in this capacity. The student category included Public Health Trainees, and Masters, PhD, and Medical Honours students. Project officers were identified as those whose primary role supported research, and/or related either to health care administration and/or to project work.

**Indigenous status:** Coordinating centre records flagged authors who identified as Indigenous.

**Gender:** Authors were assigned a male or female category through a number of ways – reviewer knowledge of authors and Google searches.

Where there was uncertainty in allocating the above categories, JB checked with RSB and, when necessary, with the corresponding authors of the manuscripts. Data were entered into an Excel spreadsheet, and then standardised and cleaned by JB and BAP.

## Network assembly, visualisation and analysis

The evolution of the research network was analysed over the four phases displayed in Table 1, with the analysis split into three parts: 1) an analysis of publications by type of organisation represented, research themes, the role of authors, and the Indigenous status of authors; 2) the network analysis of co-authorship between organisations; and 3) a core-periphery analysis of organisational position within the network.

Python programming language version 3.7.4(38) and the *Jupyter Notebook*(39) application accessed through the *Anaconda Navigator*(40) interface were used to script all data manipulation and analytical

1 work. Network analyses used the Python package *NetworkX*,<sup>(41)</sup> with visualisations produced with the  
2 open-source *Gephi* program.<sup>(42)</sup>

3 We first created a node list containing every organisation and its attributes (unique identifier,  
4 organisation name, type and years published), and an edge list representing co-authorship as pairwise  
5 combinations of each organisation listed on a publication and its unique attributes.

6 A single, undirected edge of weight=1 was assigned for each organisation pair that shared at least one  
7 publication in each phase of the network. For publications that involved only authors from the same  
8 organisation, a self-loop edge of weight=0 was assigned. No additional weight was given to the number  
9 of publications or authors involved or any other attribute. This approach was chosen so that results of  
10 the analysis could be directly interpreted in the context of inter-organisational collaboration.

11 Networks were analysed discretely across the four phases. Several network measures (defined in Table  
12 2) were used to understand the resulting networks.

13 *Table 2: Theoretical definitions of social network analysis measures, and their meaning in this study*

| Measure                 | Definition, meaning in this study, and importance                                                                                                                                                                                                                                                                                                                                                                                                                                                                                       |
|-------------------------|-----------------------------------------------------------------------------------------------------------------------------------------------------------------------------------------------------------------------------------------------------------------------------------------------------------------------------------------------------------------------------------------------------------------------------------------------------------------------------------------------------------------------------------------|
| Node                    | The basic unit of a network. Nodes represent organisations. The node size is proportional to the number of publications.                                                                                                                                                                                                                                                                                                                                                                                                                |
| Edge or Tie             | An edge or tie connects two nodes in a network, and indicates a relationship between the two. An edge between two organisations indicates co-authorship of at least one publication.                                                                                                                                                                                                                                                                                                                                                    |
| Density                 | The density of a network is the total number of edges divided by the total number of possible edges. It is a widely used measure that reflects the level of cohesion among network organisations, or the extent to which organisations collaborated with every other organisation in the network.                                                                                                                                                                                                                                       |
| Average degree          | Degree is a count of the number of connections for any given node: the higher the average degree, the more connected the network. The average number of inter-organisational collaborations per organisation.                                                                                                                                                                                                                                                                                                                           |
| Clustering co-efficient | Clustering is a measure of how many of the nodes connected to a given node are also connected to each other, which is expressed as a proportion of the total possible connections. The overall clustering co-efficient is the average across the network. Where density tells you how connected the network is, the clustering co-efficient tells you how well connected the various neighbourhoods of the network are. A high clustering co-efficient and low density can be an indication of lots of small groups, loosely connected. |



|                               |                                                                                                                                                                                                                                                                               |
|-------------------------------|-------------------------------------------------------------------------------------------------------------------------------------------------------------------------------------------------------------------------------------------------------------------------------|
| Path/path length              | The path is any connected series of edges between two nodes. The length of a path is the number of steps (edges) and shows how quickly organisations can communicate with each other through their links.                                                                     |
| Geodesic distance             | The geodesic distance is the shortest path of all possible options between two nodes in the network. The number of steps it takes to get across a network is a useful measure of how quickly information can be disseminated to the entire network.                           |
| Diameter                      | The diameter of the network is the ‘longest short path’ between nodes and indicates the maximum number of steps it would take to get between nodes that are furthest away from each other in the network. The diameter gives a useful indication of how broad the network is. |
| Centralisation                | This reflects how tightly the organisations are connected around the most central point of the network and how reliant the network may be on a central node.                                                                                                                  |
| Discrete core-periphery model | A network with a core-periphery structure has a ‘core’ of nodes densely connected to each other and to others, and ‘periphery’ nodes in the less-connected ‘periphery’ that are connected only to core nodes.                                                                 |

1

2 The analysis of network position at the organisational level uses discrete core-periphery analysis(43) to  
 3 identify organisations that are well connected to each other (the core) as distinct from those less well  
 4 connected (the periphery). To detect the core-periphery, we used the Borgatti and Everett(43) algorithm  
 5 and the non-parametric statistical test devised by Kojaku and Masuda(44).

## 6 Patient and public involvement

7 No patients or members of the public were involved in the design, analysis or reporting of this study.

## 8 RESULTS

9 We identified 128 publications written by 308 authors, with a median of six authors per publication  
 10 (Interquartile Range = 4–9.25), representing 79 different organisations (Table 3). Most authors (182 or  
 11 59.5%) contributed just one publication, while 18 (5.9%) contributed 10 or more. The chief investigator  
 12 (RSB) of the original ABCD program co-authored 97 of the 128 publications (Supplementary File 1).

13 *Table 3: Co-authorship characteristics, by phases and total 2002–2019*

| Indicator | Phase 1:<br>2002–<br>2004 | Phase 2:<br>2005–2009 | Phase 3:<br>2010–<br>2014 | Phase 4:<br>2015–2019 | Total:<br>2002–2019 |
|-----------|---------------------------|-----------------------|---------------------------|-----------------------|---------------------|
|-----------|---------------------------|-----------------------|---------------------------|-----------------------|---------------------|

|                                                                                              |                                  |            |                |             |            |               |
|----------------------------------------------------------------------------------------------|----------------------------------|------------|----------------|-------------|------------|---------------|
| Number of publications                                                                       |                                  | 2          | 15             | 21          | 90         | 128           |
| Number of different authors                                                                  |                                  | 5          | 33             | 67          | 263        | 308           |
| Number of authors per paper (median, IQR)                                                    |                                  | 5, [5 - 5] | 5, [3.5 - 8.5] | 9, [4 - 13] | 6, [5 - 9] | 6, [4 - 9.25] |
| <b>Organisational involvement</b>                                                            |                                  |            |                |             |            |               |
| Number of nodes (organisations)                                                              |                                  | 3          | 12             | 24          | 72         | 79            |
| Number and type of different organisations                                                   | University or Research Institute | 3          | 8              | 15          | 45         | 48            |
|                                                                                              | Government Department            | –          | 2              | 3           | 9          | 10            |
|                                                                                              | Affiliate                        | –          | 1              | 4           | 2          | 5             |
|                                                                                              | Health Service                   | –          | 1              | 2           | 11         | 11            |
|                                                                                              | Non-Government Organisation      | –          | –              | –           | 4          | 4             |
| Primary Health Network                                                                       | –                                | –          | –              | 1           | 1          |               |
| Number of publications with an author who has an international affiliation                   |                                  | 0          | 1              | 0           | 8          | 9             |
| <b>Capacity strengthening</b>                                                                |                                  |            |                |             |            |               |
| Number and percentage of publications with a student/project officer as a lead author        |                                  | 0 (0%)     | 2 (13%)        | 3 (14%)     | 25 (28%)   | 30 (23%)      |
| Number and percentage of publications with at least one student/project officer as an author |                                  | 2 (100%)   | 12 (80%)       | 13 (62%)    | 52 (58%)   | 79 (62%)      |
| <b>Addressing equity</b>                                                                     |                                  |            |                |             |            |               |
| Number and percentage of female authors                                                      |                                  | 1 (25%)    | 20 (60%)       | 39 (58%)    | 171 (65%)  | 192 (62%)     |
| Number and percentage of publications with a female first author                             |                                  | 0 (0%)     | 2 (13%)        | 14 (67%)    | 76 (84%)   | 92 (72%)      |
| Number and percentage of publications with a female last author                              |                                  | 0 (0%)     | 4 (27%)        | 6 (29%)     | 25 (28%)   | 35 (27%)      |
| Number and percentage of publications with at least one Indigenous author                    |                                  | 0 (0%)     | 6 (40%)        | 13 (62%)    | 56 (62%)   | 75 (59%)      |
| Number and percentage of publications with an Indigenous lead author                         |                                  | 0 (0%)     | 0 (0%)         | 2 (10%)     | 3 (3%)     | 5 (4%)        |
| Number and percentage of publications with an Indigenous last author                         |                                  | 0 (0%)     | 3 (20%)        | 0 (0%)      | 0 (0%)     | 0 (0%)        |
| <b>Thematic trends in publications</b>                                                       |                                  |            |                |             |            |               |

|                                                                |                                                                                 |          |               |               |                |                  |
|----------------------------------------------------------------|---------------------------------------------------------------------------------|----------|---------------|---------------|----------------|------------------|
| Thematic areas, number and percentage                          | CQI-related activities in clinical care                                         | 2 (100%) | 6 (40%)       | 8 (38%)       | 44 (49%)       | 60 (47%)         |
|                                                                | CQI activities in areas such as community-based health promotion and prevention | 0        | 2 (13%)       | 5 (24%)       | 16 (18%)       | 23 (18%)         |
|                                                                | Processes and approaches for CQI                                                | 0        | 7 (47%)       | 8 (38%)       | 30 (33%)       | 45 (35%)         |
| <b><i>Co-authorship network structural characteristics</i></b> |                                                                                 |          |               |               |                |                  |
| Density                                                        |                                                                                 | 1        | 0.45          | 0.47          | 0.11           | 0.13             |
| Average degree (organisations)                                 |                                                                                 | 2        | 5             | 10.9          | 8.1            | 9.8              |
| Centralisation (degree)                                        |                                                                                 | 0        | 0.65          | 0.57          | 0.55           | 0.53             |
| Clustering                                                     |                                                                                 | 1        | 0.80          | 0.86          | 0.81           | 0.79             |
| Geodesic distance                                              |                                                                                 | 1        | 1.5           | 1.5           | 2.1            | 2.1              |
| Diameter                                                       |                                                                                 | 1        | 2             | 2             | 3              | 3                |
| Core-periphery structure                                       |                                                                                 | 0        | 1 ( $p=.03$ ) | 1 ( $p=.01$ ) | 1 ( $p<.001$ ) | 0.42 ( $p=.83$ ) |

1 CQI: continuous quality improvement; IQR: interquartile range

## 2 **Linking people from a variety of organisations**

3 As shown in Table 3, there was an increase in the number and type of different organisations in the  
 4 network, with considerable growth from Phase 3 (24 organisations) to Phase 4 (72 organisations). Of  
 5 note, the number of Universities and Research Institutes increased from 15 in Phase 3 to 45 in Phase 4,  
 6 while Health Services rose from 2 to 11 and international organisations increased to 8. This growth in  
 7 different organisations participating in the research network over time was a result of existing  
 8 organisations continuing to publish together (yellow nodes), and new organisations co-authoring (blue  
 9 nodes) (Figure 1). A few organisations ceased publishing as part of the network (red nodes), shown as  
 10 'isolates'.

11 [INSERT FIGURE 1]

12 *Figure 1: Evolution of the quality improvement research network, 2002–2019*

## 13 **Relationships of organisations and structural characteristics**

14 The structural characteristics of the networks are based on the indicators shown in Table 3. Our analysis  
 15 of the network data shows a decrease in the network density. In Phase 2 and 3, the research network  
 16 was relatively well connected with ~46% of all possible relationships in the network actualised.  
 17 However, in Phase 4, with ~11% of all possible links existing between organisations, there was less  
 18 connectivity between organisations. The decrease in network density was linked to an increase in the

1  
2  
3 1 number of organisations publishing together in Phase 4, as noted above (Table 3), and an increase in  
4 the scope of CQI publications. However, the average clustering coefficient remained high across all  
5 2 phases (1, 0.80, 0.86, and 0.81 respectively), indicating a strong tendency for multiple organisations to  
6 3 be collaborating on individual publications. Part of this high effect is a natural consequence of authors  
7 4 publishing together – it introduces triangles of collaborating authors, thereby increasing the clustering  
8 5 co-efficient.  
9 6

10 7 From Table 3, we note that the average number of organisations collaborating directly on publications  
11 8 (average node degree) steadily increased from 2 in Phase 1, to 5, 10.9, and then 8.1 in subsequent  
12 9 phases. This is a sign that organisations collaborated more widely over time, with a small decrease in  
13 10 Phase 4. On average, publications involved 3.4 organisations, with 3.5 publications per organisation.  
14 11 This indicates a maturation of organisational relationships, typically creating more than one publication  
15 12 from each collaboration. Furthermore, network diameter was at-most 3 (Phase 4) and geodesic distance  
16 13 was at-most 2.1 (Phase 4). This indicates a close-knit cohesive network in which organisations were  
17 14 connected by no more than two other organisations, resulting in the network being unlikely to fragment  
18 15 and able to disseminate information quickly.

19 16 The degree-centralisation from Phase 2 was 0.65 followed by 0.57 and 0.55 in the subsequent phases.  
20 17 Conversely, the core-periphery analysis produced strong results in each phase (see Table 3). These  
21 18 analyses indicate that in all four phases the network was not connected via a single dominant central  
22 19 organisation but rather by a core-periphery structure that points to a more collaborative network.  
23 20 Intersectoral collaboration (research, government and/or health services) were represented in the core  
24 21 for phases 2 and 3 (green nodes in Figure 2). In Phase 4, the organisations comprising the core were all  
25 22 Universities or Research Institutes, indicating that Government Departments and Health Services were  
26 23 more likely to publish with them than with each other.

27  
28  
29  
30  
31  
32  
33  
34  
35  
36  
37  
38  
39  
40  
41 24 [INSERT FIGURE 2]

42  
43  
44 25 *Figure 2: Core periphery analysis by phases, 2002–2019*

## 45 26 **Equity in authorship**

46  
47  
48 27 Female first authors increased over time, growing from none in Phase 1 to 84% (n=76) in Phase 4 (Table  
49 28 3), with about 28% of the publications having a female senior or last author in all phases after the first.  
50 29 Although the number of publications led by Indigenous authors remained low, over time there was an  
51 30 increasing number and percentage with at least one Indigenous author. The greatest expansion was  
52 31 observed from Phase 3 to Phase 4 when the number of publications with at least one Indigenous author  
53 32 increased from 13 to 56 (Table 3).

## 54 33 **Providing opportunities for capacity strengthening**

1  
2  
3 1 Over time there was also an increase in absolute number (but a decline in percentage) of publications  
4 2 with at least one student or project officer author, from 2 in Phase 1 to 52 in Phase 4 (Table 3). Phase 4  
5 3 also saw an increase in student or project officer as lead author, with the largest growth in Phase 4 (28%,  
6 4 n=25) representing a two-fold increase from Phase 3 (14%, n=3).

## 5 **Expansion of research themes**

6 As the network evolved there was a notable growth in publications related to CQI and clinical care, an  
7 8 increase in publications related to social, environmental and behavioural determinants of health, and on  
9 9 the development of processes and approaches for CQI (Table 3). The growth in research themes in  
10 10 Phase 4 was consistent with the increase observed in the number of publications and organisations  
11 11 involved in this phase, and the emergence of new core organisations. Supplementary File 2 contains a  
12 12 listing of all publications and their assigned category of research themes.

## 12 **DISCUSSION**

13 This study examined the growth of and changes in an Australian quality improvement research network  
14 14 over an 18-year period by assessing co-authorship of publications using network analysis. Key findings  
15 15 include an expansion in the number of publications; a greater number and diversity of organisations co-  
16 16 authoring; improvements in capacity strengthening measures reflected in increased student and project  
17 17 officer authorship and first author position; and a broadening or scaling-out(45) of quality improvement  
18 18 work to other thematic areas. There is evidence, too, that the research network linked people from a  
19 19 variety of organisations, including Universities or Research Institutes, PHC services and Government  
20 20 Departments, who might otherwise have never worked together. This expansion potentially extended  
21 21 both the impact of the network and of the organisations involved.

22 The characteristics of the network showed a strong collaborative structure and a maturation of  
23 23 organisational relationships, with more than one publication typically developed by each collaborating  
24 24 organisation. Network analyses indicated a core-periphery structure of organisations connected to each  
25 25 other in each phase, rather than a network structured around a single central organisation. As there was  
26 26 the same Chief Investigator throughout the study period, this finding of a core-periphery structure  
27 27 indicates the network expanded to have other core organisations over time, and was not just centred on  
28 28 the Chief Investigators organisation. In phases 2 and 3, the relationships between research institutions  
29 29 and government departments were well represented in the network core. The network's founding  
30 30 partners maintained a consistent presence as members of the core, indicating that it remained dependent  
31 31 on these partners for collaboration. However, new core organisations emerged when key authors  
32 32 changed institutions, reflecting that individuals stimulated the expansion of core members. For example,  
33 33 a result of key individuals moving institutions and growing the publishing base was a Phase 4 core  
34 34 comprised solely of Universities and Research Institutes, while Health Service and Government

1  
2  
3 1 Organisations were part of the core in the earlier phases. This change occurred despite a large increase  
4  
5 2 in the number and type of organisations involved in the network in Phase 4.

6  
7 3 Network growth was greatest in Phase 4, when funding was received from the Australian Government's  
8  
9 4 NHMRC to establish a Centre for Research Excellence and the network's structure and function(12)  
10  
11 5 evolved to that of an 'innovation platform.'(26) Used as a vehicle to stimulate and support multi-  
12  
13 6 stakeholder collaboration and learning, 'innovation platforms' provide a space of interaction to facilitate  
14  
15 7 the development and emergence of innovations when there are complex, system-wide issues requiring  
16  
17 8 coordinated action and collective problem solving. Most extensively applied in international  
18  
19 9 agricultural development, and to a limited extent in health, innovation platforms differ from other  
20  
21 10 networks by the incorporation of a wider network of stakeholders at multiple levels of the system and  
22  
23 11 in different roles; the concept of "sector boundary spanning" that brings in stakeholders from other  
24  
25 12 sectors to assist in developing health care solutions; and application of continuous reflection, learning  
26  
27 13 and adaptation as central design elements.(26, 27)

28  
29 14 These findings support previous literature that researchers tend to collaborate with like-minded others,  
30  
31 15 but that this tendency toward homophily can be disrupted by implementing policies that encourage  
32  
33 16 interdisciplinary collaboration and purposeful research translation – such as was done with the  
34  
35 17 innovation platform.(14) Although the purposeful adjustment to an 'innovation platform' was  
36  
37 18 associated with an expansion of activity among the network and new thematic scope in publications,  
38  
39 19 this acceleration could also reflect other inter-related factors, such as longer-term relationships, and an  
40  
41 20 increase in funding.

42  
43 21 Furthermore, the earlier phases were focused on supporting PHC services to implement and embed  
44  
45 22 quality improvement techniques through participatory action research. Access to the CQI dataset  
46  
47 23 formed the basis of research collaborations between those services and University and Research  
48  
49 24 Institutes to undertake data analyses that resulted in publications up to 2019. Though there were 175  
50  
51 25 PHC services providing data to the research collaboration, only 11 Health Services co-authored  
52  
53 26 publications. While not necessarily co-authors, Health Services made important contributions to  
54  
55 27 implementing research, collecting data, and importantly – to interpretation and analysis of findings.

56  
57 28 Our findings build on a prior social network analysis of partners in the research network which was  
58  
59 29 undertaken as part of an interim evaluation in Phase 3 of the research network. Cunningham and her  
60  
1 30 co-authors(46) found an increase in network density (43% to 59%) from 2013 to 2014, indicating an  
2 31 increase over time in connectivity and communication between partner organisations. A major element  
3 32 in achieving the goals of that phase of research was the network's focus on developing a shared database  
4 33 of de-identified CQI data from Indigenous PHC centres.(46) The importance to the research network of  
5 34 collecting and sharing data is supported by the experiences of other research collaborations.(47, 48)  
6 35 Furthermore, the high level of trust identified across the network is indicative of a properly functioning



1  
2  
3 1 collaboration.(49) The growth in Phase 4 leveraged the high level of trust already established. The  
4 2 decreasing degree of centralisation scores are consistent with findings reported by Cunningham et  
5 3 al.(46), and reflect the shift towards more organisations taking a greater role in publishing. Increasing  
6 4 the number of diverse collaborations and creating a more decentralised network has been shown to  
7 5 improve productivity and increase the potential for high-impact science.(50)

8 6 Equity and capacity strengthening are promoted as core elements of research networks.(12, 51) The  
9 7 research network, particularly when operating as an innovation platform, made some progress in  
10 8 addressing concerns about the imbalances between Indigenous and non-Indigenous authors when  
11 9 writing about Indigenous issues. However, despite an increased number of publications with Indigenous  
12 10 authors, especially in Phase 4, there remains a paucity of Indigenous first or senior/last authors. Further  
13 11 work is needed to redress the inequities these imbalances represent, a concern echoed in global health  
14 12 literature.(52) The latest iteration of the research network was recently launched with funding for a new  
15 13 Centre for Research Excellence in Strengthening Systems for Indigenous Health Care Equity (2020–  
16 14 2024) (CRE-STRIDE) (NHMRC Grant Id #1170882). This Centre marks the beginning of a new  
17 15 Indigenous leadership structure for the research network with more than half of the research  
18 16 investigators, including the Chief Investigator, identifying as Indigenous. It also aims to extend and  
19 17 further support the use of CQI methods in sectors with responsibility for addressing social and cultural  
20 18 determinants of health and to enhance community participation in CQI processes.(28)

## 21 19 **Strengths and limitations of the study**

22 20 A study strength was the long timeframe of 18 years of publications. Although co-authorship is only  
23 21 one indicator of collaboration, there are several advantages to relying on it as a proxy for assessing the  
24 22 level of research collaboration, including its verifiability, stability over time, availability of data in the  
25 23 public domain and ease of measurement.(11)

26 24 As the aim of the study was to assess growth and change in the research collaboration over time, we  
27 25 applied an unweighted method to the network analysis. This approach was chosen for a number of  
28 26 reasons. Firstly, the interpretability would be compromised by weighting edges, in the context of the  
29 27 questions we wished to answer. We moved all of the information that would have otherwise been  
30 28 embedded into a weight to separate descriptive analyses available in Table 3. Secondly, given the  
31 29 temporal nature of collaborations we did not wish to make erroneous assumptions that quantity of  
32 30 publications is a substitute for quality. For example, it is difficult to compare a collaboration that  
33 31 generates only one high impact publication to a collaboration that may produce a larger number of lower  
34 32 impact publications. Weighting by publication numbers could therefore introduce a bias that may lead  
35 33 to erroneous interpretation of the findings.

1  
2  
3 1 Limitations of this study include: 1) many collaborative efforts are not reflected in co-authorship  
4 2 metrics. We are undertaking other studies to address this as part of the overall evaluation of the CRE-  
5 3 IQI. Other measures of collaborative ties include having co-investigators on submitted or funded grants,  
6 4 on conference presentations and as authors of grey literature, all of which may be useful to broaden the  
7 5 definition of collaboration in our innovation platform. However, we assumed that, in most cases, co-  
8 6 authorship indicates an active cooperation between partners beyond the simple exchange of material or  
9 7 information. 2) This analysis does not capture the collaborations that continue to occur through co-  
10 8 authorship or other means that are not necessarily related to the research network. For example, a  
11 9 collaboration formed by co-authoring on a CRE-IQI manuscript might lead to collaboration on other  
12 10 projects and research not reflected in this analysis. 3) Because there is a substantial lead-time for an  
13 11 academic publication, a writing collaboration that might have commenced in an earlier phase of work  
14 12 may not have been published until a later phase. Thus publication in one phase can arise from substantial  
15 13 work in a previous phase. 4) Although multiple authorship affiliations are increasingly recognised as  
16 14 facilitating knowledge exchange and becoming more widespread,(53) our analysis does not include the  
17 15 multiple affiliations of many of the authors and so may under-report the level of collaboration.  
18 16 Similarly, only representing the University affiliation, and not the actual Department in which an author  
19 17 works, obscures collaboration between Departments in the same University. 5) Three of the eleven  
20 18 authors on this manuscript (RSB, JB and VM) had published more than 20 manuscripts included in this  
21 19 analysis, and RSB was the Chief Investigator on the research network during this period. Given this,  
22 20 and to mitigate against bias, BAP who has not published as part of this network undertook the network  
23 21 analysis and a blind review process for categorising the manuscripts, with discrepancies discussed.

22 22 To the best of our knowledge, this study is the first to describe a CQI research network using co-  
23 23 authorship network analysis. While the generalisability of the findings may be limited to similar  
24 24 networks, the methodological approach could readily be transferred. In this study we did not set out to  
25 25 demonstrate a link between an expansion of the collaboration and engagement with impact or  
26 26 improvement in the quality of care. However, it is widely recognised in the literature, that increasing  
27 27 collaboration and engagement across health services, researchers and policy makers is a critically  
28 28 important element along the causal change pathway to improving the quality of care and achieving  
29 29 impact. Methods such as co-authorship analysis are useful for demonstrating a pathway to research  
30 30 impact related to engagement, which traditionally tends to rely on the quantity of outputs rather than on  
31 31 the strengthening of networks and the scope of work undertaken.

## 32 CONCLUSION

33 33 Over the 18-year timeframe, collaboration in publications increased with network consolidation and  
34 34 expansion. Publication outputs accelerated in the final phase, coinciding with a broader thematic focus



1  
2  
3 1 and an increase in the number and diversity of participating organisations. This expansion occurred  
4 2 largely due to the cumulative effect of building trust and relationships over time, including the  
5 3 development of a comprehensive dataset for use by all stakeholders. The findings highlight the benefits  
6 4 of long-term relationship building among diverse partners to support participatory research in quality  
7 5 improvement. Increased productivity was associated with increased authorship diversity and a  
8 6 decentralised network, suggesting these may be important factors in enhancing research impact and  
9 7 advancing the knowledge and practice of CQI in primary health care. Despite improvements, further  
10 8 work is needed to address inequities in female authorship and Indigenous authorship. The co-authorship  
11 9 analysis has been useful for demonstrating research impacts related to collaboration, which are not well  
12 10 captured by metrics such as quantity of outputs.  
13  
14  
15  
16  
17  
18  
19  
20  
21  
22  
23  
24  
25  
26  
27  
28  
29  
30  
31  
32  
33  
34  
35  
36  
37  
38  
39  
40  
41  
42  
43  
44  
45  
46  
47  
48  
49  
50  
51  
52  
53  
54  
55  
56  
57  
58  
59  
60

1  
2  
3 **1 Declarations**  
4

5 **2 Ethics approval:** University of Sydney Human Research Ethics Committee (Project 2018/206) and the  
6 Human Research Ethics Committee of the Northern Territory Department of Health and Menzies  
7 School of Health Research (Project 2018-3105).  
8  
9

10 **5 Consent for publication:** Not applicable  
11  
12

13 **6 Availability of data and material:** The data set is available from the corresponding author on  
14 reasonable request and if consistent with the projects' ethics approvals.  
15  
16

17 **8 Competing interests:** The authors declare that this research was conducted in the absence of any  
18 commercial or financial relationships that could be construed as a potential conflict of interest.  
19

20 **10 Funding:** The National Health and Medical Research Council ([www.nhmrc.gov.au](http://www.nhmrc.gov.au)) funded the Centre  
21 for Research Excellence in Integrated Quality Improvement (#1078927). In-kind support has been  
22 provided by a range of community-controlled and government agencies.  
23  
24  
25

26 **13 Author's information:** RSB was the Chief Investigator of the research network from 2002 – 2019.  
27 RSB, JB, VM, AL, FCC, RGB, and AL had published 5 or more publications as part of this research  
28 network. RGB and VM are both Indigenous researchers: RGB is from the Gungarri/Kunja nations in  
29 South-Western Queensland and VM from the Quandamooka community on North Stradbroke Island,  
30 Queensland. JB, BAP, RSB, DP, AL, SA, KPC, MEP and FCC are non-Indigenous researchers. All  
31 authors have a long-standing commitment to improving health outcomes for Aboriginal and Torres  
32 Strait Islander people.  
33  
34  
35  
36  
37

38 **20 Acknowledgements:** The development of this manuscript would not have been possible without the  
39 active support, enthusiasm and commitment of staff in participating primary health care services, and  
40 members of the research collaboration various phases of the research collaboration. We would like to  
41 acknowledge the Centre for Research Excellence in Integrated Quality Improvement (CRE-IQI)  
42 evaluation working group for its role in guiding the implementation of the multi-pronged evaluation of  
43 the CRE-IQI: Jodie Bailie, Roxanne Bainbridge, Ross Bailie, Alison Laycock, Boyd Potts, Shanthi  
44 Ramanathan, Andrew Searles, Frances Cunningham and Chris Doran. We would like to thank Kerryn  
45 Harkin for compiling and maintaining project records, and for organising workshops and meetings,  
46 Frances Cunningham for her contributions to the application of the network methodology, Dan  
47 Chamberlain for his expert review of the methodology, Svetlana Andrienko for the reproduction of  
48 images, and Jane Yule for her editing and proofreading support.  
49  
50  
51  
52  
53  
54  
55

56 **31 Authors' contributions:**  
57

58 **32** Conceptualization: JB, BAP, RSB.

59 **33** Data curation: JB, BAP, RSB.  
60

1  
2  
3 1 Formal analysis: JB, BAP.  
4 2 Data interpretation: JB, BAP, AL, SA, RSB, FCC, VM, RGB, KPC, MEP, DP  
5 3 Funding acquisition: JB, RSB.  
6 4 Methodology: JB, BAP, FCC, RSB.  
7 5 Project administration: JB  
8 6 Supervision: DP, FCC.  
9 7 Visualization: BAP, JB.  
10 8 Writing – original draft: JB, BAP.  
11 9 Writing – critical intellectual input & editing: JB, BAP, AL, SA, RSB, FCC, VM, RGB, KPC, MEP,  
12 10 DP.  
13  
14  
15  
16  
17  
18  
19  
20  
21  
22  
23  
24  
25  
26  
27  
28  
29  
30  
31  
32  
33  
34  
35  
36  
37  
38  
39  
40  
41  
42  
43  
44  
45  
46  
47  
48  
49  
50  
51  
52  
53  
54  
55  
56  
57  
58  
59  
60

11

## 12 REFERENCES

- 13 1. Bailie R, Matthews V, Larkins S, et al. Impact of policy support on uptake of evidence-based  
14 continuous quality improvement activities and the quality of care for Indigenous Australians: a  
15 comparative case study. *BMJ Open*. 2017;7(10):e016626.
- 16 2. Sibthorpe B, Gardner K, Chan M, Dowden M, Sargent G, McAullay D. Impacts of continuous  
17 quality improvement in Aboriginal and Torres Strait Islander primary health care in Australia: A  
18 scoping systematic review. *J Health Organ Manag*. 2018;32(4):545-571.doi10.1108/JHOM-02-2018-  
19 0056.
- 20 3. Taylor MJ, McNicholas C, Nicolay C, et al. Systematic review of the application of the plan–  
21 do–study–act method to improve quality in healthcare. *BMJ Qual Saf*. 2014;23(4):290-8.  
22 doi:10.1136/bmjqs-2013-001862
- 23 4. O'Neill SM, Hempel S, Lim YW, et al. Identifying continuous quality improvement  
24 publications: what makes an improvement intervention 'CQI'? *BMJ Qual Saf*. 2011;20(12):1011-1019.  
25 doi:10.1136/bmjqs.2010.050880
- 26 5. Matthews V, Schierhout G, McBroom J, et al. Duration of participation in continuous quality  
27 improvement: a key factor explaining improved delivery of Type 2 diabetes services. *BMC Health Serv*  
28 *Res*. 2014;14:578.doi:10.1186/s12913-014-0578-1
- 29 6. Bailie R, Matthews V, Brands J, et al. A systems-based partnership learning model for  
30 strengthening primary healthcare. *Implement Sci*. 2013;8(1):143. doi:10.1186/1748-5908-8-143
- 31 7. Dixon-Woods M. How to improve healthcare improvement—an essay by Mary Dixon-Woods.  
32 *BMJ*. 2019;367:l5514. doi:10.1136/bmj.l5514
- 33 8. Oliver K, Kothari A, Mays N. The dark side of coproduction: do the costs outweigh the benefits  
34 for health research? *Health Res Policy Syst*. 2019;17(1):33.doi:10.1186/s12961-019-0432-3
- 35 9. Holbrook JA, Wixted B, Lewis BS, et al. The Structure and Construction of Formal Research  
36 Networks: A Policy Oriented Understanding of Stakeholder Engagement. Simon Fraser  
37 University, Vancouver, BC; 2011.<<http://summit.sfu.ca/item/13636>>, accessed 6<sup>th</sup> May 2020.
- 38 10. Varda DM, Retrum JH. An exploratory analysis of network characteristics and quality of  
39 interactions among public health collaboratives. *J Public Health Res*.  
40 2012;1(2):170-176.doi:10.4081/jphr.2012.e27

- 1 11. Katz JS, Martin BR. What is research collaboration? *Research Policy*. 1997;26(1):1-18.
- 2 12. VanderZanden A, Langlois EV, Ghaffar A, et al. It takes a community: a landscape analysis of  
3 global health research consortia. *BMJ Glob Health*. 2019;4(Suppl 8):e001450.doi:10.1136/bmjgh-  
4 2019-001450
- 5 13. Fonseca BdeP, Sampaio RB, Fonseca MVdA, et al. Co-authorship network analysis in health  
6 research: method and potential use. *Health Res Policy Syst*. 2016;14(1):34.doi:10.1186/s12961-016-  
7 0104-5
- 8 14. Fagan J, Eddens KS, Dolly J, et al. Assessing research collaboration through co-authorship  
9 network analysis. *J Res Adm*. 2018;49(1):76-99.
- 10 15. Newman MEJ. Coauthorship networks and patterns of scientific collaboration. *Proceedings of*  
11 *the National Academy of Sciences*. 2004;101(suppl 1):5200-5.
- 12 16. Schneider EC, Sarnak DO, Squires D, et al. *Mirror Mirror 2017: International Comparison*  
13 *Reflects Flaws and Opportunities for Better U.S. Health Care*. 2017. New York, NY: Commonwealth  
14 Fund. <<https://interactives.commonwealthfund.org/2017/july/mirror-mirror/>>, accessed 6<sup>th</sup> May 2020.
- 15 17. Australian Health Ministers' Advisory Council. *Aboriginal and Torres Strait Islander Health*  
16 *Performance Framework*. Canberra: Department of the Prime Minister and Cabinet; 2017.  
17 <[https://www.niaa.gov.au/resource-centre/indigenous-affairs/health-performance-framework-2017-](https://www.niaa.gov.au/resource-centre/indigenous-affairs/health-performance-framework-2017-report)  
18 [report](https://www.niaa.gov.au/resource-centre/indigenous-affairs/health-performance-framework-2017-report)>, accessed 25<sup>th</sup> May 2020.
- 19 18. Bailie J, Schierhout G, Laycock A, et al. Determinants of access to chronic illness care: a  
20 mixed-methods evaluation of a national multifaceted chronic disease package for Indigenous  
21 Australians. *BMJ Open*. 2015;5(11):e008103.doi:10.1136/bmjopen-2015-008103
- 22 19. Australian Indigenous HealthInfoNet. *Overview of Aboriginal and Torres Strait Islander health*  
23 *status 2019*. Perth: Australian Indigenous HealthInfoNet ; 2020.  
24 <[https://healthinonet.ecu.edu.au/learn/health-facts/overview-aboriginal-torres-strait-islander-health-](https://healthinonet.ecu.edu.au/learn/health-facts/overview-aboriginal-torres-strait-islander-health-status/)  
25 [status](https://healthinonet.ecu.edu.au/learn/health-facts/overview-aboriginal-torres-strait-islander-health-status/)>.,accessed 25<sup>th</sup> May 2020.
- 26 20. Durey A, Thompson SC. Reducing the health disparities of Indigenous Australians: time to  
27 change focus. *BMC Health Serv Res*. 2012;12:151.doi:10.1186/1472-6963-12-151
- 28 21. Shortell SM, Bennett CL, Byck GR. Assessing the impact of continuous quality improvement  
29 on clinical practice: what it will take to accelerate progress. *Milbank Q*. 1998;76(4):593-510.  
30 doi:10.1111/1468-0009.00107
- 31 22. Bailie R, Si D, Shannon C, et al. Study protocol: national research partnership to improve  
32 primary health care performance and outcomes for Indigenous peoples. *BMC Health Serv Res*.  
33 2010;10:129.doi:10.1186/1472-6963-10-129
- 34 23. Hayward MN, Mequanint S, Paquette-Warren J, et al. The FORGE AHEAD clinical readiness  
35 consultation tool: a validated tool to assess clinical readiness for chronic disease care mobilization in  
36 Canada's First Nations. *BMC Health Serv Res*. 2017;17(1):233.doi:10.1186/s12913-017-2175-6
- 37 24. Bailie RS, Si D, Togni SJ, et al. A multifaceted health-service intervention in remote Aboriginal  
38 communities: 3-year follow-up of the impact on diabetes care. *Med J Aust*. 2004;181(4):195-200.
- 39 25. Bailie R, Si D, Connors C, et al. Study protocol: audit and best practice for chronic disease  
40 extension (ABCDE) project. *BMC Health Serv Res*. 2008;8:184.doi:10.1186/1472-6963-8-184
- 41 26. Bailie J, Cunningham FC, Bainbridge RG, et al. Comparing and contrasting 'innovation  
42 platforms' with other forms of professional networks for strengthening primary healthcare systems for

- 1  
2  
3 1 Indigenous Australians. *BMJ Glob Health*.2018;3(3):e000683corr1.doi:10.1136/bmjgh-2017-  
4 2 000683corr1  
5  
6 3 27. Bailie J, Laycock AF, Peiris D, et al. Using developmental evaluation to enhance continuous  
7 4 reflection, learning and adaptation of an innovation platform in Australian Indigenous primary  
8 5 healthcare. *Health Res Policy Syst*. 2020;18(1):45.doi:10.1186/s12961-020-00562-4  
9  
10 6 28. Laycock A, Conte K, Harkin K, et al. *Improving the Quality of Primary Health Care for*  
11 7 *Aboriginal and Torres Strait Islander Australians. Centre for Research Excellence in Integrated*  
12 8 *Quality Improvement 2015–2019: Messages for Action, Impact and Research*. Lismore NSW:  
13 9 University Centre for Rural Health, The University of Sydney; 2019. <[https://ucrhc.edu.au/cre-iqui-](https://ucrhc.edu.au/cre-iqui-resources/)  
14 10 [resources/](https://ucrhc.edu.au/cre-iqui-resources/)>, accessed 25 May 2020.  
15  
16 11 29. Bailie RS, Togni SJ, Si D, Robinson G, et al. Preventive medical care in remote Aboriginal  
17 12 communities in the Northern Territory: a follow-up study of the impact of clinical guidelines,  
18 13 computerised recall and reminder systems, and audit and feedback. *BMC Health Serv Res*.  
19 14 2003;3(1):15.doi:10.1186/1472-6963-3-15  
20  
21 15 30. Cunningham FC, Ferguson-Hill S, Matthews V, et al. Leveraging quality improvement through  
22 16 use of the Systems Assessment Tool in Indigenous primary health care services: a mixed methods study.  
23 17 *BMC Health Serv Res*. 2016;16(1):583.doi:10.1186/s12913-016-1810-y  
24  
25 18 31. Bailie J, Schierhout G, Cunningham F, Yule J, Laycock A, Bailie R. *Quality of primary health*  
26 19 *care for Aboriginal and Torres Strait Islander people in Australia: Key research findings and messages*  
27 20 *for action from the ABCD National Research Partnership*. Menzies School of Health Research. May  
28 21 2015. <<https://apo.org.au/node/55532>>, accessed 25<sup>th</sup> May 2020.  
29  
30 22 32. McPhail-Bell K, Matthews V, Bainbridge R, et al. An "All Teach, All Learn" approach to  
31 23 research capacity strengthening in Indigenous primary health care continuous quality improvement.  
32 24 *Front Public Health*. 2018;6:107.doi:10.3389/fpubh.2018.00107  
33  
34 25 33. Schierhout G, Brands J, Bailie R. *Audit and Best Practice for Chronic Disease Extension*  
35 26 *Project, 2005–2009: Final Report*. The Lowitja Institute, Melbourne.  
36 27 2010.<[https://www.lowitja.org.au/content/Document/ABCDE\\_Report2011.pdf](https://www.lowitja.org.au/content/Document/ABCDE_Report2011.pdf)>, accessed 25<sup>th</sup> May  
37 28 2020  
38  
39 29 34. McCalman J, Bailie R, Bainbridge R, et al. Continuous quality improvement and  
40 30 comprehensive primary health care: A systems framework to improve service quality and health  
41 31 outcomes. *Front Public Health*. 2018;6:76.doi:10.3389/fpubh.2018.00076  
42  
43 32 35. Bailie J, Laycock A, Matthews V, et al. System-level action required for wide-scale  
44 33 improvement in quality of primary health care: Synthesis of feedback from an interactive process to  
45 34 promote dissemination and use of aggregated quality of care data. *Front Public Health*. 2016;4:86.  
46 35 doi:10.3389/fpubh.2016.00086  
47  
48 36 36. Bailie J, Matthews V, Laycock A, et al. Rigorous follow-up systems for abnormal results are  
49 37 essential to improve health outcomes for Aboriginal and Torres Strait Islander people. *Aust J Prim*  
50 38 *Health*. 2018;24(1):1-3.doi:10.1071/PY17103  
51  
52 39 37. Laycock A, Bailie J, Matthews V, Bailie R. Interactive dissemination: engaging stakeholders  
53 40 in the use of aggregated quality improvement data for system-wide change in Australian Indigenous  
54 41 primary health care. *Front Public Health*. 2016;4:84.  
55  
56 42 38. *Python Language Reference*. Python Software Foundation, <<http://www.python.org>>,  
57 43 accessed 25<sup>th</sup> May 2020  
58  
59  
60



- 1  
2  
3 1 39. Kluyver T, Ragan-Kelley B, Pérez F, et al. Jupyter Notebooks-a publishing format for  
4 2 reproducible computational workflows. *ELPUB*; 2016.pp.87-90.
- 5  
6 3 40. *Anaconda Software Distribution*. Anaconda 2016. <<https://anaconda.com>>, accessed 25<sup>th</sup> May  
7 4 2020
- 8  
9 5 41. Hagberg A, Swart P, S Chult D. *Exploring network structure, dynamics, and function using*  
10 6 *NetworkX*. Los Alamos National Lab.(LANL), Los Alamos, NM (United States); 2008.
- 11  
12 7 42. Bastian M, Heymann S, Jacomy M, editors. Gephi: an open source software for exploring and  
13 8 manipulating networks. *Third International AAAI Conference on Weblogs and Social Media*;2009.
- 14  
15 9 43. Borgatti SP, Everett MG. Models of core/periphery structures. *Social Networks*.  
16 10 2000;21(4):375-95.
- 17  
18 11 44. Kojaku S, Masuda N. A generalised significance test for individual communities in networks.  
19 12 *Sci Rep*. 2018;8(1):7351.doi:10.1038/s41598-018-25560-z
- 20  
21 13 45. Aarons GA, Sklar M, Mustanski B, et al. “Scaling-out” evidence-based interventions to new  
22 14 populations or new health care delivery systems. *Implement Sci*.017;12(1):111.doi:10.1186/s13012-  
23 15 017-0640-6
- 24  
25 16 46. Cunningham FC, Matthews V, Sheahan A, et al. Assessing Collaboration in a National  
26 17 Research Partnership in Quality Improvement in Indigenous Primary Health Care: A Network  
27 18 Approach. *Front Public Health*. 2018;6:182.doi:10.3389/fpubh.2018.00182
- 28  
29 19 47. Aveling EL, Martin G, Armstrong N, et al. Quality improvement through clinical communities:  
30 20 eight lessons for practice. *Journal of health organization and management*. 2012. *J Health Organ*  
31 21 *Manag*. 2012;26(2):158-174.doi:10.1108/14777261211230754
- 32  
33 22 48. Perrino T, Howe G, Sperling A, Beardslee W, Sandler I, Shern D, et al. Advancing Science  
34 23 Through Collaborative Data Sharing and Synthesis. *Perspect Psychol Sci*. 2013;8(4):433-444.  
35 24 doi:10.1177/1745691613491579
- 36  
37 25 49. Mattessich P, Johnson K. *Collaboration: What Makes it Work. A Review of Research Literature*  
38 26 *on factors Influencing Successful Collaborations*. 3rd Edition ed. New York: Fieldstone Alliance; 2018.
- 39  
40 27 50. Yousefi-Nooraie R, Akbari-Kamrani M, Hanneman RA, Etemadi A. Association between co-  
41 28 authorship network and scientific productivity and impact indicators in academic medical research  
42 29 centers: A case study in Iran. *Health Res Policy Syst*. 2008;6:9.doi:10.1186/1478-4505-6-9
- 43  
44 30 51. Parker M, Kingori P. Good and bad research collaborations: researchers’ views on science and  
45 31 ethics in global health research. *PLoS One*. 2016;11(10):e0163579.doi:10.1371/journal.pone.0163579
- 46  
47 32 52. Abimbola S. The foreign gaze: authorship in academic global health. *BMJ Glob Health*.  
48 33 2019;4(5):e002068.doi:10.1136/bmjgh-2019-002068
- 49  
50 34 53. Hottenrott H, Lawson C. A first look at multiple institutional affiliations: a study of authors in  
51 35 Germany, Japan and the UK. *Scientometrics*. 2017;111(1):285-295.doi:10.1007/s11192-017-2257-6
- 52  
53 36  
54 37  
55 38  
56 39  
57  
58  
59  
60

1  
2  
3  
4  
5  
6  
7  
8  
9  
10  
11  
12  
13  
14  
15  
16  
17  
18  
19  
20  
21  
22  
23  
24  
25  
26  
27  
28  
29  
30  
31  
32  
33  
34  
35  
36  
37  
38  
39  
40  
41  
42  
43  
44  
45  
46  
47  
48  
49  
50  
51  
52  
53  
54  
55  
56  
57  
58  
59  
60

1

2

For peer review only

Phase 1 2002–2004

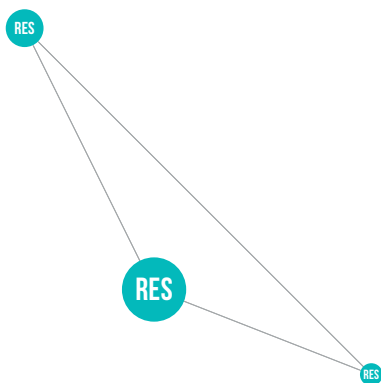

Phase 2 2005–2009

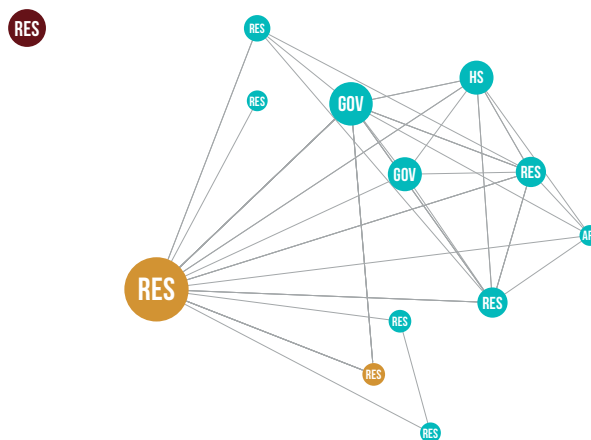

Phase 3 2010–2014

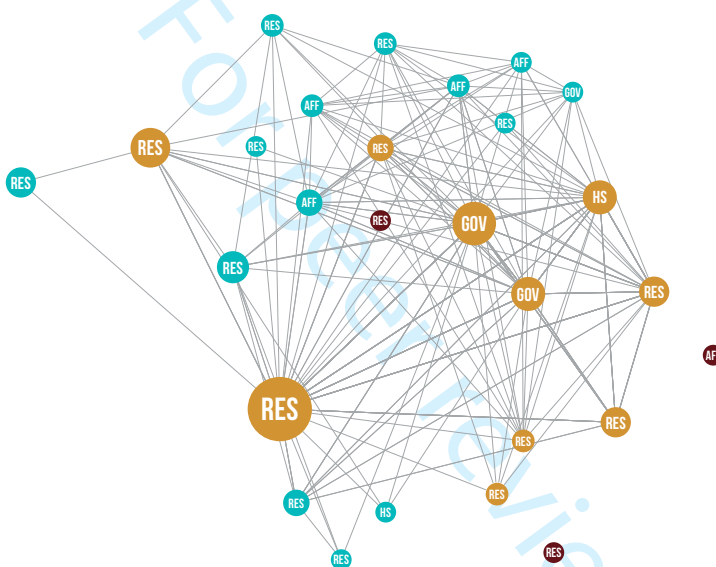

- RES** University or Research Institute
- HS** Health Service
- GOV** Government Department
- AFF** Affiliate
- NGO** Non-Government Organisation
- PHN** Primary Health Network
- New to network
- Left network
- Existing or former member

Phase 4 2015–2019

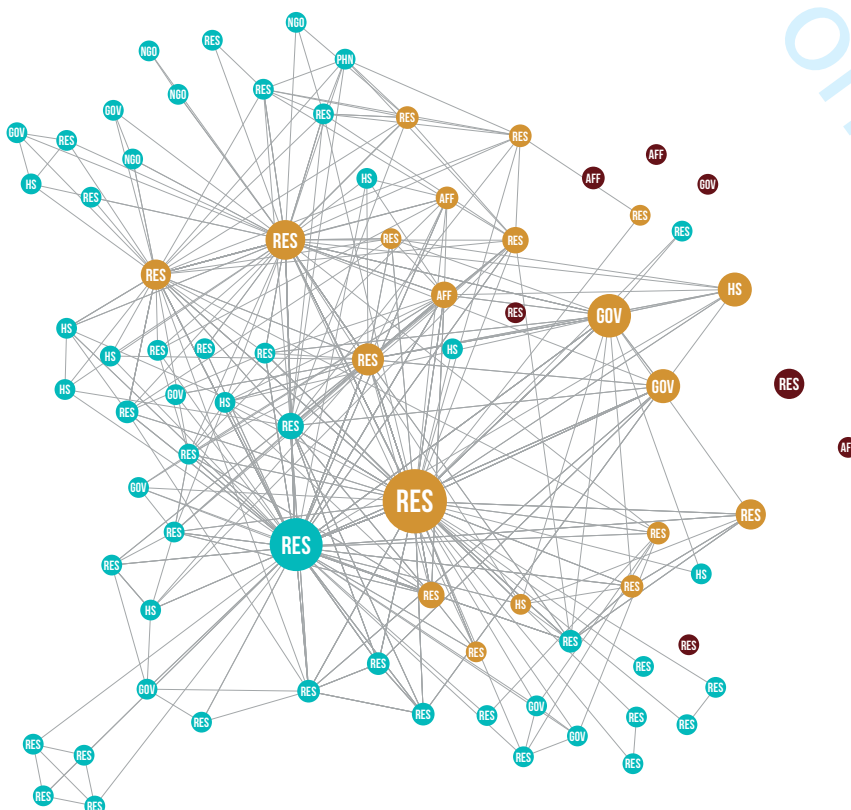





1  
2  
3 **SUPPLEMENTARY FILE 1**  
4

5 *Table S1: Total number of publications, per author, for those who have published 5 or more as part of*  
6 *the research collaboration, 2002–2019*  
7  
8

9  
10  
11  
12  
13  
14  
15  
16  
17  
18  
19  
20  
21  
22  
23  
24  
25  
26  
27  
28  
29  
30  
31  
32  
33  
34  
35  
36  
37  
38  
39  
40  
41  
42  
43  
44  
45  
46  
47  
48  
49  
50  
51  
52  
53  
54  
55  
56  
57  
58  
59  
60

| Author name (last_first)  | Total number of publications |
|---------------------------|------------------------------|
| Bailie_Ross               | 97                           |
| Matthews_Veronica         | 36                           |
| Thompson_Sandra           | 21                           |
| Tsey_Komla                | 21                           |
| Bailie_Jodie              | 21                           |
| Si_Damin                  | 20                           |
| Connors_Christine         | 20                           |
| Dowden_Michelle           | 17                           |
| O'Donoghue_Lynette        | 15                           |
| Weeramanthri_Tarun        | 14                           |
| Larkins_Sarah             | 13                           |
| Kennedy_Catherine         | 12                           |
| Schierhout_Gill           | 12                           |
| Cunningham_Frances        | 12                           |
| Clelland (Percival)_Nikki | 11                           |
| Laycock_Alison            | 11                           |
| Kwedza_Ru                 | 10                           |
| Bainbridge_Roxanne        | 10                           |
| Cox_Rhonda                | 9                            |
| Brown_Alex                | 9                            |
| McCalman_Janya            | 9                            |
| Robinson_Gary             | 8                            |
| Liddle_Helen              | 8                            |
| Burke_Hugh                | 8                            |
| Rumbold_Alice             | 7                            |
| Boyle_Jacqueline          | 7                            |
| Gardner_Karen             | 6                            |
| Ralph_Anna                | 6                            |
| Burgess_Paul              | 6                            |
| Nagel_Tricia              | 5                            |
| Moore_Elizabeth           | 5                            |

|                   |   |
|-------------------|---|
| Doran_Chris       | 5 |
| Garvey_Gail       | 5 |
| Valery_Patricia   | 5 |
| Kinchin_Irina     | 5 |
| McAullay_Dan      | 5 |
| McAuley_Kimberley | 5 |
| Strobel_Natalie   | 5 |
| Edmond_Karen      | 5 |
| Onnis_Leigh-Ann   | 5 |

For peer review only

## SUPPLEMENTARY FILE 2

Table S1: Publications included in the analysis, phase and research theme allocation, 2002–2019

|                                                                                                                                                                                                                                                                                          | Phases of research collaboration |                      |                      |                      | Categories of research themes |                                                                     |                                  |
|------------------------------------------------------------------------------------------------------------------------------------------------------------------------------------------------------------------------------------------------------------------------------------------|----------------------------------|----------------------|----------------------|----------------------|-------------------------------|---------------------------------------------------------------------|----------------------------------|
|                                                                                                                                                                                                                                                                                          | Phase 1: 2002 – 2004             | Phase 2: 2005 – 2009 | Phase 3: 2010 – 2014 | Phase 4: 2015 – 2019 | CQI in PHC Clinical care      | CQI activities in social, environmental or behavioural determinants | Processes and approaches for CQI |
| Bailie RS, Togni SJ, Si D, et al. Preventive medical care in remote Aboriginal communities in the Northern Territory: a follow-up study of the impact of clinical guidelines, computerised recall and reminder systems, and audit and feedback. <i>BMC Health Serv Res</i> 2003;3(1):15. | 1                                |                      |                      |                      | 1                             |                                                                     |                                  |
| Bailie RS, Si D, Togni SJ, et al. A multifaceted health-service intervention in remote Aboriginal communities: 3-year follow-up of the impact on diabetes care. <i>MJA</i> 2004;181(4):195–200.                                                                                          | 1                                |                      |                      |                      | 1                             |                                                                     |                                  |
| Si D, Bailie R, Connors C, et al. Assessing health centre systems for guiding improvement in diabetes care. <i>BMC Health Serv Res</i> 2005;5(1):56.                                                                                                                                     |                                  | 1                    |                      |                      | 1                             |                                                                     |                                  |
| Wayte KJ, Bailie RS, Stephenson P. Improving the feedback of housing information to Indigenous communities. <i>Environmental Health</i> 2005;5(2):36.                                                                                                                                    |                                  | 1                    |                      |                      |                               | 1                                                                   |                                  |
| Bailie RS, Wayte KJ. A continuous quality improvement approach to Indigenous housing and health. <i>Environmental Health</i> 2006;6(2):36–41.                                                                                                                                            |                                  | 1                    |                      |                      |                               | 1                                                                   |                                  |
| Bailie RS, Robinson G, Kondalsamy-Chennakesavan SN, et al. Investigating the sustainability of outcomes in a chronic disease treatment programme. <i>Soc Sci Med</i> 2006;63(6):1661–70.                                                                                                 |                                  | 1                    |                      |                      | 1                             |                                                                     |                                  |
| Bailie R, Si D, Dowden M, et al. Improving organisational systems for diabetes care in Australian Indigenous communities. <i>BMC Health Serv Res</i> 2007;7(1):67.                                                                                                                       |                                  | 1                    |                      |                      | 1                             |                                                                     |                                  |
| Bailie RS, Si D, O'Donoghue L, et al. Indigenous health: effective and sustainable health services through continuous quality improvement. <i>MJA</i> 2007;186(10):525–7.                                                                                                                |                                  | 1                    |                      |                      |                               |                                                                     | 1                                |
| Si D, Bailie RS, Dowden M, et al. Delivery of preventive health services to Indigenous adults: response to a systems-oriented primary care quality improvement intervention. <i>MJA</i> 2007;187(8):453–7.                                                                               |                                  | 1                    |                      |                      | 1                             |                                                                     |                                  |

1  
2  
3  
4  
5  
6  
7  
8  
9  
10  
11  
12  
13  
14  
15  
16  
17  
18  
19  
20  
21  
22  
23  
24  
25  
26  
27  
28  
29  
30  
31  
32  
33  
34  
35  
36  
37  
38  
39  
40  
41  
42  
43  
44  
45  
46

|                                                                                                                                                                                                                                                                        |  |   |   |  |   |   |   |
|------------------------------------------------------------------------------------------------------------------------------------------------------------------------------------------------------------------------------------------------------------------------|--|---|---|--|---|---|---|
| McDonald EL, Bailie RS, Rumbold AR, et al. Preventing growth faltering among Australian Indigenous children: implications for policy and practice. <i>MJA</i> 2008;188:S84–S6.                                                                                         |  | 1 |   |  |   |   | 1 |
| Bailie RS, Si D, Dowden MC, et al. Delivery of child health services in Indigenous communities: implications for the federal government's emergency intervention in the Northern Territory. <i>MJA</i> . 2008;188(10):615–8.                                           |  | 1 |   |  | 1 |   |   |
| Si D, Bailie R, Cunningham J, et al. Describing and analysing primary health care system support for chronic illness care in Indigenous communities in Australia's Northern Territory – use of the Chronic Care Model. <i>BMC Health Serv Res</i> 2008;8(1):112.       |  | 1 |   |  |   |   | 1 |
| Bailie R, Sibthorpe B, Gardner K, et al. Quality improvement in Indigenous primary health care: history, current initiatives and future directors. <i>Aust J Prim Health</i> 2008;14(2):53–7.                                                                          |  | 1 |   |  |   |   | 1 |
| Bailie R, Si D, Connors C, et al. Study protocol: audit and best practice for chronic disease extension (ABCDE) project. <i>BMC Health Serv Res</i> 2008;8(1):184.                                                                                                     |  | 1 |   |  |   |   | 1 |
| Si D, Bailie R, Weeramanthri T. Effectiveness of chronic care model-oriented interventions to improve quality of diabetes care: a systematic review. <i>Prim Health Care Res Dev</i> 2008;9(1):25–40.                                                                  |  | 1 |   |  |   |   | 1 |
| Bailie RS, Si D, Dowden MC, et al. A systems approach to improving timeliness of immunisation. <i>Vaccine</i> 2009;27(27):3669–74.                                                                                                                                     |  | 1 |   |  | 1 |   |   |
| Baeza J, Bailie R, Lewis JM. Care for chronic conditions for indigenous Australians: key informants' perspectives on policy. <i>Health Policy</i> 2009;92(2–3):211–7.                                                                                                  |  | 1 |   |  |   |   | 1 |
| Si D, Bailie R, Dowden M, et al. Assessing quality of diabetes care and its variation in Aboriginal community health centres in Australia. <i>Diabetes/Metabolism Research and Reviews</i> 2010;26(6):464–73.                                                          |  |   | 1 |  | 1 |   |   |
| McDonald E, Bailie R, Grace J, et al. An ecological approach to health promotion in remote Australian Aboriginal communities. <i>Health Promot Int</i> 2010;25(1):42–53.                                                                                               |  |   | 1 |  |   | 1 |   |
| Rumbold AR, Bailie RS, Si D, et al. Assessing the quality of maternal health care in Indigenous primary care services. <i>MJA</i> 2010;192(10):597.                                                                                                                    |  |   | 1 |  | 1 |   |   |
| Si D, Bailie R, Wang Z, Weeramanthri T. Comparison of diabetes management in five countries for general and indigenous populations: an internet-based review. <i>BMC Health Serv Res</i> 2010;10(1):169.                                                               |  |   | 1 |  |   |   | 1 |
| Gardner KL, Dowden M, Togni S, Bailie R. Understanding uptake of continuous quality improvement in Indigenous primary health care: lessons from a multi-site case study of the Audit and Best Practice for Chronic Disease project. <i>Implement Sci</i> 2010;5(1):21. |  |   | 1 |  |   |   | 1 |

|    |                                                                                                                                                                                                                                                                                                                                   |  |  |   |  |   |   |
|----|-----------------------------------------------------------------------------------------------------------------------------------------------------------------------------------------------------------------------------------------------------------------------------------------------------------------------------------|--|--|---|--|---|---|
| 1  | Bailie R, Si D, Shannon C, Semmens J, et al. Study protocol: national research partnership to improve primary health care performance and outcomes for Indigenous peoples. <i>BMC Health Serv Res</i> 2010;10(1):129.                                                                                                             |  |  | 1 |  |   | 1 |
| 2  |                                                                                                                                                                                                                                                                                                                                   |  |  |   |  |   |   |
| 3  | Gardner K, Bailie R, Si D, et al. Reorienting primary health care for addressing chronic conditions in remote Australia and the South Pacific: review of evidence and lessons from an innovative quality improvement process. <i>Aust J Rural Health</i> 2011;19(3):111–7.                                                        |  |  | 1 |  |   | 1 |
| 4  |                                                                                                                                                                                                                                                                                                                                   |  |  |   |  |   |   |
| 5  | Rumbold AR, Bailie RS, Si D, et al. Delivery of maternal health care in Indigenous primary care services: baseline data for an ongoing quality improvement initiative. <i>BMC Pregnancy Childbirth</i> 2011;11(1):16.                                                                                                             |  |  | 1 |  | 1 |   |
| 6  |                                                                                                                                                                                                                                                                                                                                   |  |  |   |  |   |   |
| 7  | Bailie RS, Si D, Connors CM, et al. Variation in quality of preventive care for well adults in Indigenous community health centres in Australia. <i>BMC Health Serv Res</i> 2011;11(1):139.                                                                                                                                       |  |  | 1 |  | 1 |   |
| 8  |                                                                                                                                                                                                                                                                                                                                   |  |  |   |  |   |   |
| 9  | Si D, Dowden M, Kennedy C, Cox R, et al. Indigenous community care: documented depression in patients with diabetes. <i>Aust Fam Physician</i> 2011;40(5):331.                                                                                                                                                                    |  |  | 1 |  | 1 |   |
| 10 |                                                                                                                                                                                                                                                                                                                                   |  |  |   |  |   |   |
| 11 | Gausia K, Thompson S, Nagel T, et al. Antenatal emotional wellbeing screening in Aboriginal and Torres Strait Islander primary health care services in Australia. <i>Contemp Nurse</i> 2013;46(1):73–82.                                                                                                                          |  |  | 1 |  | 1 |   |
| 12 |                                                                                                                                                                                                                                                                                                                                   |  |  |   |  |   |   |
| 13 | Ralph AP, Fittock M, Schultz R, et al. Improvement in rheumatic fever and rheumatic heart disease management and prevention using a health centre-based continuous quality improvement approach. <i>BMC Health Serv Res</i> 2013;13(1):525.                                                                                       |  |  | 1 |  | 1 |   |
| 14 |                                                                                                                                                                                                                                                                                                                                   |  |  |   |  |   |   |
| 15 | Bailie R, Matthews V, Brands J, et al. A systems-based partnership learning model for strengthening primary healthcare. <i>Implement Sci</i> 2013;8(1):143.                                                                                                                                                                       |  |  | 1 |  |   | 1 |
| 16 |                                                                                                                                                                                                                                                                                                                                   |  |  |   |  |   |   |
| 17 | Schierhout G, Hains J, Si D, et al. Evaluating the effectiveness of a multifaceted, multilevel continuous quality improvement program in primary health care: developing a realist theory of change. <i>Implement Sci</i> 2013;8(1):119.                                                                                          |  |  | 1 |  |   | 1 |
| 18 |                                                                                                                                                                                                                                                                                                                                   |  |  |   |  |   |   |
| 19 | Schierhout G, Nagel T, Si D, et al. Do competing demands of physical illness in type 2 diabetes influence depression screening, documentation and management in primary care: a cross-sectional analytic study in Aboriginal and Torres Strait Islander primary health care settings. <i>Int J Ment Health Syst</i> 2013;7(1):16. |  |  | 1 |  |   | 1 |
| 20 |                                                                                                                                                                                                                                                                                                                                   |  |  |   |  |   |   |
| 21 | McDonald EL, Bailie R, Michel T. Development and trialling of a tool to support a systems approach to improve social determinants of health in rural and remote Australian communities: the healthy community assessment tool. <i>Int J Equity Health</i> 2013;12(1):15.                                                          |  |  | 1 |  | 1 |   |
| 22 |                                                                                                                                                                                                                                                                                                                                   |  |  |   |  |   |   |
| 23 |                                                                                                                                                                                                                                                                                                                                   |  |  |   |  |   |   |
| 24 |                                                                                                                                                                                                                                                                                                                                   |  |  |   |  |   |   |
| 25 |                                                                                                                                                                                                                                                                                                                                   |  |  |   |  |   |   |
| 26 |                                                                                                                                                                                                                                                                                                                                   |  |  |   |  |   |   |
| 27 |                                                                                                                                                                                                                                                                                                                                   |  |  |   |  |   |   |
| 28 |                                                                                                                                                                                                                                                                                                                                   |  |  |   |  |   |   |
| 29 |                                                                                                                                                                                                                                                                                                                                   |  |  |   |  |   |   |
| 30 |                                                                                                                                                                                                                                                                                                                                   |  |  |   |  |   |   |
| 31 |                                                                                                                                                                                                                                                                                                                                   |  |  |   |  |   |   |
| 32 |                                                                                                                                                                                                                                                                                                                                   |  |  |   |  |   |   |
| 33 |                                                                                                                                                                                                                                                                                                                                   |  |  |   |  |   |   |
| 34 |                                                                                                                                                                                                                                                                                                                                   |  |  |   |  |   |   |
| 35 |                                                                                                                                                                                                                                                                                                                                   |  |  |   |  |   |   |
| 36 |                                                                                                                                                                                                                                                                                                                                   |  |  |   |  |   |   |
| 37 |                                                                                                                                                                                                                                                                                                                                   |  |  |   |  |   |   |
| 38 |                                                                                                                                                                                                                                                                                                                                   |  |  |   |  |   |   |
| 39 |                                                                                                                                                                                                                                                                                                                                   |  |  |   |  |   |   |
| 40 |                                                                                                                                                                                                                                                                                                                                   |  |  |   |  |   |   |
| 41 |                                                                                                                                                                                                                                                                                                                                   |  |  |   |  |   |   |
| 42 |                                                                                                                                                                                                                                                                                                                                   |  |  |   |  |   |   |
| 43 |                                                                                                                                                                                                                                                                                                                                   |  |  |   |  |   |   |
| 44 |                                                                                                                                                                                                                                                                                                                                   |  |  |   |  |   |   |
| 45 |                                                                                                                                                                                                                                                                                                                                   |  |  |   |  |   |   |
| 46 |                                                                                                                                                                                                                                                                                                                                   |  |  |   |  |   |   |

1  
2  
3  
4  
5  
6  
7  
8  
9  
10  
11  
12  
13  
14  
15  
16  
17  
18  
19  
20  
21  
22  
23  
24  
25  
26  
27  
28  
29  
30  
31  
32  
33  
34  
35  
36  
37  
38  
39  
40  
41  
42  
43  
44  
45  
46

|                                                                                                                                                                                                                                                                                           |  |  |   |   |   |   |   |
|-------------------------------------------------------------------------------------------------------------------------------------------------------------------------------------------------------------------------------------------------------------------------------------------|--|--|---|---|---|---|---|
| O'Donoghue L, Percival N, Laycock A, et al. Evaluating Aboriginal and Torres Strait Islander health promotion activities using audit and feedback. <i>Aust J Prim Health</i> 2014;20(4):339–44.                                                                                           |  |  | 1 |   |   | 1 |   |
| Bailie R, Bailie J, Chakraborty A, et al. Consistency of denominator data in electronic health records in Australian primary healthcare services: enhancing data quality. <i>Aust J Prim Health</i> 2015;21(4):450–9.                                                                     |  |  | 1 |   |   |   | 1 |
| Matthews V, Schierhout G, McBroom J, et al. Duration of participation in continuous quality improvement: a key factor explaining improved delivery of Type 2 diabetes services. <i>BMC Health Serv Res</i> 2014;14(1):578.                                                                |  |  | 1 |   | 1 |   |   |
| Brimblecombe J, Van Den Boogaard C, Ritchie J, et al. From targets to ripples: tracing the process of developing a community capacity building appraisal tool with remote Australian indigenous communities to tackle food security. <i>BMC Public Health</i> 2014;14(1):914.             |  |  | 1 |   |   | 1 |   |
| McDonald EL, Bailie RS, Morris PS. Participatory systems approach to health improvement in Australian Aboriginal children. <i>Health Promot Int</i> 2017;32(1):62–72.                                                                                                                     |  |  | 1 |   |   | 1 |   |
| Gausia K, Thompson SC, Nagel T, et al. Risk of antenatal psychosocial distress in indigenous women and its management at primary health care centres in Australia. <i>General Hospital Psychiatry</i> 2015;37(4):335–9.                                                                   |  |  |   | 1 | 1 |   |   |
| Puszka S, Nagel T, Matthews V, et al. Monitoring and assessing the quality of care for youth: developing an audit tool using an expert consensus approach. <i>Int J Ment Health Syst</i> 2015;9(1).                                                                                       |  |  |   | 1 | 1 |   |   |
| Gibson-Helm ME, Teede HJ, Rumbold AR, et al. Continuous quality improvement and metabolic screening during pregnancy at primary health centres attended by Aboriginal and Torres Strait Islander women. <i>MJA</i> 2015;203(9):369–70.                                                    |  |  |   | 1 | 1 |   |   |
| Tretheway R, Taylor J, O'Hara L, Percival N. A missing ethical competency? A review of critical reflection in health promotion. <i>Health Promot J Austr</i> 2015;26(3):216–21.                                                                                                           |  |  |   | 1 |   | 1 |   |
| McCalman J, Bainbridge R, Russo S, et al. Psycho-social resilience, vulnerability and suicide prevention: impact evaluation of a mentoring approach to modify suicide risk for remote Indigenous Australian students at boarding school. (Report). <i>BMC Public Health</i> 2016;16(108). |  |  |   | 1 |   | 1 |   |
| Newham J, Schierhout G, Bailie R, et al. 'There's only one enabler; come up, help us': staff perspectives of barriers and enablers to continuous quality improvement in Aboriginal primary health-care settings in South Australia. <i>Aust J Prim Health</i> 2016;22(3):244–54.          |  |  |   | 1 |   |   | 1 |



|    |                                                                                                                                                                                                                                                                                              |  |  |  |   |   |   |   |
|----|----------------------------------------------------------------------------------------------------------------------------------------------------------------------------------------------------------------------------------------------------------------------------------------------|--|--|--|---|---|---|---|
| 1  | Larkins S, Woods CE, Matthews V, et al. Responses of Aboriginal and Torres Strait Islander primary health-care services to continuous quality improvement initiatives. <i>Front Public Health</i> 2016;3:288.                                                                                |  |  |  | 1 | 1 |   |   |
| 2  |                                                                                                                                                                                                                                                                                              |  |  |  |   |   |   |   |
| 3  | Crinall B, Boyle J, Gibson-Helm M, et al. Cardiovascular disease risk in young Indigenous Australians: a snapshot of current preventive health care. <i>Aust N Z J Public Health</i> 2017;41(5):460–6.                                                                                       |  |  |  | 1 | 1 |   |   |
| 4  |                                                                                                                                                                                                                                                                                              |  |  |  |   |   |   |   |
| 5  | Bailie C, Matthews V, Bailie J, et al. Determinants and gaps in preventive care delivery for Indigenous Australians: a cross-sectional analysis. <i>Front Public Health</i> 2016;4.                                                                                                          |  |  |  | 1 | 1 |   |   |
| 6  |                                                                                                                                                                                                                                                                                              |  |  |  |   |   |   |   |
| 7  | Ralph AP, de Dassel JL, Kirby A, et al. Improving delivery of secondary prophylaxis for rheumatic heart disease in a high-burden setting: outcome of a stepped-wedge, community, randomized trial. <i>J Am Heart Assoc: Cardiovascular and Cerebrovascular Disease</i> 2018;7(14).           |  |  |  | 1 | 1 |   |   |
| 8  |                                                                                                                                                                                                                                                                                              |  |  |  |   |   |   |   |
| 9  | Vasant BR, Matthews V, Burgess CP, et al. Wide variation in absolute cardiovascular risk assessment in Aboriginal and Torres Strait Islander people with Type 2 diabetes. <i>Front Public Health</i> 2016;4:37.                                                                              |  |  |  | 1 | 1 |   |   |
| 10 |                                                                                                                                                                                                                                                                                              |  |  |  |   |   |   |   |
| 11 | Percival N, O'Donoghue L, Lin V, et al. Improving health promotion using quality improvement techniques in Australian Indigenous primary health care. <i>Front Public Health</i> 2016;4.                                                                                                     |  |  |  | 1 |   | 1 |   |
| 12 |                                                                                                                                                                                                                                                                                              |  |  |  |   |   |   |   |
| 13 | Laycock A, Bailie J, Matthews V, et al. Interactive dissemination: engaging stakeholders in the use of aggregated quality improvement data for system-wide change in Australian Indigenous primary health care. <i>Front Public Health</i> 2016;4.                                           |  |  |  | 1 |   |   | 1 |
| 14 |                                                                                                                                                                                                                                                                                              |  |  |  |   |   |   |   |
| 15 | Bailie J, Laycock A, Matthews V, et al. System-level action required for wide-scale improvement in quality of primary health care: synthesis of feedback from an interactive process to promote dissemination and use of aggregated quality of care data. <i>Front Public Health</i> 2016;4. |  |  |  | 1 | 1 |   |   |
| 16 |                                                                                                                                                                                                                                                                                              |  |  |  |   |   |   |   |
| 17 | Gibson-Helm M, Rumbold A, Teede H, et al. Improving the provision of pregnancy care for Aboriginal and Torres Strait Islander women: a continuous quality improvement initiative. <i>BMC Pregnancy Childbirth</i> 2016;16(118).                                                              |  |  |  | 1 | 1 |   |   |
| 18 |                                                                                                                                                                                                                                                                                              |  |  |  |   |   |   |   |
| 19 | Percival NA, McCalman J, Armit C, et al. Implementing health promotion tools in Australian Indigenous primary health care. <i>Health Promot Int</i> 2018;33(1):92–106.                                                                                                                       |  |  |  | 1 |   | 1 |   |
| 20 |                                                                                                                                                                                                                                                                                              |  |  |  |   |   |   |   |
| 21 | Hayward MN, Paquette-Warren J, Harris SB. Developing community-driven quality improvement initiatives to enhance chronic disease care in Indigenous communities in Canada: the FORGE AHEAD program protocol. <i>Health Res Policy Syst</i> 2016;14(1):55.                                    |  |  |  | 1 |   |   | 1 |
| 22 |                                                                                                                                                                                                                                                                                              |  |  |  |   |   |   |   |
| 23 |                                                                                                                                                                                                                                                                                              |  |  |  |   |   |   |   |
| 24 |                                                                                                                                                                                                                                                                                              |  |  |  |   |   |   |   |
| 25 |                                                                                                                                                                                                                                                                                              |  |  |  |   |   |   |   |
| 26 |                                                                                                                                                                                                                                                                                              |  |  |  |   |   |   |   |
| 27 |                                                                                                                                                                                                                                                                                              |  |  |  |   |   |   |   |
| 28 |                                                                                                                                                                                                                                                                                              |  |  |  |   |   |   |   |
| 29 |                                                                                                                                                                                                                                                                                              |  |  |  |   |   |   |   |
| 30 |                                                                                                                                                                                                                                                                                              |  |  |  |   |   |   |   |
| 31 |                                                                                                                                                                                                                                                                                              |  |  |  |   |   |   |   |
| 32 |                                                                                                                                                                                                                                                                                              |  |  |  |   |   |   |   |
| 33 |                                                                                                                                                                                                                                                                                              |  |  |  |   |   |   |   |
| 34 |                                                                                                                                                                                                                                                                                              |  |  |  |   |   |   |   |
| 35 |                                                                                                                                                                                                                                                                                              |  |  |  |   |   |   |   |
| 36 |                                                                                                                                                                                                                                                                                              |  |  |  |   |   |   |   |
| 37 |                                                                                                                                                                                                                                                                                              |  |  |  |   |   |   |   |
| 38 |                                                                                                                                                                                                                                                                                              |  |  |  |   |   |   |   |
| 39 |                                                                                                                                                                                                                                                                                              |  |  |  |   |   |   |   |
| 40 |                                                                                                                                                                                                                                                                                              |  |  |  |   |   |   |   |
| 41 |                                                                                                                                                                                                                                                                                              |  |  |  |   |   |   |   |
| 42 |                                                                                                                                                                                                                                                                                              |  |  |  |   |   |   |   |
| 43 |                                                                                                                                                                                                                                                                                              |  |  |  |   |   |   |   |
| 44 |                                                                                                                                                                                                                                                                                              |  |  |  |   |   |   |   |
| 45 |                                                                                                                                                                                                                                                                                              |  |  |  |   |   |   |   |
| 46 |                                                                                                                                                                                                                                                                                              |  |  |  |   |   |   |   |



1  
2  
3  
4  
5  
6  
7  
8  
9  
10  
11  
12  
13  
14  
15  
16  
17  
18  
19  
20  
21  
22  
23  
24  
25  
26  
27  
28  
29  
30  
31  
32  
33  
34  
35  
36  
37  
38  
39  
40  
41  
42  
43  
44  
45  
46

|                                                                                                                                                                                                                                                                                     |  |  |  |   |   |  |   |
|-------------------------------------------------------------------------------------------------------------------------------------------------------------------------------------------------------------------------------------------------------------------------------------|--|--|--|---|---|--|---|
| D'Aprano A, Silburn S, Johnston V, et al. Challenges in monitoring the development of young children in remote Aboriginal health services: clinical audit findings and recommendations for improving practice. <i>Rural Remote Health</i> 2016;16(3):3852.                          |  |  |  | 1 | 1 |  |   |
| Cunningham FC, Ferguson-Hill S, Matthews V, et al. Leveraging quality improvement through use of the Systems Assessment Tool in Indigenous primary health care services: a mixed methods study. <i>BMC Health Serv Res.</i> 2016;16(1).                                             |  |  |  | 1 |   |  | 1 |
| Schierhout G, Matthews V, Connors C, et al. Improvement in delivery of type 2 diabetes services differs by mode of care: a retrospective longitudinal analysis in the Aboriginal and Torres Strait Islander primary health care setting. <i>BMC Health Serv Res</i> 2016;16(1):560. |  |  |  | 1 | 1 |  |   |
| Burnett AM, Morse A, Naduvilath T, et al. Delivery of eye and vision services in Aboriginal and Torres Strait Islander primary healthcare centers. <i>Front Public Health</i> 2016;4.                                                                                               |  |  |  | 1 | 1 |  |   |
| Searles A, Doran C, Attia J, et al. An approach to measuring and encouraging research translation and research impact. <i>Health Res Policy Syst</i> 2016;14(1).                                                                                                                    |  |  |  | 1 |   |  | 1 |
| Doran CM, Ling R, Searles A, et al. Does evidence influence policy? Resource allocation and the Indigenous Burden of Disease Study. <i>Aust Health Rev</i> 2016;40(6):705–15.                                                                                                       |  |  |  | 1 |   |  | 1 |
| McCalman J, Bainbridge R, Percival N, et al. The effectiveness of implementation in Indigenous Australian healthcare: an overview of literature reviews. <i>Int J Equity Health</i> 2016;15:47.                                                                                     |  |  |  | 1 |   |  | 1 |
| Woods C, Carlisle K, Larkins S, et al. Exploring systems that support good clinical care in Indigenous primary health-care services: a retrospective analysis of longitudinal systems assessment tool data from high-improving services. <i>Front Public Health</i> 2017;5(45).     |  |  |  | 1 |   |  | 1 |
| Hayward MN, Mequanint S, Paquette-Warren J, et al. The FORGE AHEAD clinical readiness consultation tool: a validated tool to assess clinical readiness for chronic disease care mobilization in Canada's First Nations. <i>BMC Health Serv Res</i> 2017;17(1).                      |  |  |  | 1 |   |  | 1 |
| Kearns T, Ward F, Puszka S, et al. Anaemia health literacy of community members and health practitioners knowledge of best practice guidelines in a remote Australian Aboriginal community. <i>Univers J Public Health</i> 2017;5(1):32–9.                                          |  |  |  | 1 | 1 |  |   |
| Nattabi B, Matthews V, Bailie J, et al. Wide variation in sexually transmitted infection testing and counselling at Aboriginal primary health care centres in Australia: analysis of longitudinal continuous quality improvement data. <i>BMC Infect Dis</i> 2017;17(1).            |  |  |  | 1 | 1 |  |   |

|    |                                                                                                                                                                                                                                                                                       |  |  |  |   |   |   |   |
|----|---------------------------------------------------------------------------------------------------------------------------------------------------------------------------------------------------------------------------------------------------------------------------------------|--|--|--|---|---|---|---|
| 1  | Meiklejohn JA, Garvey G, Bailie R, et al. Follow-up cancer care: perspectives of Aboriginal and Torres Strait Islander cancer survivors. <i>Support Care Cancer</i> 2017;25(5):1597.                                                                                                  |  |  |  | 1 | 1 |   |   |
| 2  | Laycock A, Bailie J, Matthews V, et al. A developmental evaluation to enhance stakeholder engagement in a wide-scale interactive project disseminating quality improvement data: study protocol for a mixed-methods study. <i>BMJ Open</i> 2017;7(7).                                 |  |  |  | 1 |   |   | 1 |
| 3  | Bailie J, Matthews V, Laycock A, et al. Improving preventive health care in Aboriginal and Torres Strait Islander primary care settings. <i>Globalization and Health</i> 2017;13(1):48.                                                                                               |  |  |  | 1 | 1 |   |   |
| 4  | Brimblecombe J, Bailie R, van Den Boogaard C, et al. Feasibility of a novel participatory multi-sector continuous improvement approach to enhance food security in remote Indigenous Australian communities. <i>SSM – Popul Health</i> 2017;3(C):566–76.                              |  |  |  | 1 |   | 1 |   |
| 5  | Langham E, McCalman J, Matthews V, et al. Social and emotional wellbeing screening for Aboriginal and Torres Strait Islanders within primary health care: a series of missed opportunities? <i>Front Public Health</i> 2017;5:159.                                                    |  |  |  | 1 | 1 |   |   |
| 6  | de Witt A, Cunningham FC, Bailie R, Bernardes CM, Matthews V, Arley B, et al. Identification of Australian Aboriginal and Torres Strait Islander cancer patients in the primary health care setting. <i>Front Public Health</i> 2017;5:199.                                           |  |  |  | 1 | 1 |   |   |
| 7  | Matthews V, Burgess CP, Connors C, et al. Integrated clinical decision support systems promote absolute cardiovascular risk assessment: an important primary prevention measure in Aboriginal and Torres Strait Islander primary health care. <i>Front Public Health</i> 2017;5(233). |  |  |  | 1 | 1 |   |   |
| 8  | Bailie R, Matthews V, Larkins S, et al. Impact of policy support on uptake of evidence-based continuous quality improvement activities and the quality of care for Indigenous Australians: a comparative case study. <i>BMJ Open</i> 2017;7(10).                                      |  |  |  | 1 |   |   | 1 |
| 9  | Zuchowski I, Miles D, Woods C, Tsey K. Continuous quality improvement processes in child protection: a systematic literature review. <i>Res Soc Work Pract</i> 2017;1049731517743337.                                                                                                 |  |  |  | 1 |   | 1 |   |
| 10 | Ramanathan S, Reeves P, Deeming S, et al. Encouraging translation and assessing impact of the Centre for Research Excellence in Integrated Quality Improvement: rationale and protocol for a research impact assessment. <i>BMJ Open</i> 2017;7(12).                                  |  |  |  | 1 |   |   | 1 |
| 11 | Bailie R, Bailie J, Larkins S, Broughton E. Editorial: Continuous quality improvement (CQI) – advancing understanding of design, application, impact, and evaluation of CQI approaches. <i>Front Public Health</i> 2017;5(306).                                                       |  |  |  | 1 |   |   | 1 |
| 12 | Bailie R, Larkins S, Broughton E. Continuous Quality Improvement – Advancing Understanding of Design, Application, Impact and Evaluation of CQI Approaches. Lausanne, Switzerland: Frontiers Media SA 2017.                                                                           |  |  |  | 1 | 1 |   |   |

1  
2  
3  
4  
5  
6  
7  
8  
9  
10  
11  
12  
13  
14  
15  
16  
17  
18  
19  
20  
21  
22  
23  
24  
25  
26  
27  
28  
29  
30  
31  
32  
33  
34  
35  
36  
37  
38  
39  
40  
41  
42  
43  
44  
45  
46

|                                                                                                                                                                                                                                                      |  |  |  |   |   |   |   |
|------------------------------------------------------------------------------------------------------------------------------------------------------------------------------------------------------------------------------------------------------|--|--|--|---|---|---|---|
| McAullay D, McAuley K, Bailie R, et al. Sustained participation in annual continuous quality improvement activities improves quality of care for Aboriginal and Torres Strait Islander children. <i>J Paediatr Child Health</i> 2018;54(2):132–40.   |  |  |  | 1 | 1 |   |   |
| Edmond KM, McAuley K, McAullay D, et al. Quality of social and emotional wellbeing services for families of young Indigenous children attending primary care centers; a cross sectional analysis. <i>BMC Health Serv Res</i> 2018;18(1).             |  |  |  | 1 | 1 |   |   |
| Gibson-Helm ME, Bailie J, Matthews V, et al. Identifying evidence-practice gaps and strategies for improvement in Aboriginal and Torres Strait Islander maternal health care. <i>PLoS ONE</i> 2018;13(2):e0192262.                                   |  |  |  | 1 | 1 |   |   |
| Bailie J, Matthews V, Laycock A, et al. Rigorous follow-up systems for abnormal results are essential to improve health outcomes for Aboriginal and Torres Strait Islander people. <i>Aust J Prim Health</i> 2018;24:1–3.                            |  |  |  | 1 |   |   | 1 |
| McCalman J, Bailie R, Bainbridge R, et al. Continuous quality improvement and comprehensive primary health care: a systems framework to improve service quality and health outcomes. <i>Front Public Health</i> 2018;6.                              |  |  |  | 1 |   |   | 1 |
| McPhail-Bell K, Matthews V, Bainbridge R, et al. An ‘All Teach, All Learn’ approach to research capacity strengthening in Indigenous primary health care continuous quality improvement. <i>Front Public Health</i> 2018;6.                          |  |  |  | 1 |   | 1 |   |
| McCalman J, Bainbridge R, Brown C, et al. The Aboriginal Australian Family Wellbeing Program: a historical analysis of the conditions that enabled its spread. <i>Front Public Health</i> 2018;6.                                                    |  |  |  | 1 |   |   | 1 |
| Bailie J, Cunningham FC, Bainbridge RG, et al. Comparing and contrasting ‘innovation platforms’ with other forms of professional networks for strengthening primary healthcare systems for Indigenous Australians. <i>BMJ Glob Health</i> 2018;3(3). |  |  |  | 1 | 1 |   |   |
| Meiklejohn JA, Arley B, Bailie R, et al. Community-identified recommendations to enhance cancer survivorship for Aboriginal and Torres Strait Islander people. <i>Aust J Prim Health</i> 2018;24(3):233–40.                                          |  |  |  | 1 | 1 |   |   |
| Bailie J, Boyle JA, Bailie RS. Population attributable fractions of perinatal outcomes for nulliparous women associated with overweight and obesity, 1990–2014. <i>Med J Aust</i> 2018;208(11):505–6.                                                |  |  |  | 1 |   |   | 1 |
| Cunningham FC, Matthews V, Sheahan A, et al. Assessing collaboration in a National Research Partnership in Quality Improvement in Indigenous Primary Health Care: a network approach. <i>Front Public Health</i> . 2018;6(182).                      |  |  |  | 1 |   | 1 |   |
| Onnis L-A, Klieve H, Tsey K. The evidence needed to demonstrate impact: A synthesis of the evidence from a phased social and emotional wellbeing intervention. <i>Eval Program Plann</i> 2018;70:35–43.                                              |  |  |  | 1 | 1 |   |   |

|                                                                                                                                                                                                                                                                                    |  |  |  |   |   |   |   |
|------------------------------------------------------------------------------------------------------------------------------------------------------------------------------------------------------------------------------------------------------------------------------------|--|--|--|---|---|---|---|
| Ralph AP, de Dassel JL, Kirby A, et al. Improving delivery of secondary prophylaxis for Rheumatic Heart Disease in a high-burden setting: outcome of a stepped-wedge, community, randomized trial. <i>J Am Heart Assoc: Cardiovascular and Cerebrovascular Disease</i> 2018;7(14). |  |  |  | 1 |   | 1 |   |
| Heyeres M, Kinchin I, Whatley E, et al. Evaluation of a residential mental health recovery service in North Queensland. <i>Front Public Health</i> 2018;6:123.                                                                                                                     |  |  |  | 1 | 1 |   |   |
| Read C, Mitchell AG, de Dassel JL, et al. Qualitative evaluation of a complex intervention to improve Rheumatic Heart Disease secondary prophylaxis. <i>J Am Heart Assoc.</i> 2018;7(14).                                                                                          |  |  |  | 1 | 1 |   |   |
| Nattabi B, Girgis S, Matthews V, et al. Clinic predictors of better syphilis testing in Aboriginal primary healthcare: a promising opportunity for primary healthcare service managers. <i>Aust J Prim Health</i> 2018;24(4):350–8.                                                |  |  |  | 1 | 1 |   |   |
| Edmond KM, Tung S, McAuley K, et al. Improving developmental care in primary practice for disadvantaged children. <i>Arch Dis Childhood</i> 2019;104(4):372–80.                                                                                                                    |  |  |  | 1 | 1 |   |   |
| Strobel NA, McAuley K, Matthews V, et al. Understanding the structure and processes of primary health care for young indigenous children. <i>J Prim Health Care</i> 2018;10(3):267–78.                                                                                             |  |  |  | 1 |   | 1 |   |
| Onnis L-A, Hakendorf M, Tsey K. How are Continuous Quality Improvement (CQI) approaches used in evaluating management development programs? a literature review. <i>Asia Pacific Journal of Health Management</i> 2018;13(2):1–15.                                                 |  |  |  | 1 |   |   | 1 |
| Smith G, Kirkham R, Gunabarra C, et al. ‘We can work together, talk together’: an Aboriginal health care home. <i>Aust Health Rev</i> 2018;43:486–91.                                                                                                                              |  |  |  | 1 |   | 1 |   |
| Tsey K, Lui SM, Heyeres M, et al. Developing soft skills: exploring the feasibility of an Australian well-being program for health managers and leaders in Timor-Leste. <i>SAGE Open</i> 2018;8(4).                                                                                |  |  |  | 1 |   |   | 1 |
| Laycock A, Harvey G, Percival N, et al. Application of the i-PARIHS framework for enhancing understanding of interactive dissemination to achieve wide-scale improvement in Indigenous primary healthcare. <i>Health Res Policy Syst</i> 2018;16(1).                               |  |  |  | 1 | 1 |   |   |
| de Witt A, Cunningham FC, Bailie R, et al. ‘It’s just presence’, the contributions of Aboriginal and Torres Strait Islander health professionals in cancer care in Queensland. <i>Front Public Health</i> 2018;6:344.                                                              |  |  |  | 1 |   | 1 |   |
| Zuchowski I, Miles D, Gair S, et al. K. Social work research with industry: a systematic literature review of engagement and impact. <i>Br J Soc Work</i> 2019;49(8):2299–324.                                                                                                     |  |  |  | 1 |   |   | 1 |
| Heyeres M, Tsey K, Yang Y, et al. The characteristics and reporting quality of research impact case studies: a systematic review. <i>Eval Program Plann</i> 2019;73:10–23.                                                                                                         |  |  |  | 1 |   |   | 1 |

1  
2  
3  
4  
5  
6  
7  
8  
9  
10  
11  
12  
13  
14  
15  
16  
17  
18  
19  
20  
21  
22  
23  
24  
25  
26  
27  
28  
29  
30  
31  
32  
33  
34  
35  
36  
37  
38  
39  
40  
41  
42  
43  
44  
45  
46

|                                                                                                                                                                                                                                                                                      |  |  |  |   |   |   |   |
|--------------------------------------------------------------------------------------------------------------------------------------------------------------------------------------------------------------------------------------------------------------------------------------|--|--|--|---|---|---|---|
| Laycock AF, Bailie J, Percival NA, et al. Wide-scale continuous quality improvement: a study of stakeholders' use of quality of care reports at various system levels, and factors mediating use. <i>Front Public Health</i> 2019;6.                                                 |  |  |  | 1 | 1 |   |   |
| Bailie J, Laycock A, Matthews V, et al. Emerging evidence of the value of health assessments for Aboriginal and Torres Strait Islander people in the primary healthcare setting. <i>Aust J Prim Health</i> 2019;25(1):1-5.                                                           |  |  |  | 1 |   |   | 1 |
| Tsey K, Onnis L-A, Whiteside M, et al. Assessing research impact: Australian Research Council criteria and the case of Family Wellbeing research. <i>Eval Program Plann</i> 2019;73:176-86.                                                                                          |  |  |  | 1 | 1 |   |   |
| Lestari T, Graham S, Van den Boogard C, et al. Bridging the knowledge-practice gap in tuberculosis contact management in a high-burden setting: a mixed-methods protocol for a multicenter health system strengthening study. <i>Implement Sci</i> 2019;14(1):31.                    |  |  |  | 1 |   | 1 |   |
| Onnis L-A, Hakendorf M, Diamond M, et al. CQI approaches for evaluating management development programs: a case study with health service managers from geographically remote settings. <i>Eval Program Plann</i> 2019;74:91-101.                                                    |  |  |  | 1 |   |   | 1 |
| Turner NN, Taylor J, Larkins S, et al. Conceptualizing the association between community participation and CQI in Aboriginal and Torres Strait Islander PHC services. <i>Qual Health Res</i> 2019;29(13):1904-15.                                                                    |  |  |  | 1 | 1 |   |   |
| Gunaratnam P, Schierhout G, Brands J, et al. Qualitative perspectives on the sustainability of sexual health continuous quality improvement in clinics serving remote Aboriginal communities in Australia. <i>BMJ Open</i> 2019;9(5):e026679.                                        |  |  |  | 1 | 1 |   |   |
| Valery PC, Bernardes CM, De Witt A, et al. Patterns of primary health care service use of Indigenous Australians diagnosed with cancer. <i>Support Care Cancer</i> 2020;28(1):317-27.                                                                                                |  |  |  | 1 | 1 |   |   |
| Mitchinson C, Strobel N, McAullay D, et al. Anemia in disadvantaged children aged under five years: quality of care in primary practice. <i>BMC Pediatr</i> 2019;19(1):178.                                                                                                          |  |  |  | 1 |   |   | 1 |
| Larkins S, Carlisle K, Turner N, et al. 'At the grass roots level it's about sitting down and talking': exploring quality improvement through case studies with high-improving Aboriginal and Torres Strait Islander primary healthcare services. <i>BMJ Open</i> 2019;9(5):e027568. |  |  |  | 1 |   | 1 |   |
| Conte KP, Gwynn J, Turner N, Koller C, Gillham KE. Making space for Aboriginal and Torres Strait Islander community health workers in health promotion. <i>Health Promot Int</i> 2019.                                                                                               |  |  |  | 1 | 1 |   |   |
| Carroll SJ, Dale MJ, Bailie R, et al. Climatic and community sociodemographic factors associated with remote Indigenous Australian smoking rates: an ecological study of health audit data. <i>BMJ Open</i> 2019;9(7).                                                               |  |  |  | 1 |   |   | 1 |

|    |                                                                                                                                                                                                                                                                                                       |  |  |  |   |   |   |   |
|----|-------------------------------------------------------------------------------------------------------------------------------------------------------------------------------------------------------------------------------------------------------------------------------------------------------|--|--|--|---|---|---|---|
| 1  | Preston R, Rannard S, Felton-Busch C, et al. How and why do participatory women's groups (PWGs) improve the quality of maternal and child health (MCH) care? A systematic review protocol. <i>BMJ Open</i> 2019;9(9):e030461.                                                                         |  |  |  | 1 |   |   | 1 |
| 2  | Laycock A, Bailie J, Matthews V, et al. Using developmental evaluation to support knowledge translation: reflections from a large-scale quality improvement project in Indigenous primary healthcare. <i>Health Res Policy Syst</i> 2019;17(1):70.                                                    |  |  |  | 1 | 1 |   |   |
| 3  | Diaz A, Vo B, Baade PD, Matthews V, et al. Service level factors associated with cervical screening in Aboriginal and Torres Strait Islander primary health care centres in Australia. <i>Int J Environ Res Public Health</i> 2019;16(19):3630.                                                       |  |  |  | 1 | 1 |   |   |
| 4  | Kinchin I, Russell AM, Tsey K, et al. Psychiatric inpatient cost of care before and after admission at a residential subacute step-up/step-down mental health facility. <i>J Med Econ</i> 2019;22(5):491–8.                                                                                           |  |  |  | 1 |   | 1 |   |
| 5  | Lopez-Carmen V, McCalman J, Benveniste T, Askew D, Spurling G, Langham E, et al. Working together to improve the mental health of indigenous children: a systematic review. <i>Child Youth Serv Rev</i> 2019;104:104408.                                                                              |  |  |  | 1 |   |   | 1 |
| 6  | Tsey K. Working on Wicked Problems: A Strengths-based Approach to Research Engagement and Impact. Basel, Switzerland: Springer Nature 2019.                                                                                                                                                           |  |  |  | 1 |   |   | 1 |
| 7  | Cunningham FC, Ranmuthugala G, Westbrook JI, et al. Tackling the wicked problem of health networks: the design of an evaluation framework. <i>BMJ Open</i> 2019;9(5):e024231.                                                                                                                         |  |  |  | 1 |   | 1 |   |
| 8  | Onnis L-A, Moylan R, Whiteside M, et al. Integrating the Family Wellbeing Program into practice: a conceptual model. <i>Australian Social Work</i> 2019:1–14.                                                                                                                                         |  |  |  | 1 | 1 |   |   |
| 9  | Carrington A, Dewar S, Kinchin I, et al. A police-led community response to child abuse and youth sexual violence and abuse in Indigenous communities in Far North Queensland: 'Speak up. Be strong. Be heard'. <i>Child Abuse Negl</i> 2019;98:104228.                                               |  |  |  | 1 |   |   | 1 |
| 10 | Fazelipour M, Cunningham F. Barriers and facilitators to the implementation of brief interventions targeting smoking, nutrition, and physical activity for indigenous populations: a narrative review. <i>Int J Equity Health</i> 2019;18(1):169.                                                     |  |  |  | 1 | 1 |   |   |
| 11 | Katzenellenbogen J, Bond-Smith D, Ralph A, et al. Priorities for improvement in management of Acute Rheumatic Fever and Rheumatic Heart Disease: analysis of cross-sectional continuous quality improvement data in Aboriginal primary health care centres in Australia. <i>Aust Health Rev</i> 2019. |  |  |  | 1 | 1 |   |   |
| 12 | Quinn E, Girgis S, Van Buskirk J, Matthews V, Ward JE. Clinic factors associated with better delivery of secondary prophylaxis in acute rheumatic fever management. <i>Aust J Gen Pract</i> 2019;48(12):859.                                                                                          |  |  |  | 1 | 1 |   |   |

1  
2  
3  
4  
5  
6  
7  
8  
9  
10  
11  
12  
13  
14  
15  
16  
17  
18  
19  
20  
21  
22  
23  
24  
25  
26  
27  
28  
29  
30  
31  
32  
33  
34  
35  
36  
37  
38  
39  
40  
41  
42  
43  
44  
45  
46

|                                                                                                                                                                                                                 |  |  |  |   |   |  |  |
|-----------------------------------------------------------------------------------------------------------------------------------------------------------------------------------------------------------------|--|--|--|---|---|--|--|
| Adily A, Girgis S, D'Este C, Matthews V, Ward JE. Syphilis testing performance in Aboriginal primary health care: exploring impact of continuous quality improvement over time. <i>Aust J Prim Health</i> 2020. |  |  |  | 1 | 1 |  |  |
|-----------------------------------------------------------------------------------------------------------------------------------------------------------------------------------------------------------------|--|--|--|---|---|--|--|

For peer review only



**The RECORD statement – checklist of items, extended from the STROBE statement, that should be reported in observational studies using routinely collected health data.**

|                           | Item No. | STROBE items                                                                                                                                                                               | Location in manuscript where items are reported                             | RECORD items                                                                                                                                                                                                                                                                                                                                                                                                                                       | Location in manuscript where items are reported                                             |
|---------------------------|----------|--------------------------------------------------------------------------------------------------------------------------------------------------------------------------------------------|-----------------------------------------------------------------------------|----------------------------------------------------------------------------------------------------------------------------------------------------------------------------------------------------------------------------------------------------------------------------------------------------------------------------------------------------------------------------------------------------------------------------------------------------|---------------------------------------------------------------------------------------------|
| <b>Title and abstract</b> |          |                                                                                                                                                                                            |                                                                             |                                                                                                                                                                                                                                                                                                                                                                                                                                                    |                                                                                             |
|                           | 1        | (a) Indicate the study's design with a commonly used term in the title or the abstract (b) Provide in the abstract an informative and balanced summary of what was done and what was found | Title and abstract                                                          | <p>RECORD 1.1: The type of data used should be specified in the title or abstract. When possible, the name of the databases used should be included.</p> <p>RECORD 1.2: If applicable, the geographic region and timeframe within which the study took place should be reported in the title or abstract.</p> <p>RECORD 1.3: If linkage between databases was conducted for the study, this should be clearly stated in the title or abstract.</p> | <p>Title and abstract</p> <p>Abstract, though some information in title also.</p> <p>NA</p> |
| <b>Introduction</b>       |          |                                                                                                                                                                                            |                                                                             |                                                                                                                                                                                                                                                                                                                                                                                                                                                    |                                                                                             |
| Background rationale      | 2        | Explain the scientific background and rationale for the investigation being reported                                                                                                       | Introduction paragraphs 1 -3                                                |                                                                                                                                                                                                                                                                                                                                                                                                                                                    |                                                                                             |
| Objectives                | 3        | State specific objectives, including any prespecified hypotheses                                                                                                                           | Introduction paragraph 3                                                    |                                                                                                                                                                                                                                                                                                                                                                                                                                                    |                                                                                             |
| <b>Study Design</b>       |          |                                                                                                                                                                                            |                                                                             |                                                                                                                                                                                                                                                                                                                                                                                                                                                    |                                                                                             |
| Study Design              | 4        | Present key elements of study design early in the paper                                                                                                                                    | Title, Abstract, Introduction and Methods                                   |                                                                                                                                                                                                                                                                                                                                                                                                                                                    |                                                                                             |
| Setting                   | 5        | Describe the setting, locations, and relevant dates, including periods of recruitment, exposure, follow-up, and data collection                                                            | Setting described, specifically see Table 1; along with time periods (2002- |                                                                                                                                                                                                                                                                                                                                                                                                                                                    |                                                                                             |



|              |   |                                                                                                                                                                                                                                                                                                                                                                                                                                                                                                                                                                                                                                                                                                                              |                                                                                                                                                               |                                                                                                                                                                                                                                                                                                                                                                                                                                                                                                                                                                                                                                                                                                      |                                                                                                                                                                                          |
|--------------|---|------------------------------------------------------------------------------------------------------------------------------------------------------------------------------------------------------------------------------------------------------------------------------------------------------------------------------------------------------------------------------------------------------------------------------------------------------------------------------------------------------------------------------------------------------------------------------------------------------------------------------------------------------------------------------------------------------------------------------|---------------------------------------------------------------------------------------------------------------------------------------------------------------|------------------------------------------------------------------------------------------------------------------------------------------------------------------------------------------------------------------------------------------------------------------------------------------------------------------------------------------------------------------------------------------------------------------------------------------------------------------------------------------------------------------------------------------------------------------------------------------------------------------------------------------------------------------------------------------------------|------------------------------------------------------------------------------------------------------------------------------------------------------------------------------------------|
|              |   |                                                                                                                                                                                                                                                                                                                                                                                                                                                                                                                                                                                                                                                                                                                              | 2004; 2005-2009; 2010-2014; 2015-2019)                                                                                                                        |                                                                                                                                                                                                                                                                                                                                                                                                                                                                                                                                                                                                                                                                                                      |                                                                                                                                                                                          |
| Participants | 6 | <p>(a) <i>Cohort study</i> - Give the eligibility criteria, and the sources and methods of selection of participants. Describe methods of follow-up</p> <p><i>Case-control study</i> - Give the eligibility criteria, and the sources and methods of case ascertainment and control selection. Give the rationale for the choice of cases and controls</p> <p><i>Cross-sectional study</i> - Give the eligibility criteria, and the sources and methods of selection of participants</p> <p>(b) <i>Cohort study</i> - For matched studies, give matching criteria and number of exposed and unexposed</p> <p><i>Case-control study</i> - For matched studies, give matching criteria and the number of controls per case</p> | Persons and the organisations they were affiliated with were included if they co-authored a relevant publication in the study period as described in methods. | <p>RECORD 6.1: The methods of study population selection (such as codes or algorithms used to identify subjects) should be listed in detail. If this is not possible, an explanation should be provided.</p> <p>RECORD 6.2: Any validation studies of the codes or algorithms used to select the population should be referenced. If validation was conducted for this study and not published elsewhere, detailed methods and results should be provided.</p> <p>RECORD 6.3: If the study involved linkage of databases, consider use of a flow diagram or other graphical display to demonstrate the data linkage process, including the number of individuals with linked data at each stage.</p> | <p>Persons and the organisations they were affiliated with were included if they co-authored a relevant publication in the study period as described in methods.</p> <p>NA</p> <p>NA</p> |
| Variables    | 7 | Clearly define all outcomes, exposures, predictors, potential confounders, and effect modifiers. Give diagnostic criteria, if applicable.                                                                                                                                                                                                                                                                                                                                                                                                                                                                                                                                                                                    | Definitions of categories provided in manuscript. In Methods section under heading ‘Data categorisation, standardisation and cleaning’                        | RECORD 7.1: A complete list of codes and algorithms used to classify exposures, outcomes, confounders, and effect modifiers should be provided. If these cannot be reported, an explanation should be provided.                                                                                                                                                                                                                                                                                                                                                                                                                                                                                      | Definitions of categories provided in manuscript. In Methods section under heading ‘Data categorisation, standardisation and cleaning’                                                   |

|                                                                                            |                              |    |                                                                                                                                                                                      |                                                                                                                                                                                     |                                                                                                                                                                                     |
|--------------------------------------------------------------------------------------------|------------------------------|----|--------------------------------------------------------------------------------------------------------------------------------------------------------------------------------------|-------------------------------------------------------------------------------------------------------------------------------------------------------------------------------------|-------------------------------------------------------------------------------------------------------------------------------------------------------------------------------------|
| 1<br>2<br>3<br>4<br>5<br>6<br>7                                                            | Data sources/<br>measurement | 8  | For each variable of interest, give sources of data and details of methods of assessment (measurement). Describe comparability of assessment methods if there is more than one group | Detailed in results - Table 3                                                                                                                                                       | Detailed in results – Table 3.                                                                                                                                                      |
| 8<br>9<br>10<br>11<br>12<br>13<br>14<br>15<br>16<br>17<br>18<br>19<br>20<br>21<br>22<br>23 | Bias                         | 9  | Describe any efforts to address potential sources of bias                                                                                                                            | Detailed in methods, eg. Having two authors undertaking categorisation in a blind manner, then conferring for any discrepancies; group analysis processes by reviews of co-authors. | Detailed in methods, eg. Having two authors undertaking categorisation in a blind manner, then conferring for any discrepancies; group analysis processes by reviews of co-authors. |
| 24<br>25<br>26<br>27<br>28<br>29                                                           | Study size                   | 10 | Explain how the study size was arrived at                                                                                                                                            | Detailed in methods – eg Publications within the period under study.                                                                                                                | Detailed in methods eg. Publications within the period under study.                                                                                                                 |
| 30<br>31<br>32<br>33<br>34<br>35                                                           | Quantitative variables       | 11 | Explain how quantitative variables were handled in the analyses. If applicable, describe which groupings were chosen, and why                                                        | NA                                                                                                                                                                                  |                                                                                                                                                                                     |
| 36<br>37<br>38<br>39<br>40<br>41<br>42                                                     | Statistical methods          | 12 | (a) Describe all statistical methods, including those used to control for confounding<br>(b) Describe any methods used to examine subgroups and interactions                         | NA                                                                                                                                                                                  |                                                                                                                                                                                     |

|                                  |    |                                                                                                                                                                                                                                                                                                                                                                                                                             |  |                                                                                                                                                                                                                                                                     |                                                                                                                    |
|----------------------------------|----|-----------------------------------------------------------------------------------------------------------------------------------------------------------------------------------------------------------------------------------------------------------------------------------------------------------------------------------------------------------------------------------------------------------------------------|--|---------------------------------------------------------------------------------------------------------------------------------------------------------------------------------------------------------------------------------------------------------------------|--------------------------------------------------------------------------------------------------------------------|
|                                  |    | <p>(c) Explain how missing data were addressed</p> <p>(d) <i>Cohort study</i> - If applicable, explain how loss to follow-up was addressed</p> <p><i>Case-control study</i> - If applicable, explain how matching of cases and controls was addressed</p> <p><i>Cross-sectional study</i> - If applicable, describe analytical methods taking account of sampling strategy</p> <p>(e) Describe any sensitivity analyses</p> |  |                                                                                                                                                                                                                                                                     |                                                                                                                    |
| Data access and cleaning methods |    | ..                                                                                                                                                                                                                                                                                                                                                                                                                          |  | <p>RECORD 12.1: Authors should describe the extent to which the investigators had access to the database population used to create the study population.</p> <p>RECORD 12.2: Authors should provide information on the data cleaning methods used in the study.</p> | <p>Noted in Methods eg. Internal project records used. Publications retrieved from publicly available sources.</p> |
| Linkage                          |    | ..                                                                                                                                                                                                                                                                                                                                                                                                                          |  | <p>RECORD 12.3: State whether the study included person-level, institutional-level, or other data linkage across two or more databases. The methods of linkage and methods of linkage quality evaluation should be provided.</p>                                    | NA                                                                                                                 |
| <b>Results</b>                   |    |                                                                                                                                                                                                                                                                                                                                                                                                                             |  |                                                                                                                                                                                                                                                                     |                                                                                                                    |
| Participants                     | 13 | <p>(a) Report the numbers of individuals at each stage of the study (<i>e.g.</i>, numbers potentially eligible, examined for eligibility, confirmed eligible, included in</p>                                                                                                                                                                                                                                               |  | <p>RECORD 13.1: Describe in detail the selection of the persons included in the study (<i>i.e.</i>, study population selection) including filtering based on data quality, data availability and linkage. The selection of included persons can</p>                 | <p>Noted in methods – eg. Persons and the organisations they were affiliated with were included if</p>             |

1  
2  
3  
4  
5  
6  
7  
8  
9  
10  
11  
12  
13  
14  
15  
16  
17  
18  
19  
20  
21  
22  
23  
24  
25  
26  
27  
28  
29  
30  
31  
32  
33  
34  
35  
36  
37  
38  
39  
40  
41  
42  
43  
44  
45  
46  
47

|                  |    |                                                                                                                                                                                                                                                                                                                                                 |                                                                                                 |                                                                     |                                                                                      |
|------------------|----|-------------------------------------------------------------------------------------------------------------------------------------------------------------------------------------------------------------------------------------------------------------------------------------------------------------------------------------------------|-------------------------------------------------------------------------------------------------|---------------------------------------------------------------------|--------------------------------------------------------------------------------------|
|                  |    | the study, completing follow-up, and analysed)<br>(b) Give reasons for non-participation at each stage.<br>(c) Consider use of a flow diagram                                                                                                                                                                                                   |                                                                                                 | be described in the text and/or by means of the study flow diagram. | they co-authored a relevant publication in the study period as described in methods. |
| Descriptive data | 14 | (a) Give characteristics of study participants ( <i>e.g.</i> , demographic, clinical, social) and information on exposures and potential confounders<br>(b) Indicate the number of participants with missing data for each variable of interest<br>(c) <i>Cohort study</i> - summarise follow-up time ( <i>e.g.</i> , average and total amount) | Table 3 in the results contains characteristics of study participants.                          |                                                                     |                                                                                      |
| Outcome data     | 15 | <i>Cohort study</i> - Report numbers of outcome events or summary measures over time<br><i>Case-control study</i> - Report numbers in each exposure category, or summary measures of exposure<br><i>Cross-sectional study</i> - Report numbers of outcome events or summary measures                                                            | NA                                                                                              |                                                                     |                                                                                      |
| Main results     | 16 | (a) Give unadjusted estimates and, if applicable, confounder-adjusted estimates and their precision ( <i>e.g.</i> , 95% confidence interval). Make clear which confounders were adjusted for and why they were included<br>(b) Report category boundaries when continuous variables were categorized                                            | In results in Table 3 <i>eg.</i> (b) Phases of the network (time) were based on funding cycles. |                                                                     |                                                                                      |

|                          |    |                                                                                                                                                                            |                                                                                                               |                                                                                                                                                                                                                                                                                                          |    |
|--------------------------|----|----------------------------------------------------------------------------------------------------------------------------------------------------------------------------|---------------------------------------------------------------------------------------------------------------|----------------------------------------------------------------------------------------------------------------------------------------------------------------------------------------------------------------------------------------------------------------------------------------------------------|----|
|                          |    | (c) If relevant, consider translating estimates of relative risk into absolute risk for a meaningful time period                                                           |                                                                                                               |                                                                                                                                                                                                                                                                                                          |    |
| Other analyses           | 17 | Report other analyses done— e.g., analyses of subgroups and interactions, and sensitivity analyses                                                                         | Table 3 in results eg. Descriptive counts and percentages. Network measures as described in methods section.  |                                                                                                                                                                                                                                                                                                          |    |
| <b>Discussion</b>        |    |                                                                                                                                                                            |                                                                                                               |                                                                                                                                                                                                                                                                                                          |    |
| Key results              | 18 | Summarise key results with reference to study objectives                                                                                                                   | Paragraph 1 of Discussion                                                                                     |                                                                                                                                                                                                                                                                                                          |    |
| Limitations              | 19 | Discuss limitations of the study, taking into account sources of potential bias or imprecision. Discuss both direction and magnitude of any potential bias                 | Discussion – under heading ‘strengths and limitations’                                                        | RECORD 19.1: Discuss the implications of using data that were not created or collected to answer the specific research question(s). Include discussion of misclassification bias, unmeasured confounding, missing data, and changing eligibility over time, as they pertain to the study being reported. | NA |
| Interpretation           | 20 | Give a cautious overall interpretation of results considering objectives, limitations, multiplicity of analyses, results from similar studies, and other relevant evidence | Discussion - The results of the study are compared to findings from other national and international studies. |                                                                                                                                                                                                                                                                                                          |    |
| Generalisability         | 21 | Discuss the generalisability (external validity) of the study results                                                                                                      | Discussion - The lack of generalisability to other settings is noted                                          |                                                                                                                                                                                                                                                                                                          |    |
| <b>Other Information</b> |    |                                                                                                                                                                            |                                                                                                               |                                                                                                                                                                                                                                                                                                          |    |
| Funding                  | 22 | Give the source of funding and the role of the funders for the present study and, if applicable,                                                                           | Funding source provided to the BMJ Quality and Safety                                                         |                                                                                                                                                                                                                                                                                                          |    |

|                                                           |  |                                                              |                                                                                                             |                                                                                                                                                          |                                                                                                                                                                             |
|-----------------------------------------------------------|--|--------------------------------------------------------------|-------------------------------------------------------------------------------------------------------------|----------------------------------------------------------------------------------------------------------------------------------------------------------|-----------------------------------------------------------------------------------------------------------------------------------------------------------------------------|
|                                                           |  | for the original study on which the present article is based | Journal, though it is not in the article (at this stage) for the Journal has a triple blind review process. |                                                                                                                                                          |                                                                                                                                                                             |
| Accessibility of protocol, raw data, and programming code |  | ..                                                           |                                                                                                             | RECORD 22.1: Authors should provide information on how to access any supplemental information such as the study protocol, raw data, or programming code. | Noted in the BMJ Quality and Safety submission process that the data is available on reasonable request to the corresponding author, and it adheres to the ethics approval. |

\*Reference: Benchimol EI, Smeeth L, Guttman A, Harron K, Moher D, Petersen I, Sørensen HT, von Elm E, Langan SM, the RECORD Working Committee. The REporting of studies Conducted using Observational Routinely-collected health Data (RECORD) Statement. *PLoS Medicine* 2015; in press.

\*Checklist is protected under Creative Commons Attribution ([CC BY](https://creativecommons.org/licenses/by/4.0/)) license.
