# Supplementary material for: Collaboration and knowledge generation in an 18-year quality improvement research programme in Australian Indigenous primary healthcare: a coauthorship network analysis
Source: PubMed Central journal article supplement — BMJ Open. 2021 May 6;11(5):e045101. doi: 10.1136/bmjopen-2020-045101 (PMC8103942; doi:10.1136/bmjopen-2020-045101), 2021-05-06
Supplement: bmjopen-2020-045101supp001.pdf [file bmjopen-2020-045101supp001.pdf]

**SUPPLEMENTARY FILE 1***Table S1: Total number of publications, per author, for those who have published 5 or more as part of the research collaboration, 2002–2019*

| Author name (last_first)  | Total number of publications |
|---------------------------|------------------------------|
| Bailie_Ross               | 97                           |
| Matthews_Veronica         | 36                           |
| Thompson_Sandra           | 21                           |
| Tsey_Komla                | 21                           |
| Bailie_Jodie              | 21                           |
| Si_Damin                  | 20                           |
| Connors_Christine         | 20                           |
| Dowden_Michelle           | 17                           |
| O'Donoghue_Lynette        | 15                           |
| Weeramanthri_Tarun        | 14                           |
| Larkins_Sarah             | 13                           |
| Kennedy_Catherine         | 12                           |
| Schierhout_Gill           | 12                           |
| Cunningham_Frances        | 12                           |
| Clelland (Percival)_Nikki | 11                           |
| Laycock_Alison            | 11                           |
| Kwedza_Ru                 | 10                           |
| Bainbridge_Roxanne        | 10                           |
| Cox_Rhonda                | 9                            |
| Brown_Alex                | 9                            |
| McCalman_Janya            | 9                            |
| Robinson_Gary             | 8                            |
| Liddle_Helen              | 8                            |
| Burke_Hugh                | 8                            |
| Rumbold_Alice             | 7                            |
| Boyle_Jacqueline          | 7                            |
| Gardner_Karen             | 6                            |
| Ralph_Anna                | 6                            |
| Burgess_Paul              | 6                            |
| Nagel_Trícia              | 5                            |
| Moore_Elizabeth           | 5                            |

|                   |   |
|-------------------|---|
| Doran_Chris       | 5 |
| Garvey_Gail       | 5 |
| Valery_Patricia   | 5 |
| Kinchin_Irina     | 5 |
| McAullay_Dan      | 5 |
| McAuley_Kimberley | 5 |
| Strobel_Natalie   | 5 |
| Edmond_Karen      | 5 |
| Onnis_Leigh-Ann   | 5 |
