# Supplementary material for: Collaboration and knowledge generation in an 18-year quality improvement research programme in Australian Indigenous primary healthcare: a coauthorship network analysis
Source: PubMed Central journal article supplement — BMJ Open. 2021 May 6;11(5):e045101. doi: 10.1136/bmjopen-2020-045101 (PMC8103942; doi:10.1136/bmjopen-2020-045101), 2021-05-06
Supplement: bmjopen-2020-045101supp002.pdf [file bmjopen-2020-045101supp002.pdf]

## SUPPLEMENTARY FILE 2

Table S1: Publications included in the analysis, phase and research theme allocation, 2002–2019

|                                                                                                                                                                                                                                                                                          | Phases of research collaboration |                      |                      |                      | Categories of research themes |                                                                     |                                  |
|------------------------------------------------------------------------------------------------------------------------------------------------------------------------------------------------------------------------------------------------------------------------------------------|----------------------------------|----------------------|----------------------|----------------------|-------------------------------|---------------------------------------------------------------------|----------------------------------|
|                                                                                                                                                                                                                                                                                          | Phase 1: 2002 – 2004             | Phase 2: 2005 – 2009 | Phase 3: 2010 – 2014 | Phase 4: 2015 – 2019 | CQI in PHC Clinical care      | CQI activities in social, environmental or behavioural determinants | Processes and approaches for CQI |
| Bailie RS, Togni SJ, Si D, et al. Preventive medical care in remote Aboriginal communities in the Northern Territory: a follow-up study of the impact of clinical guidelines, computerised recall and reminder systems, and audit and feedback. <i>BMC Health Serv Res</i> 2003;3(1):15. | 1                                |                      |                      |                      | 1                             |                                                                     |                                  |
| Bailie RS, Si D, Togni SJ, et al. A multifaceted health-service intervention in remote Aboriginal communities: 3-year follow-up of the impact on diabetes care. <i>MJA</i> 2004;181(4):195–200.                                                                                          | 1                                |                      |                      |                      | 1                             |                                                                     |                                  |
| Si D, Bailie R, Connors C, et al. Assessing health centre systems for guiding improvement in diabetes care. <i>BMC Health Serv Res</i> 2005;5(1):56.                                                                                                                                     |                                  | 1                    |                      |                      | 1                             |                                                                     |                                  |
| Wayte KJ, Bailie RS, Stephenson P. Improving the feedback of housing information to Indigenous communities. <i>Environmental Health</i> 2005;5(2):36.                                                                                                                                    |                                  | 1                    |                      |                      |                               | 1                                                                   |                                  |
| Bailie RS, Wayte KJ. A continuous quality improvement approach to Indigenous housing and health. <i>Environmental Health</i> 2006;6(2):36–41.                                                                                                                                            |                                  | 1                    |                      |                      |                               | 1                                                                   |                                  |
| Bailie RS, Robinson G, Kondalsamy-Chennakesavan SN, et al. Investigating the sustainability of outcomes in a chronic disease treatment programme. <i>Soc Sci Med</i> 2006;63(6):1661–70.                                                                                                 |                                  | 1                    |                      |                      | 1                             |                                                                     |                                  |
| Bailie R, Si D, Dowden M, et al. Improving organisational systems for diabetes care in Australian Indigenous communities. <i>BMC Health Serv Res</i> 2007;7(1):67.                                                                                                                       |                                  | 1                    |                      |                      | 1                             |                                                                     |                                  |
| Bailie RS, Si D, O'Donoghue L, et al. Indigenous health: effective and sustainable health services through continuous quality improvement. <i>MJA</i> 2007;186(10):525–7.                                                                                                                |                                  | 1                    |                      |                      |                               |                                                                     | 1                                |
| Si D, Bailie RS, Dowden M, et al. Delivery of preventive health services to Indigenous adults: response to a systems-oriented primary care quality improvement intervention. <i>MJA</i> 2007;187(8):453–7.                                                                               |                                  | 1                    |                      |                      | 1                             |                                                                     |                                  |

|                                                                                                                                                                                                                                                                        |  |   |   |  |   |   |   |
|------------------------------------------------------------------------------------------------------------------------------------------------------------------------------------------------------------------------------------------------------------------------|--|---|---|--|---|---|---|
| McDonald EL, Bailie RS, Rumbold AR, et al. Preventing growth faltering among Australian Indigenous children: implications for policy and practice. <i>MJA</i> 2008;188:S84–S6.                                                                                         |  | 1 |   |  |   |   | 1 |
| Bailie RS, Si D, Dowden MC, et al. Delivery of child health services in Indigenous communities: implications for the federal government's emergency intervention in the Northern Territory. <i>MJA</i> . 2008;188(10):615–8.                                           |  | 1 |   |  | 1 |   |   |
| Si D, Bailie R, Cunningham J, et al. Describing and analysing primary health care system support for chronic illness care in Indigenous communities in Australia's Northern Territory – use of the Chronic Care Model. <i>BMC Health Serv Res</i> 2008;8(1):112.       |  | 1 |   |  |   |   | 1 |
| Bailie R, Sibthorpe B, Gardner K, et al. Quality improvement in Indigenous primary health care: history, current initiatives and future directors. <i>Aust J Prim Health</i> 2008;14(2):53–7.                                                                          |  | 1 |   |  |   |   | 1 |
| Bailie R, Si D, Connors C, et al. Study protocol: audit and best practice for chronic disease extension (ABCDE) project. <i>BMC Health Serv Res</i> 2008;8(1):184.                                                                                                     |  | 1 |   |  |   |   | 1 |
| Si D, Bailie R, Weeramanthri T. Effectiveness of chronic care model-oriented interventions to improve quality of diabetes care: a systematic review. <i>Prim Health Care Res Dev</i> 2008;9(1):25–40.                                                                  |  | 1 |   |  |   |   | 1 |
| Bailie RS, Si D, Dowden MC, et al. A systems approach to improving timeliness of immunisation. <i>Vaccine</i> 2009;27(27):3669–74.                                                                                                                                     |  | 1 |   |  | 1 |   |   |
| Baeza J, Bailie R, Lewis JM. Care for chronic conditions for indigenous Australians: key informants' perspectives on policy. <i>Health Policy</i> 2009;92(2–3):211–7.                                                                                                  |  | 1 |   |  |   |   | 1 |
| Si D, Bailie R, Dowden M, et al. Assessing quality of diabetes care and its variation in Aboriginal community health centres in Australia. <i>Diabetes/Metabolism Research and Reviews</i> 2010;26(6):464–73.                                                          |  |   | 1 |  | 1 |   |   |
| McDonald E, Bailie R, Grace J, et al. An ecological approach to health promotion in remote Australian Aboriginal communities. <i>Health Promot Int</i> 2010;25(1):42–53.                                                                                               |  |   | 1 |  |   | 1 |   |
| Rumbold AR, Bailie RS, Si D, et al. Assessing the quality of maternal health care in Indigenous primary care services. <i>MJA</i> 2010;192(10):597.                                                                                                                    |  |   | 1 |  | 1 |   |   |
| Si D, Bailie R, Wang Z, Weeramanthri T. Comparison of diabetes management in five countries for general and indigenous populations: an internet-based review. <i>BMC Health Serv Res</i> 2010;10(1):169.                                                               |  |   | 1 |  |   |   | 1 |
| Gardner KL, Dowden M, Togni S, Bailie R. Understanding uptake of continuous quality improvement in Indigenous primary health care: lessons from a multi-site case study of the Audit and Best Practice for Chronic Disease project. <i>Implement Sci</i> 2010;5(1):21. |  |   | 1 |  |   |   | 1 |

|                                                                                                                                                                                                                                                                                                                                   |  |  |   |  |   |   |   |
|-----------------------------------------------------------------------------------------------------------------------------------------------------------------------------------------------------------------------------------------------------------------------------------------------------------------------------------|--|--|---|--|---|---|---|
| Bailie R, Si D, Shannon C, Semmens J, et al. Study protocol: national research partnership to improve primary health care performance and outcomes for Indigenous peoples. <i>BMC Health Serv Res</i> 2010;10(1):129.                                                                                                             |  |  | 1 |  |   |   | 1 |
| Gardner K, Bailie R, Si D, et al. Reorienting primary health care for addressing chronic conditions in remote Australia and the South Pacific: review of evidence and lessons from an innovative quality improvement process. <i>Aust J Rural Health</i> 2011;19(3):111–7.                                                        |  |  | 1 |  |   |   | 1 |
| Rumbold AR, Bailie RS, Si D, et al. Delivery of maternal health care in Indigenous primary care services: baseline data for an ongoing quality improvement initiative. <i>BMC Pregnancy Childbirth</i> 2011;11(1):16.                                                                                                             |  |  | 1 |  | 1 |   |   |
| Bailie RS, Si D, Connors CM, et al. Variation in quality of preventive care for well adults in Indigenous community health centres in Australia. <i>BMC Health Serv Res</i> 2011;11(1):139.                                                                                                                                       |  |  | 1 |  | 1 |   |   |
| Si D, Dowden M, Kennedy C, Cox R, et al. Indigenous community care: documented depression in patients with diabetes. <i>Aust Fam Physician</i> 2011;40(5):331.                                                                                                                                                                    |  |  | 1 |  | 1 |   |   |
| Gausia K, Thompson S, Nagel T, et al. Antenatal emotional wellbeing screening in Aboriginal and Torres Strait Islander primary health care services in Australia. <i>Contemp Nurse</i> 2013;46(1):73–82.                                                                                                                          |  |  | 1 |  | 1 |   |   |
| Ralph AP, Fittock M, Schultz R, et al. Improvement in rheumatic fever and rheumatic heart disease management and prevention using a health centre-based continuous quality improvement approach. <i>BMC Health Serv Res</i> 2013;13(1):525.                                                                                       |  |  | 1 |  | 1 |   |   |
| Bailie R, Matthews V, Brands J, et al. A systems-based partnership learning model for strengthening primary healthcare. <i>Implement Sci</i> 2013;8(1):143.                                                                                                                                                                       |  |  | 1 |  |   |   | 1 |
| Schierhout G, Hains J, Si D, et al. Evaluating the effectiveness of a multifaceted, multilevel continuous quality improvement program in primary health care: developing a realist theory of change. <i>Implement Sci</i> 2013;8(1):119.                                                                                          |  |  | 1 |  |   |   | 1 |
| Schierhout G, Nagel T, Si D, et al. Do competing demands of physical illness in type 2 diabetes influence depression screening, documentation and management in primary care: a cross-sectional analytic study in Aboriginal and Torres Strait Islander primary health care settings. <i>Int J Ment Health Syst</i> 2013;7(1):16. |  |  | 1 |  |   |   | 1 |
| McDonald EL, Bailie R, Michel T. Development and trialling of a tool to support a systems approach to improve social determinants of health in rural and remote Australian communities: the healthy community assessment tool. <i>Int J Equity Health</i> 2013;12(1):15.                                                          |  |  | 1 |  |   | 1 |   |

|                                                                                                                                                                                                                                                                                           |  |  |   |   |   |   |   |
|-------------------------------------------------------------------------------------------------------------------------------------------------------------------------------------------------------------------------------------------------------------------------------------------|--|--|---|---|---|---|---|
| O'Donoghue L, Percival N, Laycock A, et al. Evaluating Aboriginal and Torres Strait Islander health promotion activities using audit and feedback. <i>Aust J Prim Health</i> 2014;20(4):339–44.                                                                                           |  |  | 1 |   |   | 1 |   |
| Bailie R, Bailie J, Chakraborty A, et al. Consistency of denominator data in electronic health records in Australian primary healthcare services: enhancing data quality. <i>Aust J Prim Health</i> 2015;21(4):450–9.                                                                     |  |  | 1 |   |   |   | 1 |
| Matthews V, Schierhout G, McBroom J, et al. Duration of participation in continuous quality improvement: a key factor explaining improved delivery of Type 2 diabetes services. <i>BMC Health Serv Res</i> 2014;14(1):578.                                                                |  |  | 1 |   | 1 |   |   |
| Brimblecombe J, Van Den Boogaard C, Ritchie J, et al. From targets to ripples: tracing the process of developing a community capacity building appraisal tool with remote Australian indigenous communities to tackle food security. <i>BMC Public Health</i> 2014;14(1):914.             |  |  | 1 |   |   | 1 |   |
| McDonald EL, Bailie RS, Morris PS. Participatory systems approach to health improvement in Australian Aboriginal children. <i>Health Promot Int</i> 2017;32(1):62–72.                                                                                                                     |  |  | 1 |   |   | 1 |   |
| Gausia K, Thompson SC, Nagel T, et al. Risk of antenatal psychosocial distress in indigenous women and its management at primary health care centres in Australia. <i>General Hospital Psychiatry</i> 2015;37(4):335–9.                                                                   |  |  |   | 1 | 1 |   |   |
| Puszka S, Nagel T, Matthews V, et al. Monitoring and assessing the quality of care for youth: developing an audit tool using an expert consensus approach. <i>Int J Ment Health Syst</i> 2015;9(1).                                                                                       |  |  |   | 1 | 1 |   |   |
| Gibson-Helm ME, Teede HJ, Rumbold AR, et al. Continuous quality improvement and metabolic screening during pregnancy at primary health centres attended by Aboriginal and Torres Strait Islander women. <i>MJA</i> 2015;203(9):369–70.                                                    |  |  |   | 1 | 1 |   |   |
| Tretheway R, Taylor J, O'Hara L, Percival N. A missing ethical competency? A review of critical reflection in health promotion. <i>Health Promot J Austr</i> 2015;26(3):216–21.                                                                                                           |  |  |   | 1 |   | 1 |   |
| McCalman J, Bainbridge R, Russo S, et al. Psycho-social resilience, vulnerability and suicide prevention: impact evaluation of a mentoring approach to modify suicide risk for remote Indigenous Australian students at boarding school. (Report). <i>BMC Public Health</i> 2016;16(108). |  |  |   | 1 |   | 1 |   |
| Newham J, Schierhout G, Bailie R, et al. 'There's only one enabler; come up, help us': staff perspectives of barriers and enablers to continuous quality improvement in Aboriginal primary health-care settings in South Australia. <i>Aust J Prim Health</i> 2016;22(3):244–54.          |  |  |   | 1 |   |   | 1 |

|                                                                                                                                                                                                                                                                                              |  |  |  |   |   |   |   |
|----------------------------------------------------------------------------------------------------------------------------------------------------------------------------------------------------------------------------------------------------------------------------------------------|--|--|--|---|---|---|---|
| Larkins S, Woods CE, Matthews V, et al. Responses of Aboriginal and Torres Strait Islander primary health-care services to continuous quality improvement initiatives. <i>Front Public Health</i> 2016;3:288.                                                                                |  |  |  | 1 | 1 |   |   |
| Crinall B, Boyle J, Gibson-Helm M, et al. Cardiovascular disease risk in young Indigenous Australians: a snapshot of current preventive health care. <i>Aust N Z J Public Health</i> 2017;41(5):460–6.                                                                                       |  |  |  | 1 | 1 |   |   |
| Bailie C, Matthews V, Bailie J, et al. Determinants and gaps in preventive care delivery for Indigenous Australians: a cross-sectional analysis. <i>Front Public Health</i> 2016;4.                                                                                                          |  |  |  | 1 | 1 |   |   |
| Ralph AP, de Dassel JL, Kirby A, et al. Improving delivery of secondary prophylaxis for rheumatic heart disease in a high-burden setting: outcome of a stepped-wedge, community, randomized trial. <i>J Am Heart Assoc: Cardiovascular and Cerebrovascular Disease</i> 2018;7(14).           |  |  |  | 1 | 1 |   |   |
| Vasant BR, Matthews V, Burgess CP, et al. Wide variation in absolute cardiovascular risk assessment in Aboriginal and Torres Strait Islander people with Type 2 diabetes. <i>Front Public Health</i> 2016;4:37.                                                                              |  |  |  | 1 | 1 |   |   |
| Percival N, O'Donoghue L, Lin V, et al. Improving health promotion using quality improvement techniques in Australian Indigenous primary health care. <i>Front Public Health</i> 2016;4.                                                                                                     |  |  |  | 1 |   | 1 |   |
| Laycock A, Bailie J, Matthews V, et al. Interactive dissemination: engaging stakeholders in the use of aggregated quality improvement data for system-wide change in Australian Indigenous primary health care. <i>Front Public Health</i> 2016;4.                                           |  |  |  | 1 |   |   | 1 |
| Bailie J, Laycock A, Matthews V, et al. System-level action required for wide-scale improvement in quality of primary health care: synthesis of feedback from an interactive process to promote dissemination and use of aggregated quality of care data. <i>Front Public Health</i> 2016;4. |  |  |  | 1 | 1 |   |   |
| Gibson-Helm M, Rumbold A, Teede H, et al. Improving the provision of pregnancy care for Aboriginal and Torres Strait Islander women: a continuous quality improvement initiative. <i>BMC Pregnancy Childbirth</i> 2016;16(118).                                                              |  |  |  | 1 | 1 |   |   |
| Percival NA, McCalman J, Armit C, et al. Implementing health promotion tools in Australian Indigenous primary health care. <i>Health Promot Int</i> 2018;33(1):92–106.                                                                                                                       |  |  |  | 1 |   | 1 |   |
| Hayward MN, Paquette-Warren J, Harris SB. Developing community-driven quality improvement initiatives to enhance chronic disease care in Indigenous communities in Canada: the FORGE AHEAD program protocol. <i>Health Res Policy Syst</i> 2016;14(1):55.                                    |  |  |  | 1 |   |   | 1 |

|                                                                                                                                                                                                                                                                                     |  |  |  |   |   |  |   |
|-------------------------------------------------------------------------------------------------------------------------------------------------------------------------------------------------------------------------------------------------------------------------------------|--|--|--|---|---|--|---|
| D'Aprano A, Silburn S, Johnston V, et al. Challenges in monitoring the development of young children in remote Aboriginal health services: clinical audit findings and recommendations for improving practice. <i>Rural Remote Health</i> 2016;16(3):3852.                          |  |  |  | 1 | 1 |  |   |
| Cunningham FC, Ferguson-Hill S, Matthews V, et al. Leveraging quality improvement through use of the Systems Assessment Tool in Indigenous primary health care services: a mixed methods study. <i>BMC Health Serv Res</i> . 2016;16(1).                                            |  |  |  | 1 |   |  | 1 |
| Schierhout G, Matthews V, Connors C, et al. Improvement in delivery of type 2 diabetes services differs by mode of care: a retrospective longitudinal analysis in the Aboriginal and Torres Strait Islander primary health care setting. <i>BMC Health Serv Res</i> 2016;16(1):560. |  |  |  | 1 | 1 |  |   |
| Burnett AM, Morse A, Naduvilath T, et al. Delivery of eye and vision services in Aboriginal and Torres Strait Islander primary healthcare centers. <i>Front Public Health</i> 2016;4.                                                                                               |  |  |  | 1 | 1 |  |   |
| Searles A, Doran C, Attia J, et al. An approach to measuring and encouraging research translation and research impact. <i>Health Res Policy Syst</i> 2016;14(1).                                                                                                                    |  |  |  | 1 |   |  | 1 |
| Doran CM, Ling R, Searles A, et al. Does evidence influence policy? Resource allocation and the Indigenous Burden of Disease Study. <i>Aust Health Rev</i> 2016;40(6):705–15.                                                                                                       |  |  |  | 1 |   |  | 1 |
| McCalman J, Bainbridge R, Percival N, et al. The effectiveness of implementation in Indigenous Australian healthcare: an overview of literature reviews. <i>Int J Equity Health</i> 2016;15:47.                                                                                     |  |  |  | 1 |   |  | 1 |
| Woods C, Carlisle K, Larkins S, et al. Exploring systems that support good clinical care in Indigenous primary health-care services: a retrospective analysis of longitudinal systems assessment tool data from high-improving services. <i>Front Public Health</i> 2017;5(45).     |  |  |  | 1 |   |  | 1 |
| Hayward MN, Mequanint S, Paquette-Warren J, et al. The FORGE AHEAD clinical readiness consultation tool: a validated tool to assess clinical readiness for chronic disease care mobilization in Canada's First Nations. <i>BMC Health Serv Res</i> 2017;17(1).                      |  |  |  | 1 |   |  | 1 |
| Kearns T, Ward F, Puszka S, et al. Anaemia health literacy of community members and health practitioners knowledge of best practice guidelines in a remote Australian Aboriginal community. <i>Univers J Public Health</i> 2017;5(1):32–9.                                          |  |  |  | 1 | 1 |  |   |
| Nattabi B, Matthews V, Bailie J, et al. Wide variation in sexually transmitted infection testing and counselling at Aboriginal primary health care centres in Australia: analysis of longitudinal continuous quality improvement data. <i>BMC Infect Dis</i> 2017;17(1).            |  |  |  | 1 | 1 |  |   |

|                                                                                                                                                                                                                                                                                       |  |  |  |   |   |   |   |
|---------------------------------------------------------------------------------------------------------------------------------------------------------------------------------------------------------------------------------------------------------------------------------------|--|--|--|---|---|---|---|
| Meiklejohn JA, Garvey G, Bailie R, et al. Follow-up cancer care: perspectives of Aboriginal and Torres Strait Islander cancer survivors. <i>Support Care Cancer</i> 2017;25(5):1597.                                                                                                  |  |  |  | 1 | 1 |   |   |
| Laycock A, Bailie J, Matthews V, et al. A developmental evaluation to enhance stakeholder engagement in a wide-scale interactive project disseminating quality improvement data: study protocol for a mixed-methods study. <i>BMJ Open</i> 2017;7(7).                                 |  |  |  | 1 |   |   | 1 |
| Bailie J, Matthews V, Laycock A, et al. Improving preventive health care in Aboriginal and Torres Strait Islander primary care settings. <i>Globalization and Health</i> 2017;13(1):48.                                                                                               |  |  |  | 1 | 1 |   |   |
| Brimblecombe J, Bailie R, van Den Boogaard C, et al. Feasibility of a novel participatory multi-sector continuous improvement approach to enhance food security in remote Indigenous Australian communities. <i>SSM – Popul Health</i> 2017;3(C):566–76.                              |  |  |  | 1 |   | 1 |   |
| Langham E, McCalman J, Matthews V, et al. Social and emotional wellbeing screening for Aboriginal and Torres Strait Islanders within primary health care: a series of missed opportunities? <i>Front Public Health</i> 2017;5:159.                                                    |  |  |  | 1 | 1 |   |   |
| de Witt A, Cunningham FC, Bailie R, Bernardes CM, Matthews V, Arley B, et al. Identification of Australian Aboriginal and Torres Strait Islander cancer patients in the primary health care setting. <i>Front Public Health</i> 2017;5:199.                                           |  |  |  | 1 | 1 |   |   |
| Matthews V, Burgess CP, Connors C, et al. Integrated clinical decision support systems promote absolute cardiovascular risk assessment: an important primary prevention measure in Aboriginal and Torres Strait Islander primary health care. <i>Front Public Health</i> 2017;5(233). |  |  |  | 1 | 1 |   |   |
| Bailie R, Matthews V, Larkins S, et al. Impact of policy support on uptake of evidence-based continuous quality improvement activities and the quality of care for Indigenous Australians: a comparative case study. <i>BMJ Open</i> 2017;7(10).                                      |  |  |  | 1 |   |   | 1 |
| Zuchowski I, Miles D, Woods C, Tsey K. Continuous quality improvement processes in child protection: a systematic literature review. <i>Res Soc Work Pract</i> 2017:1049731517743337.                                                                                                 |  |  |  | 1 |   | 1 |   |
| Ramanathan S, Reeves P, Deeming S, et al. Encouraging translation and assessing impact of the Centre for Research Excellence in Integrated Quality Improvement: rationale and protocol for a research impact assessment. <i>BMJ Open</i> 2017;7(12).                                  |  |  |  | 1 |   |   | 1 |
| Bailie R, Bailie J, Larkins S, Broughton E. Editorial: Continuous quality improvement (CQI) – advancing understanding of design, application, impact, and evaluation of CQI approaches. <i>Front Public Health</i> 2017;5(306).                                                       |  |  |  | 1 |   |   | 1 |
| Bailie R, Larkins S, Broughton E. Continuous Quality Improvement – Advancing Understanding of Design, Application, Impact and Evaluation of CQI Approaches. Lausanne, Switzerland: Frontiers Media SA 2017.                                                                           |  |  |  | 1 | 1 |   |   |

|                                                                                                                                                                                                                                                      |  |  |  |   |   |   |   |
|------------------------------------------------------------------------------------------------------------------------------------------------------------------------------------------------------------------------------------------------------|--|--|--|---|---|---|---|
| McAullay D, McAuley K, Bailie R, et al. Sustained participation in annual continuous quality improvement activities improves quality of care for Aboriginal and Torres Strait Islander children. <i>J Paediatr Child Health</i> 2018;54(2):132–40.   |  |  |  | 1 | 1 |   |   |
| Edmond KM, McAuley K, McAullay D, et al. Quality of social and emotional wellbeing services for families of young Indigenous children attending primary care centers; a cross sectional analysis. <i>BMC Health Serv Res</i> 2018;18(1).             |  |  |  | 1 | 1 |   |   |
| Gibson-Helm ME, Bailie J, Matthews V, et al. Identifying evidence-practice gaps and strategies for improvement in Aboriginal and Torres Strait Islander maternal health care. <i>PLoS ONE</i> 2018;13(2):e0192262.                                   |  |  |  | 1 | 1 |   |   |
| Bailie J, Matthews V, Laycock A, et al. Rigorous follow-up systems for abnormal results are essential to improve health outcomes for Aboriginal and Torres Strait Islander people. <i>Aust J Prim Health</i> 2018;24:1–3.                            |  |  |  | 1 |   |   | 1 |
| McCalman J, Bailie R, Bainbridge R, et al. Continuous quality improvement and comprehensive primary health care: a systems framework to improve service quality and health outcomes. <i>Front Public Health</i> 2018;6.                              |  |  |  | 1 |   |   | 1 |
| McPhail-Bell K, Matthews V, Bainbridge R, et al. An ‘All Teach, All Learn’ approach to research capacity strengthening in Indigenous primary health care continuous quality improvement. <i>Front Public Health</i> 2018;6.                          |  |  |  | 1 |   | 1 |   |
| McCalman J, Bainbridge R, Brown C, et al. The Aboriginal Australian Family Wellbeing Program: a historical analysis of the conditions that enabled its spread. <i>Front Public Health</i> 2018;6.                                                    |  |  |  | 1 |   |   | 1 |
| Bailie J, Cunningham FC, Bainbridge RG, et al. Comparing and contrasting ‘innovation platforms’ with other forms of professional networks for strengthening primary healthcare systems for Indigenous Australians. <i>BMJ Glob Health</i> 2018;3(3). |  |  |  | 1 | 1 |   |   |
| Meiklejohn JA, Arley B, Bailie R, et al. Community-identified recommendations to enhance cancer survivorship for Aboriginal and Torres Strait Islander people. <i>Aust J Prim Health</i> 2018;24(3):233–40.                                          |  |  |  | 1 | 1 |   |   |
| Bailie J, Boyle JA, Bailie RS. Population attributable fractions of perinatal outcomes for nulliparous women associated with overweight and obesity, 1990–2014. <i>Med J Aust</i> 2018;208(11):505–6.                                                |  |  |  | 1 |   |   | 1 |
| Cunningham FC, Matthews V, Sheahan A, et al. Assessing collaboration in a National Research Partnership in Quality Improvement in Indigenous Primary Health Care: a network approach. <i>Front Public Health</i> . 2018;6(182).                      |  |  |  | 1 |   | 1 |   |
| Onnis L-A, Klieve H, Tsey K. The evidence needed to demonstrate impact: A synthesis of the evidence from a phased social and emotional wellbeing intervention. <i>Eval Program Plann</i> 2018;70:35–43.                                              |  |  |  | 1 | 1 |   |   |



|                                                                                                                                                                                                                                                                                    |  |  |  |   |   |   |   |
|------------------------------------------------------------------------------------------------------------------------------------------------------------------------------------------------------------------------------------------------------------------------------------|--|--|--|---|---|---|---|
| Ralph AP, de Dassel JL, Kirby A, et al. Improving delivery of secondary prophylaxis for Rheumatic Heart Disease in a high-burden setting: outcome of a stepped-wedge, community, randomized trial. <i>J Am Heart Assoc: Cardiovascular and Cerebrovascular Disease</i> 2018;7(14). |  |  |  | 1 |   | 1 |   |
| Heyeres M, Kinchin I, Whatley E, et al. Evaluation of a residential mental health recovery service in North Queensland. <i>Front Public Health</i> 2018;6:123.                                                                                                                     |  |  |  | 1 | 1 |   |   |
| Read C, Mitchell AG, de Dassel JL, et al. Qualitative evaluation of a complex intervention to improve Rheumatic Heart Disease secondary prophylaxis. <i>J Am Heart Assoc.</i> 2018;7(14).                                                                                          |  |  |  | 1 | 1 |   |   |
| Nattabi B, Girgis S, Matthews V, et al. Clinic predictors of better syphilis testing in Aboriginal primary healthcare: a promising opportunity for primary healthcare service managers. <i>Aust J Prim Health</i> 2018;24(4):350–8.                                                |  |  |  | 1 | 1 |   |   |
| Edmond KM, Tung S, McAuley K, et al. Improving developmental care in primary practice for disadvantaged children. <i>Arch Dis Childhood</i> 2019;104(4):372–80.                                                                                                                    |  |  |  | 1 | 1 |   |   |
| Strobel NA, McAuley K, Matthews V, et al. Understanding the structure and processes of primary health care for young indigenous children. <i>J Prim Health Care</i> 2018;10(3):267–78.                                                                                             |  |  |  | 1 |   | 1 |   |
| Onnis L-A, Hakendorf M, Tsey K. How are Continuous Quality Improvement (CQI) approaches used in evaluating management development programs? a literature review. <i>Asia Pacific Journal of Health Management</i> 2018;13(2):1–15.                                                 |  |  |  | 1 |   |   | 1 |
| Smith G, Kirkham R, Gunabarra C, et al. ‘We can work together, talk together’: an Aboriginal health care home. <i>Aust Health Rev</i> 2018;43:486–91.                                                                                                                              |  |  |  | 1 |   | 1 |   |
| Tsey K, Lui SM, Heyeres M, et al. Developing soft skills: exploring the feasibility of an Australian well-being program for health managers and leaders in Timor-Leste. <i>SAGE Open</i> 2018;8(4).                                                                                |  |  |  | 1 |   |   | 1 |
| Laycock A, Harvey G, Percival N, et al. Application of the i-PARIHS framework for enhancing understanding of interactive dissemination to achieve wide-scale improvement in Indigenous primary healthcare. <i>Health Res Policy Syst</i> 2018;16(1).                               |  |  |  | 1 | 1 |   |   |
| de Witt A, Cunningham FC, Bailie R, et al. ‘It’s just presence’, the contributions of Aboriginal and Torres Strait Islander health professionals in cancer care in Queensland. <i>Front Public Health</i> 2018;6:344.                                                              |  |  |  | 1 |   | 1 |   |
| Zuchowski I, Miles D, Gair S, et al. K. Social work research with industry: a systematic literature review of engagement and impact. <i>Br J Soc Work</i> 2019;49(8):2299–324.                                                                                                     |  |  |  | 1 |   |   | 1 |
| Heyeres M, Tsey K, Yang Y, et al. The characteristics and reporting quality of research impact case studies: a systematic review. <i>Eval Program Plann</i> 2019;73:10–23.                                                                                                         |  |  |  | 1 |   |   | 1 |

|                                                                                                                                                                                                                                                                                      |  |  |  |   |   |   |   |
|--------------------------------------------------------------------------------------------------------------------------------------------------------------------------------------------------------------------------------------------------------------------------------------|--|--|--|---|---|---|---|
| Laycock AF, Bailie J, Percival NA, et al. Wide-scale continuous quality improvement: a study of stakeholders' use of quality of care reports at various system levels, and factors mediating use. <i>Front Public Health</i> 2019;6.                                                 |  |  |  | 1 | 1 |   |   |
| Bailie J, Laycock A, Matthews V, et al. Emerging evidence of the value of health assessments for Aboriginal and Torres Strait Islander people in the primary healthcare setting. <i>Aust J Prim Health</i> 2019;25(1):1–5.                                                           |  |  |  | 1 |   |   | 1 |
| Tsey K, Onnis L-A, Whiteside M, et al. Assessing research impact: Australian Research Council criteria and the case of Family Wellbeing research. <i>Eval Program Plann</i> 2019;73:176–86.                                                                                          |  |  |  | 1 | 1 |   |   |
| Lestari T, Graham S, Van den Boogard C, et al. Bridging the knowledge-practice gap in tuberculosis contact management in a high-burden setting: a mixed-methods protocol for a multicenter health system strengthening study. <i>Implement Sci</i> 2019;14(1):31.                    |  |  |  | 1 |   | 1 |   |
| Onnis L-A, Hakendorf M, Diamond M, et al. CQI approaches for evaluating management development programs: a case study with health service managers from geographically remote settings. <i>Eval Program Plann</i> 2019;74:91–101.                                                    |  |  |  | 1 |   |   | 1 |
| Turner NN, Taylor J, Larkins S, et al. Conceptualizing the association between community participation and CQI in Aboriginal and Torres Strait Islander PHC services. <i>Qual Health Res</i> 2019;29(13):1904–15.                                                                    |  |  |  | 1 | 1 |   |   |
| Gunaratnam P, Schierhout G, Brands J, et al. Qualitative perspectives on the sustainability of sexual health continuous quality improvement in clinics serving remote Aboriginal communities in Australia. <i>BMJ Open</i> 2019;9(5):e026679.                                        |  |  |  | 1 | 1 |   |   |
| Valery PC, Bernardes CM, De Witt A, et al. Patterns of primary health care service use of Indigenous Australians diagnosed with cancer. <i>Support Care Cancer</i> 2020;28(1):317–27.                                                                                                |  |  |  | 1 | 1 |   |   |
| Mitchinson C, Strobel N, McAullay D, et al. Anemia in disadvantaged children aged under five years: quality of care in primary practice. <i>BMC Pediatr</i> 2019;19(1):178.                                                                                                          |  |  |  | 1 |   |   | 1 |
| Larkins S, Carlisle K, Turner N, et al. 'At the grass roots level it's about sitting down and talking': exploring quality improvement through case studies with high-improving Aboriginal and Torres Strait Islander primary healthcare services. <i>BMJ Open</i> 2019;9(5):e027568. |  |  |  | 1 |   | 1 |   |
| Conte KP, Gwynn J, Turner N, Koller C, Gillham KE. Making space for Aboriginal and Torres Strait Islander community health workers in health promotion. <i>Health Promot Int</i> 2019.                                                                                               |  |  |  | 1 | 1 |   |   |
| Carroll SJ, Dale MJ, Bailie R, et al. Climatic and community sociodemographic factors associated with remote Indigenous Australian smoking rates: an ecological study of health audit data. <i>BMJ Open</i> 2019;9(7).                                                               |  |  |  | 1 |   |   | 1 |

|                                                                                                                                                                                                                                                                                                       |  |  |  |   |   |   |   |
|-------------------------------------------------------------------------------------------------------------------------------------------------------------------------------------------------------------------------------------------------------------------------------------------------------|--|--|--|---|---|---|---|
| Preston R, Rannard S, Felton-Busch C, et al. How and why do participatory women's groups (PWGs) improve the quality of maternal and child health (MCH) care? A systematic review protocol. <i>BMJ Open</i> 2019;9(9):e030461.                                                                         |  |  |  | 1 |   |   | 1 |
| Laycock A, Bailie J, Matthews V, et al. Using developmental evaluation to support knowledge translation: reflections from a large-scale quality improvement project in Indigenous primary healthcare. <i>Health Res Policy Syst</i> 2019;17(1):70.                                                    |  |  |  | 1 | 1 |   |   |
| Diaz A, Vo B, Baade PD, Matthews V, et al. Service level factors associated with cervical screening in Aboriginal and Torres Strait Islander primary health care centres in Australia. <i>Int J Environ Res Public Health</i> 2019;16(19):3630.                                                       |  |  |  | 1 | 1 |   |   |
| Kinchin I, Russell AM, Tsey K, et al. Psychiatric inpatient cost of care before and after admission at a residential subacute step-up/step-down mental health facility. <i>J Med Econ</i> 2019;22(5):491–8.                                                                                           |  |  |  | 1 |   | 1 |   |
| Lopez-Carmen V, McCalman J, Benveniste T, Askew D, Spurling G, Langham E, et al. Working together to improve the mental health of indigenous children: a systematic review. <i>Child Youth Serv Rev</i> 2019;104:104408.                                                                              |  |  |  | 1 |   |   | 1 |
| Tsey K. Working on Wicked Problems: A Strengths-based Approach to Research Engagement and Impact. Basel, Switzerland: Springer Nature 2019.                                                                                                                                                           |  |  |  | 1 |   |   | 1 |
| Cunningham FC, Ranmuthugala G, Westbrook JI, et al. Tackling the wicked problem of health networks: the design of an evaluation framework. <i>BMJ Open</i> 2019;9(5):e024231.                                                                                                                         |  |  |  | 1 |   | 1 |   |
| Onnis L-A, Moylan R, Whiteside M, et al. Integrating the Family Wellbeing Program into practice: a conceptual model. <i>Australian Social Work</i> 2019:1–14.                                                                                                                                         |  |  |  | 1 | 1 |   |   |
| Carrington A, Dewar S, Kinchin I, et al. A police-led community response to child abuse and youth sexual violence and abuse in Indigenous communities in Far North Queensland: 'Speak up. Be strong. Be heard'. <i>Child Abuse Negl</i> 2019;98:104228.                                               |  |  |  | 1 |   |   | 1 |
| Fazelipour M, Cunningham F. Barriers and facilitators to the implementation of brief interventions targeting smoking, nutrition, and physical activity for indigenous populations: a narrative review. <i>Int J Equity Health</i> 2019;18(1):169.                                                     |  |  |  | 1 | 1 |   |   |
| Katzenellenbogen J, Bond-Smith D, Ralph A, et al. Priorities for improvement in management of Acute Rheumatic Fever and Rheumatic Heart Disease: analysis of cross-sectional continuous quality improvement data in Aboriginal primary health care centres in Australia. <i>Aust Health Rev</i> 2019. |  |  |  | 1 | 1 |   |   |
| Quinn E, Girgis S, Van Buskirk J, Matthews V, Ward JE. Clinic factors associated with better delivery of secondary prophylaxis in acute rheumatic fever management. <i>Aust J Gen Pract</i> 2019;48(12):859.                                                                                          |  |  |  | 1 | 1 |   |   |

|                                                                                                                                                                                                                |  |  |  |   |   |  |  |
|----------------------------------------------------------------------------------------------------------------------------------------------------------------------------------------------------------------|--|--|--|---|---|--|--|
| Adily A, Girgis S, D'Este C, Mathews V, Ward JE. Syphilis testing performance in Aboriginal primary health care: exploring impact of continuous quality improvement over time. <i>Aust J Prim Health</i> 2020. |  |  |  | 1 | 1 |  |  |
|----------------------------------------------------------------------------------------------------------------------------------------------------------------------------------------------------------------|--|--|--|---|---|--|--|
